# Supplementary material for: Differences in scapular upward rotation, pectoralis minor and levator scapulae muscle length between the symptomatic, the contralateral asymptomatic shoulder and control subjects: a cross-sectional study in a Spanish primary care setting
Source: PubMed Central journal article supplement — BMJ Open. 2019 Jun 12;9(6):e023020. doi: 10.1136/bmjopen-2018-023020 (PMC6575639; doi:10.1136/bmjopen-2018-023020), 2019-06-12
Supplement: bmjopen-2018-023020.draft_revisions.pdf [file bmjopen-2018-023020.draft_revisions.pdf]

# BMJ Open

BMJ Open is committed to open peer review. As part of this commitment we make the peer review history of every article we publish publicly available.

When an article is published we post the peer reviewers' comments and the authors' responses online. We also post the versions of the paper that were used during peer review. These are the versions that the peer review comments apply to.

The versions of the paper that follow are the versions that were submitted during the peer review process. They are not the versions of record or the final published versions. They should not be cited or distributed as the published version of this manuscript.

BMJ Open is an open access journal and the full, final, typeset and author-corrected version of record of the manuscript is available on our site with no access controls, subscription charges or pay-per-view fees (<http://bmjopen.bmj.com>).

If you have any questions on BMJ Open's open peer review process please email [info.bmjopen@bmj.com](mailto:info.bmjopen@bmj.com)

# BMJ Open

## Differences in scapular upward rotation, pectoralis minor and levator scapulae muscle length between the symptomatic, the contralateral asymptomatic shoulder and control subjects: A cross-sectional study

|                               |                                                                                                                                                                                                                                                                                                                                                                      |
|-------------------------------|----------------------------------------------------------------------------------------------------------------------------------------------------------------------------------------------------------------------------------------------------------------------------------------------------------------------------------------------------------------------|
| Journal:                      | <i>BMJ Open</i>                                                                                                                                                                                                                                                                                                                                                      |
| Manuscript ID                 | bmjopen-2018-023020                                                                                                                                                                                                                                                                                                                                                  |
| Article Type:                 | Research                                                                                                                                                                                                                                                                                                                                                             |
| Date Submitted by the Author: | 08-Apr-2018                                                                                                                                                                                                                                                                                                                                                          |
| Complete List of Authors:     | Navarro-Ledesma, Santiago; University of Granada, Physiotherapy<br>Fernandez-Sanchez, Manuel; Universidad De Almeria Facultad de Ciencias de la Educacion Enfermeria y Fisioterapia<br>STRUYF, FILIP; Universiteit Antwerpen Campus Drie Eiken, REHABILITATION SCIENCES<br>Martinez-Calderon, Javier<br>LUQUE-SUAREZ, ALEJANDRO; UNIVERSITY OF MALAGA, PHYSIOTHERAPY |
| Keywords:                     | scapular kinematic, shoulder pain, chronic pain                                                                                                                                                                                                                                                                                                                      |
|                               |                                                                                                                                                                                                                                                                                                                                                                      |

SCHOLARONE™  
Manuscripts

Peer Review Only

1  
2  
3 **Differences in scapular upward rotation, pectoralis minor and levator scapulae**  
4 **muscle length between the symptomatic, the contralateral asymptomatic shoulder**  
5 **and control subjects: A cross-sectional study.**  
6  
7  
8  
9

10 Navarro-Ledesma S\*; Fernandez-Sanchez M; Struyf F; Martinez-Calderon J; Luque-  
11 Suarez A  
12  
13

14  
15 Corresponding author:

16  
17 Santiago Navarro-Ledesma (snl@ugr.es)

18  
19 Av. de la Ilustración, 60, 18016 Urb. los Vergeles, Granada, Spain

20  
21 00 34 951 952 853  
22  
23

24  
25  
26 Santiago Navarro-Ledesma

27  
28 Department of Physiotherapy, University of Granada, Spain

29  
30 Department of Physiotherapy, University of Malaga, Spain  
31  
32

33  
34 Manuel Fernandez-Sanchez

35  
36 Department of Physiotherapy, University of Almeria, Spain  
37  
38

39  
40  
41 Filip Struyf

42  
43 Department of Rehabilitation Sciences and Physiotherapy, University of Antwerp,

44  
45 Antwerpen, Belgium  
46  
47

48  
49 Javier Martinez-Calderon

50  
51 Department of Physiotherapy, University of Malaga, Spain  
52  
53  
54  
55  
56  
57  
58  
59  
60

1  
2  
3 Alejandro Luque-Suarez

4 Department of Physiotherapy, University of Malaga, Spain

5  
6  
7  
8  
9 Keywords: scapular kinematic; shoulder pain; chronic pain

10  
11  
12 Word count: 3523

13  
14  
15  
16  
17  
18  
19  
20  
21  
22  
23  
24 **ABSTRACT**

25  
26  
27 Objective: To determine the potential differences in both scapular positioning and  
28 scapular movement between the symptomatic and asymptomatic contralateral shoulder,  
29 in patients with unilateral subacromial pain syndrome (SAPS), and in comparison with  
30 those of participants free of shoulder pain.  
31  
32  
33  
34  
35

36 Setting: Three different primary care centres.

37  
38  
39 Participants: A sample of seventy-three patients with SAPS in their dominant arm was  
40 recruited, with a final sample size of fifty-four participants.  
41  
42  
43

44 Primary outcome measures: The scapular upward rotation (SUR), the pectoralis minor  
45 and the levator scapulae muscles length tests were carried out.  
46  
47  
48

49 Results: We found a decreased SUR in symptomatic shoulder compared to contralateral  
50 asymptomatic at 45 degrees of shoulder elevation. When symptomatic shoulders and  
51 control subjects are compared, an increased SUR at all positions (45, 90 and 135  
52 degrees) was obtained in symptomatic shoulders. These differences in SUR did surpass  
53  
54  
55  
56  
57  
58  
59  
60

1  
2  
3 the minimal detectable change (MDC95). A greater pectoral minor index was found in  
4  
5 symptomatic shoulders when compared with control subjects but differences were  
6  
7 smaller than MDC95. For the rest of the comparisons, no significant differences were  
8  
9 found.

10  
11  
12 Conclusions: Scapular upward rotation is greater in patients with chronic SAPS  
13  
14 compared with control volunteers at different angles of shoulder elevation. Furthermore,  
15  
16 a difference of 1, 15 degrees of SUR between symptomatic and asymptomatic shoulder  
17  
18 in those with chronic SAPS when comparing both at 45° of shoulder elevation may  
19  
20 indicate shoulder dysfunction.  
21

22  
23  
24 Keywords: scapular kinematic; shoulder pain; chronic pain  
25  
26  
27  
28  
29

### 30 **Strengths and limitations of this study**

31  
32 The intra-rater reliability obtained in all the measurements was excellent.  
33

34  
35 An exhaustive ultrasound and clinical assessment to avoid the inclusion of patients with  
36  
37 rotator cuff tears was carried out.  
38

39  
40 The examiner who assessed all the measurements had an extensive clinical experience.  
41

42  
43 The inter-rater reliability was not calculated, so this could introduce bias.  
44

45  
46 The minimal clinically importance difference for SUR is unknown, thus we cannot  
47  
48 make a conclusion to whether the differences found in this study mean a clinical  
49  
50 importance or not.  
51  
52  
53  
54  
55  
56  
57  
58  
59  
60

## INTRODUCTION

Shoulder pain is the most common musculoskeletal condition after neck pain and low back pain[1]. Shoulder pain point prevalence figures range from 6.9 to 26%, from 18.6 to 31% for 1-month prevalence, from 4.7 to 46.7% for 1-year prevalence, and from 6.7 to 66.7% for lifetime prevalence[2]. Furthermore, shoulder pain prevalence is even higher in women[3], in the working population[4], and increases with age[5].

Subacromial pain syndrome (SAPS) is the most common cause of shoulder pain[6][7]. The best therapeutic approach in SAPS is still under debate. Half of the patients with shoulder pain who present in primary care do not completely recover after 6 months from their first episode[8], so there is a need to explore different strategies in these patients. One of the approaches that can be beneficial for the patient is focused on the scapulothoracic joint. To date, there is inconsistent evidence to support a relationship between shoulder symptoms and scapular orientation[9][6]. The most common causative mechanisms of an altered scapular positioning involves the soft tissue, such as inflexibility (tightness) and alterations in the periscapular muscles[10]. The pectoralis minor index (PMI) and the levator scapulae index (LSI) [11][12] have been traditionally used to assess the muscles that can potentially influence scapular positioning.

Previous studies have reported normative values on PMI in the dominant and non-dominant side in both symptomatic and control populations.[13][14] However differences between groups were not calculated. To the best of our knowledge, differences in LSI between symptomatic and control populations have not been determined. With regard to patterns of movement, a reduced scapular upward rotation (SUR) and an increased scapular anterior tilt have been found in patients with SAPS when compared to asymptomatic subjects[15][16].

1  
2  
3 Advanced equipment to assess scapular positioning and kinematics exist, nevertheless,  
4 most of them are very technical and highly expensive, which makes them almost  
5 unattainable in the clinical practice[17]. In this regard, research states that the SUR  
6 seems suitably evidence-based for clinical use, while the pectoralis minor length test  
7 should be used as a supplementary clinical assessment method in addition to other  
8 assessment methods[18][19]. Likewise, the levator scapulae muscle length test has been  
9 shown to be a reliable tool, and it has been proposed as part of the scapula assessment  
10 because the levator scapulae directly attaches in the superior angle of the scapula[12]  
11 and thus it is another possible cause of scapular dysfunction[20].  
12  
13  
14  
15  
16  
17  
18  
19  
20  
21  
22  
23

24 There is lack of evidence on the potential differences in PMI, LSI and SUR, between  
25 painful and contralateral non-painful shoulders, and controls subjects. The existence of  
26 differences in scapular positioning and pattern of movement could contribute to steer  
27 physiotherapy treatments towards a scapular focused treatment approach.  
28  
29  
30  
31

32 Hence, the aim of this study was to analyse the differences in scapular positioning and  
33 pattern of movement, between the symptomatic and asymptomatic shoulder, in patients  
34 with unilateral chronic SAPS, and in control subjects, using three different tests: i)  
35 scapular upward rotation, ii) pectoral minor muscle length and, iii) levator scapulae  
36 muscle length.  
37  
38  
39  
40  
41  
42  
43  
44  
45

## 46 **METHOD**

### 47 **Study design**

48 This was a cross-sectional, observational study, carried out in accordance with the  
49 Declaration of Helsinki. Ethical approval was obtained from the Ethics Committee of  
50 the Health Care District where the primary care centres were located (PI9/012014). The  
51  
52  
53  
54  
55  
56  
57  
58  
59  
60

1  
2  
3 study has been reported following the recommendations of the STROBE statement for  
4  
5 observational studies.  
6  
7  
8  
9

## 10 Patient and Public Involvement

11  
12 General practitioners (GPs) carried out the recruitment, and all participants, who had to  
13  
14 sign an informed consent, were screened for eligibility and informed about the research  
15  
16 project by a research assistant. The participation of all subjects was voluntary,  
17  
18 and no incentives were given to encourage enrollment. All measurements were taken by  
19  
20 a physiotherapist with more than 25 years of experience, including height which was  
21  
22 necessary to calculate PMI and LSI values. Height was measured with the patient in a  
23  
24 standing position, by using a calliper placed at the top of the head and marking a point  
25  
26 on a scale placed on the wall. This physiotherapist was blinded to the fact of  
27  
28 participants having shoulder pain or not.  
29  
30  
31

32  
33 The results of the present study were sent by e-mail to those participants who wanted to  
34  
35 be informed.  
36  
37  
38

## 39 Participants

40  
41 A sample of seventy-three patients with chronic unilateral shoulder pain in their  
42  
43 dominant arm was recruited from three different primary care centres, with a final  
44  
45 sample size of fifty-four participants obtained after applying the inclusion criteria.  
46  
47 Participants had to meet the following inclusion criteria: (i) men or women aged  
48  
49 between 18 to 55 years; (ii) unilateral pain located in the anterior and/or lateral shoulder  
50  
51 region; (iii) 2 out of 3 positive clinical tests (Hawkins-Kennedy; Jobe; Neer)[21]; (iv)  
52  
53 pain with normal activity  $\geq$  4/10 on a visual analogue scale; (v) shoulder pain lasting  
54  
55  
56  
57  
58  
59  
60



1  
2  
3 more than three months; (vi) a history of nontraumatic onset of shoulder pain.  
4  
5 Participants were ineligible to participate in this study if any of these conditions were  
6  
7 present: (i) history of significant shoulder trauma, such as fracture or ultrasonography-  
8  
9 clinically suspected full thickness cuff tear; (ii) recent shoulder dislocation on the last  
10  
11 two year; (iii) systemic illnesses such as rheumatoid arthritis; (iv) adhesive capsulitis;  
12  
13 (v) shoulder pain originating from the neck or if there was a neurological impairment,  
14  
15 osteoporosis, haemophilia and/or malignancies.  
16  
17

18  
19  
20 A sample of 54 participants with both shoulders free of pain for the last year was  
21  
22 selected. They were recruited from the same three primary care centres as the  
23  
24 participants with shoulder pain. Furthermore, to participate in the study, they had to  
25  
26 present: (i) a SPADI score  $\leq 15$  points, based on the minimal clinically detectable  
27  
28 change for this tool[22] (Ekeberg et al, 2010); (ii) negative results for Neer test,  
29  
30 Hawkins-Kennedy test and Jobe test; (iii) no painful arc present during flexion or  
31  
32 abduction; (iv) no pain during resisted lateral rotation and/or abduction. Asymptomatic  
33  
34 participants were specifically age and gender matched to the symptomatic group.  
35  
36  
37  
38  
39

#### 40 Outcome measurements

##### 41 *Scapular upward rotation*

42  
43  
44 The measurement of SUR was performed using two Plurimeter-V gravity reference  
45  
46 inclinometers[23]. One inclinometer was Velcro taped perpendicular to the humeral  
47  
48 shaft, just above the humeral epicondyle. At resting position, the humeral inclinometer  
49  
50 was calibrated as 0 degrees. Next, the patients were instructed to perform shoulder  
51  
52 abduction in the coronal plane with full elbow extension and 45° of external humeral  
53  
54 rotation, with the thumb abducted. The patients were asked to stop at 45°, 90° and 135°  
55  
56  
57  
58  
59

1  
2  
3 degrees of humeral abduction, where the SUR was measured with a second  
4 inclinometer, manually aligned along the scapular spine (Figure 1). Three measurements  
5 were collected at each position and then the mean was obtained.  
6  
7

#### 8 9 #FIGURE 1

##### 10 11 *Pectoralis minor length*

12  
13 The measurement of the pectoral minor length was carried out with the participant in the  
14 supine position. A small pillow was placed under the participant's head for comfort.  
15 The participant's arm was passively placed along the side of the body in the neutral  
16 position resting on the table[24]. Because of the variability among subjects this  
17 measurement was best normalized creating a pectoralis minor index (PMI), which was  
18 calculated by dividing the resting muscle length measurement by the subject height and  
19 multiplying by 100, as previously described [11]. The resting muscle length was  
20 measured from the caudal edge of the 4<sup>th</sup> rib to the inferomedial aspect of the coracoid  
21 process with a sliding calliper (Figure 2). Pectoralis minor index values less than 7.65  
22 have been identified as a shortened pectoralis minor[11]. The measurement was taken  
23 during inspiration. [13]  
24  
25  
26  
27  
28  
29  
30  
31  
32  
33  
34  
35  
36

#### 37 38 #FIGURE 2

##### 39 40 *Levator scapulae length*

41  
42 Participants were standing with their arms relaxed at their sides. The subjects were  
43 asked to look directly ahead without craniocervical movement[12]. The instruction was  
44 to palpate two anatomical reference points in line that represent levator scapulae length:  
45  
46 (1) the dorsal tubercles of the transverse processes of the second cervical vertebrae and  
47  
48 (2) the superior angle of the medial borders of the scapula. The assessor used a skin-  
49 marker pencil to mark the reference points. The marks were cleaned immediately after  
50 each test session. The distance between these two bony reference points was measured  
51  
52  
53  
54  
55  
56  
57  
58  
59  
60

1  
2  
3 with a sliding calliper (Figure 3). By creating an LSI (levator scapulae length  
4 [cm]/subjects' height [cm]\*100), the subjects' variability in body height was  
5 normalized[12]. The LSI was expressed as a percentage of the subjects' height.  
6  
7

### 8 9 # FIGURE 3

10  
11 The Shoulder Pain and Disability Index (SPADI) was assessed in all participants. The  
12 SPADI is composed of 13 questions and contains two domains: pain and disability. The  
13 score of the questionnaire ranges from 0 to 100, with very high scores indicating worse  
14 function. The numeric pain scale runs from 0 to 10, with 0 indicating no pain and 10  
15 representing the worst pain.[25] The SPADI has shown a good internal consistency with  
16 a Cronbach's alpha of 0.95 for the total score, 0.92 for the pain subscale and 0.93 for the  
17 disability subscale as well as the ability to detect change over time.[26] A Spanish  
18 version of the SPADI was used since English was not the native language for all the  
19 participants.[27]  
20  
21  
22  
23  
24  
25  
26  
27  
28  
29  
30  
31  
32

### 33 Data analysis

34  
35 The Statistical Package for the Social Sciences (version 23.0 for Mac; SPSS Inc.  
36 Chicago, IL) was used to analyse the collected data. Normality for all variables was  
37 explored using the Kolmogorov Smirnov test for the group of participants with shoulder  
38 pain (affected and non-affected), and for the control subjects. Comparisons for all the  
39 variables between the affected and non-affected groups were calculated using paired  
40 sample t-tests. Comparisons between affected group and controls were calculated using  
41 independent sample t-tests. When normality was violated, comparisons were made  
42 using non-parametric tests for related and/or independent samples. A p-value < 0.05  
43 was considered statistically significant.  
44  
45  
46  
47  
48  
49  
50  
51  
52  
53  
54  
55  
56  
57  
58  
59  
60

## RESULTS

### Participants

Sample characteristics are shown in Table 1

|                        | Patients                                                  | Healthy subjects      | p-value |
|------------------------|-----------------------------------------------------------|-----------------------|---------|
| Age (yrs; CI)          | 46.39 (43.67 to 49.11)                                    | 46.42 (44.1 to 48.67) | 0.98    |
| Women                  | 33                                                        | 33                    | 1       |
| Men                    | 21                                                        | 21                    | 1       |
| SPADI (CI)             | 56,37 (17,69 to 100)                                      | 2,66 (1,73 to 3,60)   | N/A     |
| Chronicity of symptoms | 3-6months: 18<br>6-12 months: 5<br>More than one year: 31 | N/A                   | N/A     |

Table 1: Sample characteristics; Mean (95% CI); N/A: non-applicable

p<0.05: statistically significant; CI= confidence interval

Although it was not a purpose of this study, we calculated intraclass correlation coefficient (ICC), in order to determine the minimal detectable change at 95% (MDC95) for all the outcome measures, which were measured by the same assessor. For the calculation of intrarater reliability of SUR, PMI and LSI, the 3,1 model or a 2-way mixed consistency intraclass correlation coefficient (ICC) model was used. A reliability

coefficient less than 0.50 was an indication of “poor” reliability; “moderate” being between 0.50 and 0.75, “good” between 0.76 and 0.90; and “excellent” over 0.90[28]. The Standard Error of Measurement (SEM), which was computed as  $SEM = SD(\sqrt{1 - ICC})$ , and the MDC95 was calculated using the formula  $MDC95 = 1.96 * \sqrt{2} * SEM$ . The ICC was greater than 0.90 for all the tests, which means an excellent reliability, except for LSI (0, 87). The MDC95 was as follows: SUR45°= 0, 91; SUR90°= 1, 55; SUR135°= 2, 83; PMI= 0, 80; LSI= 1, 08.

#### Descriptive data

Mean values of scapular upward rotation, levator scapulae and pectoralis minor index in different groups are presented in Table 2.

|                     | Symptomatic shoulder   | Asymptomatic shoulder  | Control shoulder       |
|---------------------|------------------------|------------------------|------------------------|
| SUR                 |                        |                        |                        |
| At 45° GH abduction | 4,55 (3,79 to 5,32)    | 5,71 (4,82 to 6,60)    | 2,55 (1,81 to 3,29)    |
| At 90° GH abduction | 20,75 (18,81 to 22,69) | 21,42 (19,88 to 22,96) | 16,77 (15,49 to 18,04) |
|                     | 45,18 (42,76 to        | 44,16 (42,20 to        | 36,22 (34,34 to        |

|                      |                         |                          |                         |
|----------------------|-------------------------|--------------------------|-------------------------|
| At 135° GH abduction | 47,59)                  | 46,12)                   | 38,09)                  |
| PMI                  | 10,52%(10,27 to 10,76%) | 10,86% (10.26 to 11,46%) | 10,07% (9,73 to 10,42%) |
| LSI                  | 7,81% (7,42 to 8,20%)   | 7,81% (7,53 to 8,30)     | 7,76% (7,42 to 8,11%)   |

Table 2: Mean values of pectoralis minor and levator scapulae indexes (%), and scapular upward rotation expressed in degrees in different groups. Abbreviations: GH = glenohumeral; SUR = scapular upward rotation; PMI = pectoralis minor index; LSI = levator scapulae index:

The mean differences between groups regarding SUR, PMI and LSI are shown in Table 3. There were statistically significant differences between the symptomatic and control shoulders for all the measurements, except for LSI. There was a statistically significant difference in SUR at 45 degrees between symptomatic and asymptomatic shoulders. For the rest of variables there were no significant differences.

|                 | Symptomatic-Asymptomatic shoulder | p     | Symptomatic-Control shoulder | p       |
|-----------------|-----------------------------------|-------|------------------------------|---------|
| SUR<br>At 45°GH | -1,15 (-2,26 to                   | 0.04* | 2,00 (0,96 to                | <0.001* |

|            |                 |      |               |         |
|------------|-----------------|------|---------------|---------|
| abduction  | -0,04)          |      | 3,05)         |         |
| At 90° GH  | -0,67 (-1,90 to | 0.56 | 3,98 (1,68 to | 0.001*  |
| abduction  | 3,94)           |      | 6,27)         |         |
| At 135° GH | 1,02 (-1,90 to  | 0.70 | 8,96 (5,94 to | <0.001* |
| abduction  | 3,94)           |      | 11,98)        |         |
| PMI        | -0,34% (-0,97   | 0.28 | 0,44% (0,04   | 0.03*   |
|            | to 0,29%)       |      | to 0,85%)     |         |
| LSI        | 0,00% (-0,35    | 0.99 | 0.05% (-0,49  | 0.86    |
|            | to 0,35%)       |      | to 0,58%)     |         |

Table 3: Between-group mean differences

\*: statistically significant ( $p < .05$ )

## DISCUSSION

This study aimed to explore potential differences in scapular positioning and scapular pattern of movement between the symptomatic shoulder in patients with chronic SAPS, compared with the contralateral asymptomatic, and control shoulders. We found a decreased SUR in symptomatic shoulder compared to asymptomatic at 45 degrees within the patient group. When comparing symptomatic and control participants, an increased SUR at all positions (45, 90 and 135 degrees) and PMI were found in the symptomatic shoulders. For the rest of comparisons, no significant differences were found.

This is the first study that compares SUR, PMI and LSI between both symptomatic and asymptomatic shoulders in patients with SAPS, and the symptomatic shoulder from

1  
2  
3 patients with control subjects. Previous studies have reported differences in SUR during  
4  
5 arm elevation between the symptomatic and the asymptomatic shoulder [29][16][15],  
6  
7 showing a decreased SUR in the symptomatic shoulders, mainly within the first degrees  
8  
9 of elevation in the scapular plane. This is in line with the present study. Furthermore, a  
10  
11 significantly increased SUR in the symptomatic shoulder of patients when compared  
12  
13 with control subjects was obtained. These differences did surpass the MDC95 of all the  
14  
15 positions (45, 90 and 135 degrees of shoulder elevation). This is not supported by  
16  
17 current literature, which suggests the presence of a decreased SUR in shoulders with  
18  
19 subacromial symptoms compared with healthy controls[30][29][15]. This can be  
20  
21 explained by the fact that patients that were included in our study showed long duration  
22  
23 of shoulder pain, meaning chronicity of symptoms. In this context, the firing pattern of  
24  
25 scapular muscle units can change, generating an early SUR in an attempt to avoid pain,  
26  
27 as has been found in a recent study[31]. It can be hypothesized that early stages of  
28  
29 SAPS could present a deficit in SUR while more advanced stages can develop a  
30  
31 compensatory increased SUR. As this was not measured in this study, further  
32  
33 investigation is needed. In other shoulder conditions, current research analysing SUR  
34  
35 in both symptomatic and pain-free shoulders does not sustain strong conclusions.  
36  
37 Kijima et al.[32] showed absence of differences in SUR, measured by a 3-dimensional  
38  
39 scapular kinematic analysis, between symptomatic, asymptomatic rotator cuff tears and  
40  
41 healthy shoulders. Furthermore, Hung et al.[33] reported no differences in SUR,  
42  
43 measured by 3-dimensional analysis, between patients with glenohumeral instability  
44  
45 and healthy controls.  
46  
47  
48  
49  
50  
51

52 With regard to the pectoralis minor length, there was an absence of statistically  
53  
54 significant difference between the symptomatic and the asymptomatic shoulders,  
55  
56  
57  
58  
59  
60



1  
2  
3 whereas a longer pectoralis minor was found in symptomatic shoulder patient when  
4 compared to control shoulders, but differences were smaller than the MDC95 (0,80).  
5  
6 This finding was contrary to what was expected, since a more anterior tilted positioning  
7 of the scapula is thought to be correlated with a potential risk of SAPS. Our results are  
8 in line with those obtained by Struyf et al.[13] The aforementioned study showed PMI  
9 values of 9.17 (0.54) in the dominant side in the control group, 9.66 (0.68) in the  
10 symptomatic side and 9.64 (0.72) in the asymptomatic side in the patient group, but they  
11 did not study the statistical differences between groups. On the other hand, Lewis et al.  
12 [14]also reported values that analysed pectoral minor length, but comparisons with the  
13 present study are not possible as the test used was different (acromion-table distance  
14 test). To our knowledge there are no studies investigating these potential differences.  
15  
16 Previous studies[11] have found, in healthy subjects with a shortened pectoralis minor,  
17 a similar scapular behaviour to those suffering from SIS. Likewise, pectoral minor  
18 length has a weak positive correlation with the acromiohumeral distance in healthy male  
19 athletes[24], which means that the pectoralis minor could have a slight influence in the  
20 scapular positioning in the case of shortening. However, based on the results obtained in  
21 the present study, and also on previous inconsistent evidence along this line[6][9], the  
22 pectoral minor does not seem to play a key role in patients with chronic SAPS, when  
23 compared to contralateral non-affected shoulders and control subjects.  
24  
25  
26  
27  
28  
29  
30  
31  
32  
33  
34  
35  
36  
37  
38  
39  
40  
41  
42  
43  
44  
45

46 In relation to LS length, there was an absence of differences between symptomatic and  
47 asymptomatic shoulder in patients, and between symptomatic shoulder and controls in  
48 this study. To the best of our knowledge, this is the first study that analyses such  
49 differences between subjects with shoulder symptoms and controls, so comparisons  
50 with others are difficult. It is thought that a shortened LS can produce a scapula more  
51  
52  
53  
54  
55  
56  
57  
58  
59  
60

1  
2  
3 downwardly rotated[12] and, hence, a greater compromise of the subacromial space  
4  
5 during overhead movements. As we did not determine the scapular position in this  
6  
7 study, a conclusion on the absence of differences in levator scapulae length between  
8  
9 different groups cannot be made, thus further studies are needed in this field.  
10

11  
12  
13 Some strong points from this study need to be mentioned. First, the intra-rater reliability  
14  
15 obtained in all the measurements was excellent. Second, an exhaustive ultrasound and  
16  
17 clinical assessment to avoid the inclusion of patients with rotator cuff tears was carried  
18  
19 out. Third, the examiner who assessed all the measurements had an extensive clinical  
20  
21 experience.  
22

23  
24 On the contrary, some limitations need to be recognized. As only one examiner assessed  
25  
26 all the outcome measures, inter-rater reliability was not calculated, so this could  
27  
28 introduce bias. Moreover, as the minimal clinically importance difference for SUR is  
29  
30 unknown, we cannot make a conclusion to whether the differences found in this study  
31  
32 mean a clinical importance or not. Lastly, our results should be taken with caution when  
33  
34 interpreted, as a sample with chronic SAPS was studied, so we do not know if these  
35  
36 results can be extrapolated to other populations, e.g. acute shoulder pain.  
37  
38  
39  
40

41  
42 The present results could have clinical implications, and contribute to increase the body  
43  
44 of knowledge in the field of scapular biomechanics tests. First, it seems that pectoral  
45  
46 minor and/or levator scapulae are not distinguishing factors when comparing the  
47  
48 symptomatic and the contralateral asymptomatic shoulder in subjects suffering from  
49  
50 SAPS. Second, a difference of 1, 15 degrees of SUR between symptomatic and  
51  
52 asymptomatic shoulder in those with chronic SAPS when comparing both at 45° of  
53  
54 shoulder elevation may indicate shoulder dysfunction, and third, the use of the SUR test  
55  
56  
57  
58  
59  
60

1  
2  
3 at 45°, 90° and 135° of shoulder elevation may be useful in the assessment of shoulder  
4  
5 conditions when compared to values from control subjects.  
6  
7

8  
9 Further research that analyses levator scapulae length and scapular positioning, and the  
10  
11 minimal clinically importance difference in SUR, would contribute to enhance  
12  
13 knowledge in this field. Moreover, studies analysing changes in SUR and pectoral  
14  
15 minor length after application of physical therapies are necessary to corroborate their  
16  
17 contribution, as indicators of improvement, when patients with chronic SAPS are  
18  
19 treated.  
20  
21

22 In conclusion, SUR is greater in patients with chronic SAPS when compared with  
23  
24 control volunteers at different angles of shoulder elevation, and is also greater regarding  
25  
26 PMI values at rest position. The usefulness of the present findings is theorized, but  
27  
28 further studies to confirm this in clinical practice are needed.  
29  
30

31 This research did not receive any specific grant from funding agencies in the public,  
32  
33 commercial, or not-for-profit sectors.  
34  
35  
36  
37  
38  
39  
40  
41

## 42 REFERENCES

- 43  
44 1 Herin F, Vézina M, Thaon I, *et al.* Predictors of chronic shoulder pain after 5  
45  
46 years in a working population. *Pain* 2012;**153**:2253–9.  
47  
48 doi:10.1016/j.pain.2012.07.024  
49  
50  
51 2 Luime J, Koes B, Hendriksen I, *et al.* Prevalence and incidence of shoulder pain  
52  
53 in the general population; a systematic review. *Scand J Rheumatol* 2004;**33**:73–  
54  
55 81. doi:16167509  
56  
57  
58  
59  
60

- 1  
2  
3 Bergman GJ, Winters JC, Groenier KH, *et al.* Manipulative Therapy in Addition  
4 to Usual Care for Patients With Shoulder Complaints: Results of Physical  
5 Examination Outcomes in a Randomized Controlled Trial. *J Manipulative*  
6 *Physiol Ther* 2010;**33**:96–101. doi:10.1016/j.jmpt.2009.12.004  
7  
8  
9  
10  
11 4 Roquelaure Y, Ha C, Leclerc A, *et al.* Epidemiologic surveillance of upper-  
12 extremity musculoskeletal disorders in the working population. *Arthritis Care*  
13 *Res* 2006;**55**:765–78. doi:10.1002/art.22222  
14  
15  
16  
17  
18 5 Linsell L, Dawson J, Zondervan K, *et al.* Prevalence and incidence of adults  
19 consulting for shoulder conditions in UK primary care; patterns of diagnosis and  
20 referral. *Rheumatology* 2006;**45**:215–21. doi:10.1093/rheumatology/kei139  
21  
22  
23  
24 6 Ratcliffe E, Pickering S, Mclean S, *et al.* Is there a relationship between  
25 subacromial impingement syndrome and scapular orientation? A systematic  
26 review. *Br J Sport Med* 2014;**48**:1251–6. doi:10.1136/bjsports-2013-092389  
27  
28  
29  
30  
31 7 McCreesh KM, Crotty JM, Lewis JS. Acromiohumeral distance measurement in  
32 rotator cuff tendinopathy: is there a reliable, clinically applicable method? A  
33 systematic review. *Br J Sports Med* 2013;:298–305. doi:10.1136/bjsports-2012-  
34 092063  
35  
36  
37  
38  
39 8 van der Windt DA, Koes BW, Boeke AJ, *et al.* Shoulder disorders in general  
40 practice: prognostic indicators of outcome. *Br J Gen Pract* 1996;**46**:519–23.  
41  
42  
43  
44 9 Timmons MK, Thigpen CA, Seitz AL, *et al.* Scapular Kinematics and  
45 Subacromial-Impingement Syndrome : A Meta-Analysis. 2012;:354–70.  
46  
47  
48 10 Kibler WB, Ludewig PM, McClure PW, *et al.* Clinical implications of scapular  
49 dyskinesis in shoulder injury: the 2013 consensus statement from the ‘scapular  
50 summit’. *Br J Sports Med* 2013;**47**:877–85. doi:10.1136/bjsports-2013-092425  
51  
52  
53  
54 11 Borstad JD, Ludewig PM. The effect of long versus short pectoralis minor resting  
55  
56  
57  
58  
59  
60

- 1  
2  
3 length on scapular kinematics in healthy individuals. *J Orthop Sports Phys Ther*  
4 2005;**35**:227–38. doi:10.2519/jospt.2005.35.4.227  
5  
6  
7 12 Lee JH, Cynn HS, Choi WJ, *et al.* Reliability of levator scapulae index in  
8 subjects with and without scapular downward rotation syndrome. *Phys Ther*  
9 *Sport* 2016;**19**:1–6. doi:10.1016/j.ptsp.2015.07.002  
10  
11  
12  
13 13 Struyf F, Meeus M, Franssen E, *et al.* Interrater and intrarater reliability of the  
14 pectoralis minor muscle length measurement in subjects with and without  
15 shoulder impingement symptoms. *Man Ther* 2014;:1–5.  
16 doi:10.1016/j.math.2014.04.005  
17  
18  
19  
20  
21  
22 14 Lewis JS, Valentine RE. The pectoralis minor length test : a study of the intra-  
23 rater reliability symptoms. *BMC Musculoskelet Disord* 2007;**10**:1–10.  
24 doi:10.1186/1471-2474-8-64  
25  
26  
27  
28  
29 15 Struyf F, Nijs J, Baeyens JP, *et al.* Scapular positioning and movement in  
30 unimpaired shoulders, shoulder impingement syndrome, and glenohumeral  
31 instability. *Scand J Med Sci Sport* 2011;**21**:352–8. doi:10.1111/j.1600-  
32 0838.2010.01274.x  
33  
34  
35  
36  
37 16 Ellenbecker TS, Cools A. Rehabilitation of shoulder impingement syndrome and  
38 rotator cuff injuries: an evidence-based review. *Br J Sports Med* 2010;**44**:319–27.  
39 doi:10.1136/bjism.2009.058875  
40  
41  
42  
43  
44 17 Struyf F, Nijs J, Mottram S, *et al.* Clinical assessment of the scapula: a review of  
45 the literature. *Br J Sports Med* 2014;**48**:883–90. doi:10.1136/bjsports-2012-  
46 091059  
47  
48  
49  
50 18 Larsen CM, Juul-kristensen B, Lund H, *et al.* Measurement properties of existing  
51 clinical assessment methods evaluating scapular positioning and function . A  
52 systematic review. 2014;**3985**:453–82. doi:10.3109/09593985.2014.899414  
53  
54  
55  
56  
57  
58  
59

- 1  
2  
3 19 Groef A De, Kampen M Van, Vervloesem N, *et al.* *Ac ce pt us t. Physiotherapy*  
4  
5 Published Online First: 2016. doi:10.1016/j.physio.2016.07.002  
6  
7 20 Kibler W Ben, Sciascia A. Current concepts : scapular dyskinesis Current  
8  
9 concepts : scapular dyskinesis. *Sport Med* 2010;:300–5.  
10  
11 doi:10.1136/bjism.2009.058834  
12  
13 21 Cools a M, Cambier D, Witvrouw EE. Screening the athlete’s shoulder for  
14  
15 impingement symptoms: a clinical reasoning algorithm for early detection of  
16  
17 shoulder pathology. *Br J Sports Med* 2008;**42**:628–35.  
18  
19  
20 22 Engebretsen K, Grotle M, Bautz-Holter E, Ekeberg OM BJ. Predictors of  
21  
22 shoulder pain and disability index (SPADI) and work status after 1 year in  
23  
24 patients with subacromial shoulder pain. *BMC Musculoskelet Disord*  
25  
26 2010;**11**:218.  
27  
28  
29 23 Watson L, Balster S, Finch C, *et al.* Measurement of scapula upward rotation: a  
30  
31 reliable clinical procedure. *Br J Sports Med* 2005;**39**:599–603.  
32  
33 doi:10.1136/bjism.2004.013243  
34  
35 24 Tanya Mackenzie, Lee Herrington, Lenard Funk AC. Relationship between  
36  
37 extrinsic factors and acromio-humeral distance. *Man Ther* Published Online  
38  
39 First: 2016. doi:10.1016/j.math.2016.02.005  
40  
41  
42 25 Roach KE, Budiman-Mak E, Songsiridej N, *et al.* Development of a shoulder  
43  
44 pain and disability index. *Arthritis Care Res* 1991;**4**:143–9.  
45  
46 doi:10.1002/art.1790040403  
47  
48 26 MacDermid JC, Solomon P, Prkachin K. The Shoulder Pain and Disability Index  
49  
50 demonstrates factor, construct and longitudinal validity. *BMC Musculoskelet*  
51  
52 *Disord* 2006;**7**:12. doi:10.1186/1471-2474-7-12  
53  
54  
55 27 Membrilla-Mesa MD, Cuesta-Vargas AI, Pozuelo-Calvo R, *et al.* Shoulder pain  
56  
57  
58  
59  
60

- 1  
2  
3 and disability index: Cross cultural validation and evaluation of psychometric  
4 properties of the Spanish version. *Health Qual Life Outcomes* 2015;**13**:1–6.  
5  
6 doi:10.1186/s12955-015-0397-z  
7  
8  
9 28 Portney LG, Watkins MP. Statistical measures of reliability. In: *Foundations of*  
10  
11 *clinical research : applications to practice*. 2000. 557–86.  
12  
13 29 Turgut E, Duzgun I, Baltaci G. Scapular asymmetry in participants with and  
14  
15 without shoulder impingement syndrome; a three-dimensional motion analysis.  
16  
17 *Clin Biomech* 2016;**39**:1–8. doi:10.1016/j.clinbiomech.2016.09.001  
18  
19  
20 30 Ludewig PM, Cook TM. Alterations in Shoulder Kinematics and Associated  
21  
22 Muscle Activity in People With Symptoms of Shoulder Impingement Research  
23  
24 Report Alterations in Shoulder Kinematics and Associated Muscle Activity in  
25  
26 People With. *Phys Ther* 2000;**80**:276–91.  
27  
28  
29 31 Michener LA, Sharma S, Cools AM, *et al*. Relative scapular muscle activity  
30  
31 ratios are altered in subacromial pain syndrome. *J Shoulder Elb Surg* Published  
32  
33 Online First: 2016. doi:10.1016/j.jse.2016.04.010  
34  
35 32 Kijima T, Matsuki K, Ochiai N, *et al*. In vivo 3-dimensional analysis of scapular  
36  
37 and glenohumeral kinematics : comparison of symptomatic or asymptomatic  
38  
39 shoulders with rotator cuff tears and healthy shoulders. *J Shoulder Elb Surg*  
40  
41 2015;**24**:1817–26. doi:10.1016/j.jse.2015.06.003  
42  
43  
44 33 Hung Y, Darling WG. Scapular Orientation During Planar and Three-  
45  
46 dimensional Upper Limb Movements in Individuals with Anterior Glenohumeral  
47  
48 Joint Instability. Published Online First: 2013. doi:10.1002/pri.1558  
49  
50  
51  
52  
53  
54  
55  
56  
57  
58  
59  
60

1  
2  
3 LEGENDS

4 Figure 1: Scapular upward rotation measurement.

6  
7 Figure 2: Pectoral minor length measurement.

8  
9 Figure 3: Levator scapulae length measurement.  
10  
11  
12  
13  
14  
15  
16  
17  
18  
19  
20  
21  
22  
23  
24  
25  
26  
27  
28  
29  
30  
31  
32  
33  
34  
35  
36  
37  
38  
39  
40  
41  
42  
43  
44  
45  
46  
47  
48  
49  
50  
51  
52  
53  
54  
55  
56  
57  
58  
59  
60



1  
2  
3  
4  
5  
6  
7  
8  
9  
10  
11  
12  
13  
14  
15  
16  
17  
18  
19  
20  
21  
22  
23  
24  
25  
26  
27  
28  
29  
30  
31  
32  
33  
34  
35  
36  
37  
38  
39  
40  
41  
42  
43  
44  
45  
46  
47  
48  
49  
50  
51  
52  
53  
54  
55  
56  
57  
58  
59  
60

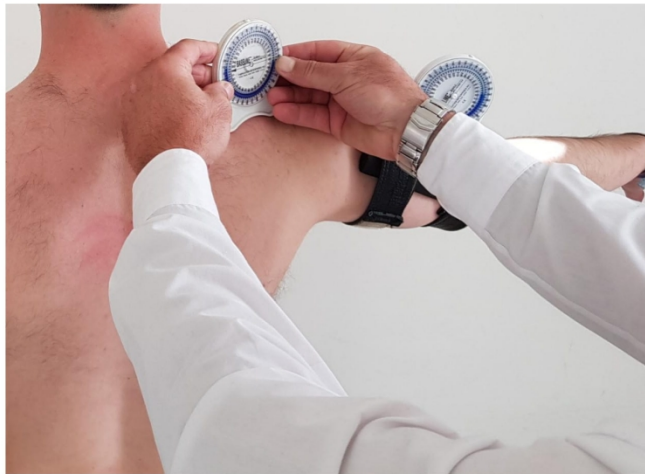

583x825mm (72 x 72 DPI)

1  
2  
3  
4  
5  
6  
7  
8  
9  
10  
11  
12  
13  
14  
15  
16  
17  
18  
19  
20  
21  
22  
23  
24  
25  
26  
27  
28  
29  
30  
31  
32  
33  
34  
35  
36  
37  
38  
39  
40  
41  
42  
43  
44  
45  
46  
47  
48  
49  
50  
51  
52  
53  
54  
55  
56  
57  
58  
59  
60

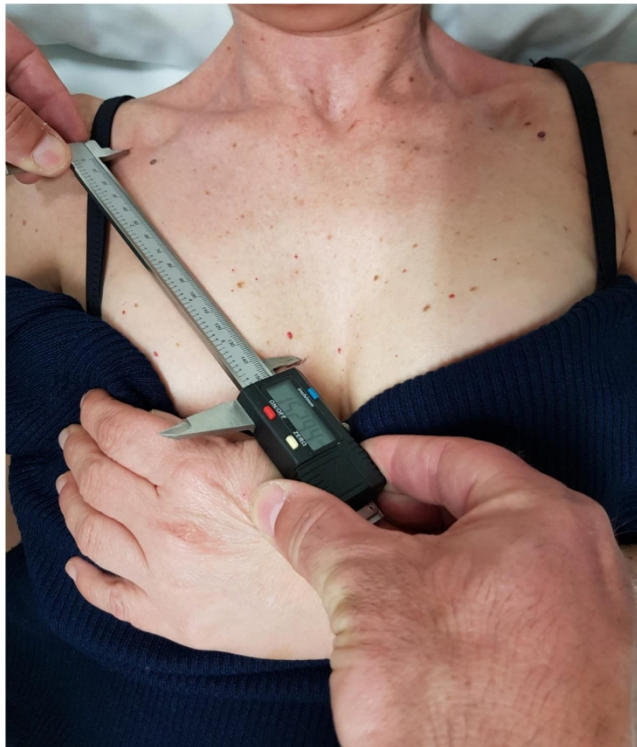

583x825mm (72 x 72 DPI)

1  
2  
3  
4  
5  
6  
7  
8  
9  
10  
11  
12  
13  
14  
15  
16  
17  
18  
19  
20  
21  
22  
23  
24  
25  
26  
27  
28  
29  
30  
31  
32  
33  
34  
35  
36  
37  
38  
39  
40  
41  
42  
43  
44  
45  
46  
47  
48  
49  
50  
51  
52  
53  
54  
55  
56  
57  
58  
59  
60

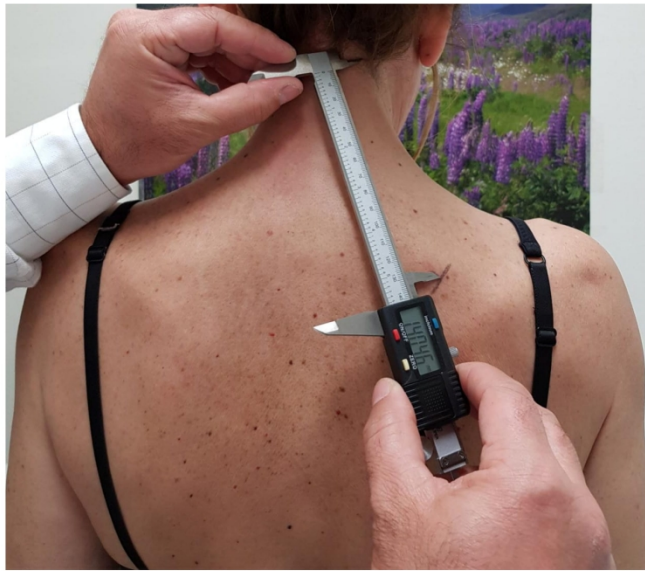

583x825mm (72 x 72 DPI)

## STROBE Statement—checklist of items that should be included in reports of observational studies

|                              | Item No | Recommendation                                                                                                                                                                                                                                                                                                                                                                                                                                                                                                                                                                                                                                                                                                 |
|------------------------------|---------|----------------------------------------------------------------------------------------------------------------------------------------------------------------------------------------------------------------------------------------------------------------------------------------------------------------------------------------------------------------------------------------------------------------------------------------------------------------------------------------------------------------------------------------------------------------------------------------------------------------------------------------------------------------------------------------------------------------|
| <b>Title and abstract</b>    | 1       | (a) Indicate the study's design with a commonly used term in the title or the abstract<br>(b) Provide in the abstract an informative and balanced summary of what was done and what was found <b>PAGE 1</b>                                                                                                                                                                                                                                                                                                                                                                                                                                                                                                    |
| <b>Introduction</b>          |         |                                                                                                                                                                                                                                                                                                                                                                                                                                                                                                                                                                                                                                                                                                                |
| Background/rationale         | 2       | Explain the scientific background and rationale for the investigation being reported <b>PAGE 3</b>                                                                                                                                                                                                                                                                                                                                                                                                                                                                                                                                                                                                             |
| Objectives                   | 3       | State specific objectives, including any prespecified hypotheses <b>PAGE 4</b>                                                                                                                                                                                                                                                                                                                                                                                                                                                                                                                                                                                                                                 |
| <b>Methods</b>               |         |                                                                                                                                                                                                                                                                                                                                                                                                                                                                                                                                                                                                                                                                                                                |
| Study design                 | 4       | Present key elements of study design early in the paper <b>PAGE 4</b>                                                                                                                                                                                                                                                                                                                                                                                                                                                                                                                                                                                                                                          |
| Setting                      | 5       | Describe the setting, locations, and relevant dates, including periods of recruitment, exposure, follow-up, and data collection <b>PAGE 4</b>                                                                                                                                                                                                                                                                                                                                                                                                                                                                                                                                                                  |
| Participants                 | 6       | (a) <i>Cohort study</i> —Give the eligibility criteria, and the sources and methods of selection of participants. Describe methods of follow-up<br><i>Case-control study</i> —Give the eligibility criteria, and the sources and methods of case ascertainment and control selection. Give the rationale for the choice of cases and controls<br><i>Cross-sectional study</i> —Give the eligibility criteria, and the sources and methods of selection of participants<br>(b) <i>Cohort study</i> —For matched studies, give matching criteria and number of exposed and unexposed<br><i>Case-control study</i> —For matched studies, give matching criteria and the number of controls per case <b>PAGE 5</b> |
| Variables                    | 7       | Clearly define all outcomes, exposures, predictors, potential confounders, and effect modifiers. Give diagnostic criteria, if applicable <b>PAGE 6-7-8</b>                                                                                                                                                                                                                                                                                                                                                                                                                                                                                                                                                     |
| Data sources/<br>measurement | 8*      | For each variable of interest, give sources of data and details of methods of assessment (measurement). Describe comparability of assessment methods if there is more than one group <b>PAGE 6-7-8</b>                                                                                                                                                                                                                                                                                                                                                                                                                                                                                                         |
| Bias                         | 9       | Describe any efforts to address potential sources of bias <b>PAGE 8</b>                                                                                                                                                                                                                                                                                                                                                                                                                                                                                                                                                                                                                                        |
| Study size                   | 10      | Explain how the study size was arrived at <b>PAGE 9</b>                                                                                                                                                                                                                                                                                                                                                                                                                                                                                                                                                                                                                                                        |
| Quantitative variables       | 11      | Explain how quantitative variables were handled in the analyses. If applicable, describe which groupings were chosen and why <b>PAGE 9</b>                                                                                                                                                                                                                                                                                                                                                                                                                                                                                                                                                                     |
| Statistical methods          | 12      | (a) Describe all statistical methods, including those used to control for confounding<br>(b) Describe any methods used to examine subgroups and interactions <b>PAGE 9</b><br>(c) Explain how missing data were addressed<br>(d) <i>Cohort study</i> —If applicable, explain how loss to follow-up was addressed<br><i>Case-control study</i> —If applicable, explain how matching of cases and controls was addressed<br><i>Cross-sectional study</i> —If applicable, describe analytical methods taking account of sampling strategy<br>(e) Describe any sensitivity analyses                                                                                                                                |

Continued on next page

**Results**

|                  |     |                                                                                                                                                                                                                                                                                                                                                                                                                                 |
|------------------|-----|---------------------------------------------------------------------------------------------------------------------------------------------------------------------------------------------------------------------------------------------------------------------------------------------------------------------------------------------------------------------------------------------------------------------------------|
| Participants     | 13* | (a) Report numbers of individuals at each stage of study—eg numbers potentially eligible, examined for eligibility, confirmed eligible, included in the study, completing follow-up, and analysed <b>PAGE 9-12</b><br>(b) Give reasons for non-participation at each stage<br>(c) Consider use of a flow diagram                                                                                                                |
| Descriptive data | 14* | (a) Give characteristics of study participants (eg demographic, clinical, social) and information on exposures and potential confounders <b>PAGE 10</b><br>(b) Indicate number of participants with missing data for each variable of interest<br>(c) <i>Cohort study</i> —Summarise follow-up time (eg, average and total amount)                                                                                              |
| Outcome data     | 15* | <i>Cohort study</i> —Report numbers of outcome events or summary measures over time<br><i>Case-control study</i> —Report numbers in each exposure category, or summary measures of exposure <b>PAGE 9-12</b><br><i>Cross-sectional study</i> —Report numbers of outcome events or summary measures                                                                                                                              |
| Main results     | 16  | (a) Give unadjusted estimates and, if applicable, confounder-adjusted estimates and their precision (eg, 95% confidence interval). Make clear which confounders were adjusted for and why they were included <b>PAGE 11-12</b><br>(b) Report category boundaries when continuous variables were categorized<br>(c) If relevant, consider translating estimates of relative risk into absolute risk for a meaningful time period |
| Other analyses   | 17  | Report other analyses done—eg analyses of subgroups and interactions, and sensitivity analyses                                                                                                                                                                                                                                                                                                                                  |

**Discussion**

|                  |    |                                                                                                                                                                                              |
|------------------|----|----------------------------------------------------------------------------------------------------------------------------------------------------------------------------------------------|
| Key results      | 18 | Summarise key results with reference to study objectives <b>PAGE 12</b>                                                                                                                      |
| Limitations      | 19 | Discuss limitations of the study, taking into account sources of potential bias or imprecision. Discuss both direction and magnitude of any potential bias <b>PAGE 15</b>                    |
| Interpretation   | 20 | Give a cautious overall interpretation of results considering objectives, limitations, multiplicity of analyses, results from similar studies, and other relevant evidence <b>PAGE 12-14</b> |
| Generalisability | 21 | Discuss the generalisability (external validity) of the study results <b>PAGE 15-16</b>                                                                                                      |

**Other information**

|         |    |                                                                                                                                                                                     |
|---------|----|-------------------------------------------------------------------------------------------------------------------------------------------------------------------------------------|
| Funding | 22 | Give the source of funding and the role of the funders for the present study and, if applicable, for the original study on which the present article is based <b>NON APPLICABLE</b> |
|---------|----|-------------------------------------------------------------------------------------------------------------------------------------------------------------------------------------|

\*Give information separately for cases and controls in case-control studies and, if applicable, for exposed and unexposed groups in cohort and cross-sectional studies.

**Note:** An Explanation and Elaboration article discusses each checklist item and gives methodological background and published examples of transparent reporting. The STROBE checklist is best used in conjunction with this article (freely available on the Web sites of PLoS Medicine at <http://www.plosmedicine.org/>, Annals of Internal Medicine at <http://www.annals.org/>, and Epidemiology at <http://www.epidem.com/>). Information on the STROBE Initiative is available at [www.strobe-statement.org](http://www.strobe-statement.org).

# BMJ Open

## Differences in scapular upward rotation, pectoralis minor and levator scapulae muscle length between the symptomatic, the contralateral asymptomatic shoulder and control subjects: A cross-sectional study

|                                 |                                                                                                                                                                                                                                                                                                                                                                      |
|---------------------------------|----------------------------------------------------------------------------------------------------------------------------------------------------------------------------------------------------------------------------------------------------------------------------------------------------------------------------------------------------------------------|
| Journal:                        | <i>BMJ Open</i>                                                                                                                                                                                                                                                                                                                                                      |
| Manuscript ID                   | bmjopen-2018-023020.R1                                                                                                                                                                                                                                                                                                                                               |
| Article Type:                   | Research                                                                                                                                                                                                                                                                                                                                                             |
| Date Submitted by the Author:   | 07-Aug-2018                                                                                                                                                                                                                                                                                                                                                          |
| Complete List of Authors:       | Navarro-Ledesma, Santiago; University of Granada, Physiotherapy<br>Fernandez-Sanchez, Manuel; Universidad De Almeria Facultad de Ciencias de la Educacion Enfermeria y Fisioterapia<br>STRUYF, FILIP; Universiteit Antwerpen Campus Drie Eiken, REHABILITATION SCIENCES<br>Martinez-Calderon, Javier<br>LUQUE-SUAREZ, ALEJANDRO; UNIVERSITY OF MALAGA, PHYSIOTHERAPY |
| <b>Primary Subject Heading</b>: | Rehabilitation medicine                                                                                                                                                                                                                                                                                                                                              |
| Secondary Subject Heading:      | Sports and exercise medicine                                                                                                                                                                                                                                                                                                                                         |
| Keywords:                       | scapular kinematic, shoulder pain, chronic pain                                                                                                                                                                                                                                                                                                                      |
|                                 |                                                                                                                                                                                                                                                                                                                                                                      |

SCHOLARONE™  
Manuscripts

1  
2  
3 **Differences in scapular upward rotation, pectoralis minor and levator scapulae**  
4 **muscle length between the symptomatic, the contralateral asymptomatic shoulder**  
5 **and control subjects: A cross-sectional study.**  
6  
7  
8

9  
10 Navarro-Ledesma S\*; Fernandez-Sanchez M; Struyf F; Martinez-Calderon J; Luque-  
11 Suarez A  
12

13  
14  
15 Corresponding author:

16  
17 Santiago Navarro-Ledesma (snl@ugr.es)

18  
19 Av. de la Ilustración, 60, 18016 Urb. los Vergeles, Granada, Spain

20  
21 00 34 951 952 853  
22  
23

24  
25  
26 Santiago Navarro-Ledesma

27  
28 Department of Physiotherapy, University of Granada, Spain  
29

30  
31  
32 Manuel Fernandez-Sanchez

33  
34 Department of Nursing, Physiotherapy and Medicine, University of Almeria, Spain  
35  
36

37  
38  
39 Filip Struyf

40  
41 Department of Rehabilitation Sciences and Physiotherapy, University of Antwerp,  
42

43 Antwerpen, Belgium  
44  
45

46  
47 Javier Martinez-Calderon

48  
49 Department of Physiotherapy, University of Malaga, Spain  
50  
51

52  
53  
54  
55  
56 Alejandro Luque-Suarez  
57  
58

1  
2  
3 Department of Physiotherapy, University of Malaga, Spain  
4  
5

6  
7 Keywords: scapular kinematic; shoulder pain; chronic pain  
8  
9

10 Word count: 3523  
11  
12  
13  
14  
15  
16  
17  
18  
19  
20

## 21 **ABSTRACT**

22  
23  
24 Objective: To determine the potential differences in both scapular positioning and  
25 scapular movement between the symptomatic and asymptomatic contralateral shoulder,  
26 in patients with unilateral subacromial pain syndrome (SAPS), and in comparison with  
27 those of participants free of shoulder pain.  
28  
29  
30  
31  
32

33  
34 Setting: Three different primary care centres.  
35  
36

37 Participants: A sample of seventy-three patients with SAPS in their dominant arm was  
38 recruited, with a final sample size of fifty-four participants.  
39  
40  
41

42 Primary outcome measures: The scapular upward rotation (SUR), the pectoralis minor  
43 and the levator scapulae muscles length tests were carried out.  
44  
45  
46

47 Results: We found a decreased SUR in symptomatic shoulder compared to contralateral  
48 asymptomatic at 45 degrees of shoulder elevation (-1,15 degrees). When symptomatic  
49 shoulders and control subjects were compared, an increased SUR at all positions (45, 90  
50 and 135 degrees) was obtained in symptomatic shoulders (2/ 3,98/ 8,96 degrees  
51 respectively). These differences in SUR did surpass the minimal detectable change  
52  
53  
54  
55  
56  
57  
58  
59  
60



1  
2  
3 (MDC95) (0,91/1,55/2,83 degrees at 45/90/135 degrees of shoulder elevation). For the  
4  
5 rest of the comparisons, no significant differences were found.  
6

7  
8 Conclusions: Scapular upward rotation is greater in patients with chronic SAPS  
9  
10 compared with control volunteers at different angles of shoulder elevation, while is  
11  
12 decreased when compared to asymptomatic shoulder at 45° of shoulder elevation. No  
13  
14 differences were found in both pectoralis minor and levator scapulae muscle length  
15  
16 between all the groups.  
17

18  
19 Keywords: scapular kinematic; shoulder pain; chronic pain  
20  
21  
22  
23  
24

### 25 **Strengths and limitations of this study**

26  
27  
28 The intra-rater reliability obtained in all the measurements was excellent.  
29

30  
31 An exhaustive ultrasound and clinical assessment to avoid the inclusion of patients with  
32  
33 rotator cuff tears was carried out.  
34

35  
36 The examiner who assessed all the measurements had an extensive clinical experience.  
37

38 The inter-rater reliability was not calculated, so this could introduce bias.  
39

40  
41 The minimal clinically importance difference for SUR is unknown, thus we cannot  
42  
43 make a conclusion to whether the differences found in this study mean a clinical  
44  
45 importance or not.  
46  
47  
48  
49  
50  
51  
52  
53

## 54 **INTRODUCTION**

55  
56  
57  
58  
59  
60

1  
2  
3  
4  
5  
6  
7  
8  
9  
10  
11  
12  
Shoulder pain is the most common musculoskeletal condition after neck pain and low  
back pain[1]. Shoulder pain point prevalence figures range from 6.9 to 26%, from 18.6  
to 31% for 1-month prevalence, from 4.7 to 46.7% for 1-year prevalence, and from 6.7  
to 66.7% for lifetime prevalence[2]. Furthermore, shoulder pain prevalence is even  
higher in women[3], in the working population[4], and increases with age[5].

13  
14  
15  
16  
17  
18  
19  
20  
21  
22  
23  
24  
25  
26  
27  
28  
29  
30  
31  
32  
33  
34  
35  
36  
37  
38  
39  
40  
41  
42  
43  
44  
45  
46  
47  
Subacromial pain syndrome (SAPS) is the most common cause of shoulder pain[6,7]. It  
is defined as a non-traumatic, usually unilateral, shoulder problem that causes pain  
localized around the acromion, often worsening during or subsequent to lifting of the  
arm[8]. The best therapeutic approach in SAPS is still under debate. Half of the patients  
with shoulder pain who present in primary care do not completely recover after 6  
months from their first episode[9], so there is a need to explore different non-invasive  
strategies in these patients. One of the approaches that can be beneficial for the patient  
is focused on the scapulothoracic joint. To date, there is inconsistent evidence to support  
a relationship between SAPS symptoms and scapular orientation[10][6]. The most  
common causative mechanisms of an altered scapular positioning involves the soft  
tissue, such as inflexibility (tightness) and alterations in the periscapular muscles[11].  
Specifically, both a decreased activation and strength of serratus anterior, as well as  
alterations in upper trapezius/lower trapezius couple force, can alter scapular upward  
rotation and posterior tilt [11]. Likewise, pectoralis minor and levator scapulae muscles  
[12,13], and biceps short head [11] have been traditionally assessed as their shortening  
may potentially influence scapular positioning.

48  
49  
50  
51  
52  
53  
54  
55  
56  
57  
58  
59  
60  
Previous studies have reported normative values on pectoralis minor length in the  
dominant and non-dominant side in both symptomatic and control populations, by using  
the pectoralis minor index [14], and the acromion-table distance test [15]. Recently,  
pectoralis minor length and its shortening have received remarkable empirical attention,

1  
2  
3 in terms of reliability study[16], association with shoulder external rotation[17], and as  
4  
5 an outcome measurement after a stretching program in participants with shoulder  
6  
7 pain[18]. However, differences between symptomatic groups and healthy controls were  
8  
9 not calculated. To the best of our knowledge, differences in levator scapulae index (LSI)  
10  
11 between symptomatic and control populations have not been determined. With regard to  
12  
13 patterns of movement, there is conflicting evidence. While some studies have shown  
14  
15 association between a reduced both scapular upward rotation (SUR) and scapular  
16  
17 posterior tilt in SAPS [19,20], others did attain inconclusive findings[6,10].

18  
19  
20 Advanced equipment to assess scapular positioning and kinematics exist, nevertheless,  
21  
22 most of them are very technical and highly expensive, which makes them almost  
23  
24 unattainable in the clinical practice[21]. In this regard, research states that the SUR  
25  
26 seems suitably evidence-based for clinical use, while the pectoralis minor length test  
27  
28 should be used as a supplementary clinical assessment method in addition to other  
29  
30 assessment methods[22,23]. Likewise, the levator scapulae muscle length test has been  
31  
32 shown to be a reliable tool, and it has been proposed as part of the scapula assessment  
33  
34 because the levator scapulae directly attaches in the superior angle of the scapula[13]  
35  
36 and thus it is another possible cause of scapular dysfunction[24].  
37  
38  
39  
40

41  
42 There is lack of evidence on the potential differences in PMI, LSI and SUR, between  
43  
44 painful and contralateral non-painful shoulders, and controls subjects. The existence of  
45  
46 differences in scapular positioning and pattern of movement could contribute to steer  
47  
48 physiotherapy treatments towards a scapular focused treatment approach.

49  
50 Hence, the aim of this study was to analyse the differences in scapular positioning and  
51  
52 pattern of movement, between the symptomatic and asymptomatic shoulder, in patients  
53  
54 with unilateral chronic SAPS, and in control subjects, using three different tests: i)

1  
2  
3 scapular upward rotation, ii) pectoralis minor muscle length and, iii) levator scapulae  
4  
5 muscle length. The null hypothesis ( $H_0$ ) was that there are no differences in these three  
6  
7 different tests between groups. The alternative hypothesis ( $H_a$ ) was that there are  
8  
9 significant differences in these three tests between groups.

## 11 **METHOD**

### 13 Study design

15 This was a cross-sectional, observational study, carried out in accordance with the  
16  
17 Declaration of Helsinki. Ethical approval was obtained from the Ethics Committee of  
18  
19 the Health Care District where the primary care centres were located (PI9/012014). The  
20  
21 study has been reported following the recommendations of the STROBE statement for  
22  
23 observational studies.  
24  
25  
26  
27  
28  
29

### 31 Patient and Public Involvement

32  
33 General practitioners (GPs) carried out the recruitment, and all participants, who had to  
34  
35 sign an informed consent, were screened for eligibility and informed about the research  
36  
37 project by a research assistant. The participation of all subjects was voluntary,  
38  
39 and no incentives were given to encourage enrollment. All measurements were taken by  
40  
41 a physiotherapist with more than 25 years of experience, including height which was  
42  
43 necessary to calculate PMI and LSI values. This physiotherapist was blinded to the fact  
44  
45 of participants having shoulder pain or not.  
46  
47

48 The results of the present study were sent by e-mail to those participants who wanted to  
49  
50 be informed.  
51  
52  
53

### 54 Participants

1  
2  
3 A sample of seventy-three patients with chronic SAPS in their dominant arm was  
4 recruited from three different primary care centres, with a final sample size of fifty-four  
5 participants obtained after applying the inclusion criteria. Participants had to meet the  
6 following inclusion criteria: (i) men or women aged between 18 to 55 years; (ii)  
7 unilateral pain located in the anterior and/or lateral shoulder region[8]; (iii) 2 out of 3  
8 positive clinical tests (Hawkins-Kennedy; Jobe; Neer)[25]; (iv) pain with normal  
9 activity  $\geq 4/10$  on a visual analogue scale; (v) shoulder pain lasting more than three  
10 months; (vi) a history of nontraumatic onset of shoulder pain. Participants were  
11 ineligible to participate in this study if any of these conditions were present: (i) history  
12 of significant shoulder trauma, such as fracture or ultrasonography-clinically suspected  
13 full thickness cuff tear, following the classification of Wiener and Seitz, 1993[26]; (ii)  
14 recent shoulder dislocation in the past two years; (iii) systemic illnesses such as  
15 rheumatoid arthritis; (iv) adhesive capsulitis; (v) shoulder pain originating from the  
16 neck or if there was a neurological impairment, osteoporosis, haemophilia and/or  
17 malignancies.  
18  
19  
20  
21  
22  
23  
24  
25  
26  
27  
28  
29  
30  
31  
32  
33  
34  
35  
36

37 A sample of 54 participants with both shoulders free of pain for the last year was  
38 selected. They were recruited from the same three primary care centres as the  
39 participants with shoulder pain. Furthermore, to participate in the study, they had to  
40 present: (i) a SPADI score  $\leq 15$  points, based on the minimal clinically detectable  
41 change for this tool[27]; (ii) negative results for Neer test, Hawkins-Kennedy test and  
42 Jobe test; (iii) no painful arc present during flexion or abduction; (iv) no pain during  
43 resisted lateral rotation and/or abduction. Asymptomatic participants were specifically  
44 age and gender matched to the symptomatic group.  
45  
46  
47  
48  
49  
50  
51  
52  
53  
54  
55  
56  
57  
58  
59  
60

## Outcome measurements

### *Scapular upward rotation*

The measurement of SUR was performed using two Plurimeter-V gravity reference inclinometers[28]. One inclinometer was Velcro taped perpendicular to the humeral shaft, just above the humeral epicondyle. At resting position, the humeral inclinometer was calibrated as 0 degrees. Next, the patients were instructed to perform shoulder abduction in the coronal plane with full elbow extension and 45° of external humeral rotation, with the thumb abducted. The patients were asked to stop at 45°, 90° and 135° degrees of humeral abduction, where the SUR was measured with a second inclinometer, manually aligned along the scapular spine (Figure 1). Three measurements were collected at each position and then the mean was obtained. The arm was repositioned between measurements.

### #FIGURE 1

### *Pectoralis minor length*

The measurement of the pectoral minor length was carried out with the participant in the supine position. A small pillow was placed under the participant's head for comfort. The participant's arm was passively placed along the side of the body in the neutral position resting on the table[29]. Because of the variability among subjects this measurement was best normalized creating a pectoralis minor index (PMI), which was calculated by dividing the resting muscle length measurement by the subject height and multiplying by 100, as previously described by Borstad et al [12]. Height was measured with the patient in a standing position, by using a calliper placed at the top of the head and marking a point on a scale placed on the wall. The resting muscle length was measured from the caudal edge of the 4<sup>th</sup> rib to the inferomedial aspect of the coracoid process with a sliding calliper (Figure 2). Pectoralis minor index values less than 7.65

1  
2  
3 have been identified as a shortened pectoralis minor[12]. The measurement was taken  
4  
5 during inspiration[14].

6  
7 #FIGURE 2

8  
9 *Levator scapulae length*

10  
11 Participants were standing with their arms relaxed at their sides. The subjects were  
12  
13 asked to look directly ahead without craniocervical movement[13]. The instruction was  
14  
15 to palpate two anatomical reference points in line that represent levator scapulae length:  
16  
17 (1) the dorsal tubercles of the transverse processes of the second cervical vertebrae and  
18  
19 (2) the superior angle of the medial borders of the scapula. The assessor used a skin-  
20  
21 marker pencil to mark the reference points. The marks were cleaned immediately after  
22  
23 each test session. The distance between these two bony reference points was measured  
24  
25 with a sliding calliper (Figure 3). By creating an LSI (levator scapulae length  
26  
27 [cm]/subjects' height [cm]\*100), the subjects' variability in body height was  
28  
29 normalized[13]. The LSI was expressed as a percentage of the subjects' height.  
30  
31

32  
33 # FIGURE 3

34  
35 The Shoulder Pain and Disability Index (SPADI) was assessed in all participants. The  
36  
37 SPADI is composed of 13 questions and contains two domains: pain and disability. The  
38  
39 score of the questionnaire ranges from 0 to 100, with very high scores indicating worse  
40  
41 function. The numeric pain scale runs from 0 to 10, with 0 indicating no pain and 10  
42  
43 representing the worst pain[30]. The SPADI has shown a good internal consistency with  
44  
45 a Cronbach's alpha of 0.95 for the total score, 0.92 for the pain subscale and 0.93 for the  
46  
47 disability subscale as well as the ability to detect change over time[31]. A Spanish  
48  
49 version of the SPADI was used since English was not the native language for all the  
50  
51 participants[32].  
52  
53  
54  
55  
56  
57  
58  
59  
60

## Data analysis

The Statistical Package for the Social Sciences (version 23.0 for Mac; SPSS Inc. Chicago, IL) was used to analyse the collected data. Normality for all variables was explored using the Kolmogorov Smirnov test for the group of participants with shoulder pain (affected and non-affected), and for the control subjects. To determine whether there were differences between groups for all the outcome measurements, Kruskal-Wallis test was calculated. A p-value < 0.05 was considered statistically significant. Subsequently, mean differences for all the variables between the affected and non-affected groups were calculated using paired sample t-tests. Comparisons between affected group and controls were calculated using independent sample t-tests. When normality was violated, comparisons were made using non-parametric tests for related and/or independent samples. Based on

Although it was not a purpose of this study, we calculated the intra-rater reliability for all the outcome measurements by using the intraclass correlation coefficient (ICC), in order to determine the minimal detectable change at 95% (MDC95), which were measured by the same assessor as previously described. For the calculation of intrarater reliability of SUR, PMI and LSI, the 3,1 model or a 2-way mixed consistency intraclass correlation coefficient (ICC) model was used. A reliability coefficient less than 0.50 was an indication of “poor” reliability; “moderate” being between 0.50 and 0.75, “good” between 0.76 and 0.90; and “excellent” over 0.90[33]. The Standard Error of Measurement (SEM), which was computed as  $SEM = SD \times (\text{square root of } (1-ICC))$ , and the MDC95 was calculated using the formula  $MDC95 = 1.96 * \sqrt{2} * SEM$ .

## RESULTS



Demographic characteristics are shown in Table 1

|                        | Patients                                                  | Healthy subjects      | p-value |
|------------------------|-----------------------------------------------------------|-----------------------|---------|
| Age (yrs; CI)          | 46.39 (43.67 to 49.11)                                    | 46.42 (44.1 to 48.67) | 0.98    |
| Women                  | 33                                                        | 33                    | 1       |
| Men                    | 21                                                        | 21                    | 1       |
| SPADI (CI)             | 56,37 (17,69 to 100)                                      | 2,66 (1,73 to 3,60)   | N/A     |
| Chronicity of symptoms | 3-6months: 18<br>6-12 months: 5<br>More than one year: 31 | N/A                   | N/A     |

Table 1: Demographic characteristics; Mean (95% CI); N/A: non-applicable

p<0.05: statistically significant; CI= confidence interval

The ICC was greater than 0.90 for all the tests, which means an excellent reliability, except for LSI (0, 87). The MDC95 was as follows: SUR45°= 0, 91; SUR90°= 1, 55; SUR135°= 2, 83; PMI= 0, 80; LSI= 1, 08.

#### *Mean values for the outcome measures and inter-rate reliability data*

Mean values of scapular upward rotation, levator scapulae and pectoralis minor index for all the groups are presented in Table 2, as well as intra-rater reliability data calculated by ICC, and MDC95.

|                         | Symptomatic<br>shoulder   | Asymptomatic<br>shoulder  | Healthy<br>subject        | ICC   | MDC95 |
|-------------------------|---------------------------|---------------------------|---------------------------|-------|-------|
| SUR (degrees)           |                           |                           |                           |       |       |
| At 45° GH<br>abduction  | 4,55 (3,79 to<br>5,32)    | 5,71 (4,82 to<br>6,60)    | 2,55 (1,81 to<br>3,29)    | > 0.9 | 0,91  |
| At 90° GH<br>abduction  | 20,75 (18,81<br>to 22,69) | 21,42 (19,88 to<br>22,96) | 16,77 (15,49<br>to 18,04) | > 0.9 | 1,55  |
| At 135° GH<br>abduction | 45,18 (42,76<br>to 47,59) | 44,16 (42,20 to<br>46,12) | 36,22 (34,34<br>to 38,09) | > 0.9 | 2,83  |
| LSI                     | 7,81 (7,42 to<br>8,20)    | 7,81 (7,53 to<br>8,30)    | 7,76 (7,42 to<br>8,11)    | 0.87  | 1,08  |
| PMI                     | 10,52 (10,27<br>to 10,76) | 10,86 (10,26 to<br>11,46) | 10,07 (9,73 to<br>10,42)  | > 0.9 | 0,80  |

Table 2: Mean values of pectoralis minor and levator scapulae index, and scapular upward rotation expressed in degrees in different groups. Abbreviations: GH = glenohumeral; SUR = scapular upward rotation; LSI = levator scapulae index; PMI = pectoralis minor index; ICC= intraclass correlation coefficient; MDC95= minimal detectable change

*Differences in SUR, PMI and LSI between groups*

The mean differences between groups regarding SUR, PMI and LSI are shown in Table 3. There were statistical significant differences between groups in SUR at 45, 90 and 135 degrees of shoulder elevation. Comparisons between groups are described in detail in Table 3. There were not statistically significant differences between groups for both PMI and LSI (see Table 3).

|                      | Symptomatic-Asymptomatic shoulder | p     | Symptomatic-Control shoulder | p       | H     | p       |
|----------------------|-----------------------------------|-------|------------------------------|---------|-------|---------|
| SUR                  |                                   |       |                              |         |       |         |
| At 45°GH abduction   | -1,15 (-2,26 to -0,04)            | 0.04* | 2,00 (0,96 to 3,05)          | <0.001* | 26,48 | < .001* |
| At 90° GH abduction  | -0,67 (-1,90 to 3,94)             | 0.56  | 3,98 (1,68 to 6,27)          | 0.001*  | 18,48 | < .001* |
| At 135° GH abduction | 1,02 (-1,90 to 3,94)              | 0.70  | 8,96 (5,94 to 11,98)         | <0.001* | 35,04 | < .001* |
| PMI                  | -0,34% (-0,97 to 0,29%)           | 0.28  | 0,44% (0,04 to 0,85%)        | 0.03    | 3,37  | 0.18    |
| LSI                  | 0,00% (-0,35 to 0,35%)            | 0.99  | 0,05% (-0,49 to 0,58%)       | 0.86    | 0,11  | 0.95    |

1  
2  
3 Table 3: Between-group mean differences

4 \*: statistically significant ( $p < .025$ )

5  
6  
7 H: Kruskal-Wallis test

8  
9  
10  
11 **DISCUSSION**

12  
13 This study aimed to explore potential differences in scapular positioning and scapular  
14 pattern of movement between the symptomatic shoulder in patients with chronic SAPS,  
15 compared with the contralateral asymptomatic, and control shoulders. We found  
16 statistical significant differences between the three groups in SUR at 45, 90 and 135  
17 degrees of shoulder elevation. Specifically, a decreased SUR in symptomatic shoulder  
18 compared to contralateral asymptomatic shoulder at 45 degrees, was achieved. When  
19 comparing symptomatic and control participants, an increased SUR at all positions (45,  
20 90 and 135 degrees) was found in the symptomatic shoulders. Regarding PMI and LSI,  
21 there were not significant differences between all the groups.  
22  
23  
24  
25  
26  
27  
28  
29  
30  
31  
32

33 This is the first study that compares SUR, PMI and LSI between both symptomatic and  
34 asymptomatic shoulders in patients with SAPS, and the symptomatic shoulder from  
35 patients with control subjects, using accessible and low-cost tools. Previous studies have  
36 reported differences in SUR during arm elevation between the symptomatic and the  
37 asymptomatic shoulder [34][20][19], showing a decreased SUR in the symptomatic  
38 shoulders, mainly within the first degrees of elevation in the scapular plane. This is in  
39 line with the present study. Furthermore, a significantly increased SUR in the  
40 symptomatic shoulder of patients when compared with control subjects was obtained.  
41  
42 These differences did surpass the MDC95 of all the positions (45, 90 and 135 degrees of  
43 shoulder elevation). This is not supported by current literature, which suggests the  
44 presence of a decreased SUR in shoulders with subacromial symptoms compared with  
45  
46  
47  
48  
49  
50  
51  
52  
53  
54  
55  
56  
57  
58  
59  
60

1  
2  
3 healthy controls[35][34][19]. This can be explained by the fact that patients that were  
4 included in our study showed long duration of shoulder pain, meaning chronicity of  
5 symptoms. In this context, the firing pattern of scapular muscle units can change,  
6  
7 generating an early SUR in an attempt to avoid pain, as has been found in a recent  
8 study[36] . It can be hypothesized that early stages of SAPS could present a deficit in  
9 SUR while more advanced stages can develop a compensatory increased SUR. As this  
10 was not measured in this study, further investigation is needed. In others shoulder  
11 conditions, current research analysing SUR in both symptomatic and pain-free  
12 shoulders does not sustain strong conclusions. Kijima et al.[37] showed absence of  
13 differences in SUR, measured by a 3-dimesional scapular kinematic analysis, between  
14 symptomatic, asymptomatic rotator cuff tears and healthy shoulders. Furthermore, Hung  
15 et al.[38] reported no differences in SUR, measured by 3-dimensional analysis, between  
16 patients with glenohumeral instability and healthy controls.  
17  
18  
19  
20  
21  
22  
23  
24  
25  
26  
27  
28  
29  
30  
31  
32

33 With regard to the pectoralis minor length, there was an absence of statistically  
34 significant difference between the symptomatic and the asymptomatic shoulders,  
35 whereas a longer pectoralis minor was found in symptomatic shoulder patient when  
36 compared to control shoulders, but differences were smaller than the MDC95 (0,80).  
37 This finding was contrary to what was expected, since a more anterior tilted positioning  
38 of the scapula is thought to be correlated with a potential risk of SAPS. Our results are  
39 in line with those obtained by Struyf et al.[14] The aforementioned study showed PMI  
40 values of 9.17 (0.54) in the dominant side in the control group, 9.66 (0.68) in the  
41 symptomatic side and 9.64 (0.72) in the asymptomatic side in the patient group, but they  
42 did not study the statistical differences between groups. On the other hand, Lewis et al.  
43 [15]also reported values that analysed pectoral minor length, but comparisons with the  
44  
45  
46  
47  
48  
49  
50  
51  
52  
53  
54  
55  
56  
57  
58  
59  
60

1  
2  
3 present study are not possible as the test used was different (acromion-table distance  
4 test). To our knowledge there are no studies investigating these potential differences.

5  
6  
7 Previous studies[12] have found, in healthy subjects with a shortened pectoralis minor,  
8  
9 a similar scapular behaviour to those suffering from SIS. Likewise, pectoral minor  
10  
11 length has a weak positive correlation with the acromiohumeral distance in healthy male  
12  
13 athletes[29], which means that the pectoralis minor could have a slight influence in the  
14  
15 scapular positioning in the case of shortening. However, based on the results obtained in  
16  
17 the present study, and also on previous inconsistent evidence along this line[6][10], the  
18  
19 pectoral minor does not seem to play a key role in patients with chronic SAPS, when  
20  
21 compared to contralateral non-affected shoulders and control subjects.  
22  
23  
24  
25

26  
27 In relation to LS length, there was an absence of differences between symptomatic and  
28  
29 asymptomatic shoulder in patients, and between symptomatic shoulder and controls in  
30  
31 this study. To the best of our knowledge, this is the first study that analyses such  
32  
33 differences between subjects with shoulder symptoms and controls, so comparisons  
34  
35 with others are difficult. It is thought that a shortened LS can produce a scapula more  
36  
37 downwardly rotated[13] and, hence, a greater compromise of the subacromial space  
38  
39 during overhead movements. As we did not determine the scapular position in this  
40  
41 study, a conclusion on the absence of differences in levator scapulae length between  
42  
43 different groups cannot be made, thus further studies are needed in this field.  
44  
45  
46  
47

48  
49 Some strong points from this study need to be mentioned. First, the intra-rater reliability  
50  
51 obtained in all the measurements was excellent. Second, an exhaustive ultrasound and  
52  
53 clinical assessment to avoid the inclusion of patients with rotator cuff tears was carried  
54  
55 out. Third, the examiner who assessed all the measurements had an extensive clinical  
56  
57  
58  
59  
60

1  
2  
3 experience.

4  
5  
6  
7 On the other hand, some limitations need to be recognized. As only one examiner  
8 assessed all the outcome measures, inter-rater reliability was not calculated, so this  
9 could introduce bias. Moreover, as the minimal clinically importance difference for  
10 SUR is unknown, we cannot make a conclusion to whether the differences found in this  
11 study mean a clinical importance or not. Our results should be taken with caution when  
12 interpreted, as a sample with chronic SAPS was studied, so we do not know if these  
13 results can be extrapolated to other populations, e.g. acute shoulder pain. Lastly,  
14 including healthy controls by using a SPADI score below 15 points could mean bias.  
15  
16  
17  
18  
19  
20  
21  
22  
23  
24  
25

26 The present results could have clinical implications, and contribute to increase the body  
27 of knowledge in the field of scapular biomechanics tests. First, it seems that pectoral  
28 minor and/or levator scapulae are not distinguishing factors when comparing the  
29 symptomatic and the contralateral asymptomatic shoulder in subjects suffering from  
30 SAPS. Second, a difference of 1, 15 degrees of SUR between symptomatic and  
31 asymptomatic shoulder in those with chronic SAPS when comparing both at 45° of  
32 shoulder elevation may indicate shoulder dysfunction, and third, the use of the SUR test  
33 at 45°, 90° and 135° of shoulder elevation may be useful in the assessment of shoulder  
34 conditions when compared to values from control subjects.  
35  
36  
37  
38  
39  
40  
41  
42  
43  
44  
45  
46  
47

48 Further research that analyses levator scapulae length and scapular positioning, and the  
49 minimal clinically importance difference in SUR, would contribute to enhance  
50 knowledge in this field. Moreover, studies analysing changes in SUR and pectoral  
51 minor length after application of physical therapies are necessary to corroborate their  
52  
53  
54  
55  
56  
57  
58  
59  
60

1  
2  
3 contribution, as indicators of improvement, when patients with chronic SAPS are  
4  
5 treated.

6  
7  
8  
9 In conclusion, SUR is greater in patients with chronic SAPS when compared with  
10  
11 control volunteers at different angles of shoulder elevation, and is also greater regarding  
12  
13 PMI values at rest position. The usefulness of the present findings is theorized, but  
14  
15 further studies to confirm this in clinical practice are needed.  
16  
17  
18  
19  
20  
21  
22  
23  
24

#### 25 Contributor ship statement

26  
27  
28 The presented work follows the ICMJE recommends for authorship, based on the following 4  
29 criteria:

30  
31 All authors have made substantial contributions to the conception or design of the work (SNL  
32 and ALS); or the acquisition (SNL, MFS and ALS), analysis (SNL and ALS), or interpretation of  
33 data for the work (SNL, and ALS); AND

34  
35 Drafting the work or revising it critically for important intellectual content (SNL, MFS, FS, JMC  
36 and ALS); AND

37  
38 Final approval of the version to be published (SNL, MFS, FS, JMC and ALS); AND

39  
40 Agreement to be accountable for all aspects of the work in ensuring that questions related to  
41 the accuracy or integrity of any part of the work are appropriately investigated and resolved.  
42  
43

44 In addition, authors have confidence in the integrity of the contributions of their co-authors.  
45  
46  
47  
48

#### 49 Competing interests

50  
51  
52 All authors state that the founders had no role in the study and they have no conflicts of  
53  
54 interest to declare. All authors have made a substantial scientific contribution to the  
55  
56 study and they are thoroughly familiar with the primary data. All authors have read the  
57  
58  
59  
60



1  
2  
3 complete manuscript and take responsibility for the content and completeness of it and  
4 understand that if the paper, or any part of it, is found to be faulty or fraudulent, all  
5 authors share responsibility.  
6  
7  
8  
9

#### 10 Funding

11  
12 This research did not receive any specific grant from funding agencies in the public,  
13 commercial, or not-for-profit sectors.  
14  
15  
16  
17

#### 18 Data sharing statement

19  
20 The data sharing statement is currently not available due to a secondary analysis is  
21 being made. However, the available data can be obtained by contacting the  
22 corresponding author when the whole work is finished.  
23  
24  
25  
26  
27  
28  
29  
30

#### 31 REFERENCES

- 32  
33 1 Herin F, Vézina M, Thaon I, *et al.* Predictors of chronic shoulder pain after 5  
34 years in a working population. *Pain* 2012;**153**:2253–9.  
35  
36 doi:10.1016/j.pain.2012.07.024  
37  
38  
39 2 Luime J, Koes B, Hendriksen I, *et al.* Prevalence and incidence of shoulder pain  
40 in the general population; a systematic review. *Scand J Rheumatol* 2004;**33**:73–  
41 81. doi:16167509  
42  
43  
44 3 Bergman GJ, Winters JC, Groenier KH, *et al.* Manipulative Therapy in Addition  
45 to Usual Care for Patients With Shoulder Complaints: Results of Physical  
46 Examination Outcomes in a Randomized Controlled Trial. *J Manipulative*  
47  
48  
49  
50  
51  
52  
53  
54  
55 4 Roquelaure Y, Ha C, Leclerc A, *et al.* Epidemiologic surveillance of upper-  
56  
57  
58  
59  
60

- 1  
2  
3 extremity musculoskeletal disorders in the working population. *Arthritis Care*  
4 *Res* 2006;**55**:765–78. doi:10.1002/art.22222  
5  
6  
7 5 Linsell L, Dawson J, Zondervan K, *et al*. Prevalence and incidence of adults  
8 consulting for shoulder conditions in UK primary care; patterns of diagnosis and  
9 referral. *Rheumatology* 2006;**45**:215–21. doi:10.1093/rheumatology/kei139  
10  
11  
12  
13 6 Ratcliffe E, Pickering S, Mclean S, *et al*. Is there a relationship between  
14 subacromial impingement syndrome and scapular orientation? A systematic  
15 review. *Br J Sport Med* 2014;**48**:1251–6. doi:10.1136/bjsports-2013-092389  
16  
17  
18  
19  
20 7 McCreesh KM, Crotty JM, Lewis JS. Acromiohumeral distance measurement in  
21 rotator cuff tendinopathy: is there a reliable, clinically applicable method? A  
22 systematic review. *Br J Sports Med* 2013;:298–305. doi:10.1136/bjsports-2012-  
23 092063  
24  
25  
26  
27  
28 8 Diercks R, Bron C, Dorrestijn O, *et al*. Guideline for diagnosis and treatment of  
29 subacromial pain syndrome. *Acta Orthop* 2014;**85**:314–22.  
30  
31  
32  
33  
34  
35 9 van der Windt DA, Koes BW, Boeke AJ, *et al*. Shoulder disorders in general  
36 practice: prognostic indicators of outcome. *Br J Gen Pract* 1996;**46**:519–23.  
37  
38  
39  
40 10 Timmons MK, Thigpen CA, Seitz AL, *et al*. Scapular Kinematics and  
41 Subacromial-Impingement Syndrome : A Meta-Analysis. 2012;:354–70.  
42  
43  
44 11 Kibler WB, Ludewig PM, McClure PW, *et al*. Clinical implications of scapular  
45 dyskinesia in shoulder injury: the 2013 consensus statement from the ‘scapular  
46 summit’. *Br J Sports Med* 2013;**47**:877–85. doi:10.1136/bjsports-2013-092425  
47  
48  
49  
50 12 Borstad JD, Ludewig PM. The effect of long versus short pectoralis minor resting  
51 length on scapular kinematics in healthy individuals. *J Orthop Sports Phys Ther*  
52 2005;**35**:227–38. doi:10.2519/jospt.2005.35.4.227  
53  
54  
55  
56  
57  
58  
59  
60

- 1  
2  
3 13 Lee JH, Cynn HS, Choi WJ, *et al.* Reliability of levator scapulae index in  
4 subjects with and without scapular downward rotation syndrome. *Phys Ther*  
5 *Sport* 2016;**19**:1–6. doi:10.1016/j.ptsp.2015.07.002  
6  
7  
8  
9 14 Struyf F, Meeus M, Franssen E, *et al.* Interrater and intrarater reliability of the  
10 pectoralis minor muscle length measurement in subjects with and without  
11 shoulder impingement symptoms. *Man Ther* 2014;:1–5.  
12  
13 doi:10.1016/j.math.2014.04.005  
14  
15  
16 15 Lewis JS, Valentine RE. The pectoralis minor length test : a study of the intra-  
17 rater reliability symptoms. *BMC Musculoskelet Disord* 2007;**10**:1–10.  
18  
19 doi:10.1186/1471-2474-8-64  
20  
21  
22 16 Rosa DP, Borstad JD, Pires ED, *et al.* Reliability of measuring pectoralis minor  
23 muscle resting length in subjects with and without signs of shoulder  
24 impingement. *Brazilian J Phys Ther* 2016;**20**:176–83. doi:10.1590/bjpt-  
25  
26 rbf.2014.0146  
27  
28  
29 17 Rosa DP, Santos R V., Gava V, *et al.* Shoulder external rotation range of motion  
30 and pectoralis minor length in individuals with and without shoulder pain.  
31  
32 *Physiother Theory Pract* 2018;**16**:1–9. doi:10.1080/09593985.2018.1459985  
33  
34  
35 18 Rosa DP, Borstad JD, Pogetti LS, *et al.* Effects of a stretching protocol for the  
36 pectoralis minor on muscle length , function , and scapular kinematics in  
37 individuals with and without shoulder pain. *J Hand Ther* 2016;:1–9.  
38  
39  
40 19 Struyf F, Nijs J, Baeyens JP, *et al.* Scapular positioning and movement in  
41 unimpaired shoulders, shoulder impingement syndrome, and glenohumeral  
42 instability. *Scand J Med Sci Sport* 2011;**21**:352–8. doi:10.1111/j.1600-  
43  
44 0838.2010.01274.x  
45  
46  
47 20 Ellenbecker TS, Cools A. Rehabilitation of shoulder impingement syndrome and  
48  
49  
50  
51  
52  
53  
54  
55  
56  
57  
58  
59  
60

- 1  
2  
3 rotator cuff injuries: an evidence-based review. *Br J Sports Med* 2010;**44**:319–27.  
4  
5 doi:10.1136/bjism.2009.058875  
6  
7 21 Struyf F, Nijs J, Mottram S, *et al.* Clinical assessment of the scapula: a review of  
8  
9 the literature. *Br J Sports Med* 2014;**48**:883–90. doi:10.1136/bjsports-2012-  
10  
11 091059  
12  
13 22 Larsen CM, Juul-kristensen B, Lund H, *et al.* Measurement properties of existing  
14  
15 clinical assessment methods evaluating scapular positioning and function . A  
16  
17 systematic review. 2014;**3985**:453–82. doi:10.3109/09593985.2014.899414  
18  
19 23 Groef A De, Kampen M Van, Vervloesem N, *et al.* Ac ce pt us t. *Physiotherapy*  
20  
21 Published Online First: 2016. doi:10.1016/j.physio.2016.07.002  
22  
23  
24 24 Kibler W Ben, Sciascia A. Current concepts : scapular dyskinesis Current  
25  
26 concepts : scapular dyskinesis. *Sport Med* 2010;:300–5.  
27  
28 doi:10.1136/bjism.2009.058834  
29  
30 25 Cools a M, Cambier D, Witvrouw EE. Screening the athlete’s shoulder for  
31  
32 impingement symptoms: a clinical reasoning algorithm for early detection of  
33  
34 shoulder pathology. *Br J Sports Med* 2008;**42**:628–35.  
35  
36  
37 26 Wiener SN, Seitz WH. Sonography of the shoulder in patients with tears of the  
38  
39 rotator cuff: Accuracy and value for selecting surgical options. *Am J Roentgenol*  
40  
41 1993;**160**:103–7. doi:10.1177/875647939300900224  
42  
43  
44 27 Engebretsen K, Grotle M, Bautz-Holter E, Ekeberg OM BJ. Predictors of  
45  
46 shoulder pain and disability index (SPADI) and work status after 1 year in  
47  
48 patients with subacromial shoulder pain. *BMC Musculoskelet Disord*  
49  
50 2010;**11**:218.  
51  
52 28 Watson L, Balster S, Finch C, *et al.* Measurement of scapula upward rotation: a  
53  
54 reliable clinical procedure. *Br J Sports Med* 2005;**39**:599–603.  
55  
56  
57  
58  
59  
60

- 1  
2  
3 doi:10.1136/bjism.2004.013243  
4  
5 29 Tanya Mackenzie, Lee Herrington, Lenard Funk AC. Relationship between  
6  
7 extrinsic factors and acromio-humeral distance. *Man Ther* Published Online  
8  
9 First: 2016. doi:10.1016/j.math.2016.02.005  
10  
11 30 Roach KE, Budiman-Mak E, Songsiridej N, *et al.* Development of a shoulder  
12  
13 pain and disability index. *Arthritis Care Res* 1991;**4**:143–9.  
14  
15 doi:10.1002/art.1790040403  
16  
17 31 MacDermid JC, Solomon P, Prkachin K. The Shoulder Pain and Disability Index  
18  
19 demonstrates factor, construct and longitudinal validity. *BMC Musculoskelet*  
20  
21 *Disord* 2006;**7**:12. doi:10.1186/1471-2474-7-12  
22  
23 32 Membrilla-Mesa MD, Cuesta-Vargas AI, Pozuelo-Calvo R, *et al.* Shoulder pain  
24  
25 and disability index: Cross cultural validation and evaluation of psychometric  
26  
27 properties of the Spanish version. *Health Qual Life Outcomes* 2015;**13**:1–6.  
28  
29 doi:10.1186/s12955-015-0397-z  
30  
31 33 Portney LG, Watkins MP. Statistical measures of reliability. In: *Foundations of*  
32  
33 *clinical research : applications to practice*. 2000. 557–86.  
34  
35 34 Turgut E, Duzgun I, Baltaci G. Scapular asymmetry in participants with and  
36  
37 without shoulder impingement syndrome; a three-dimensional motion analysis.  
38  
39 *Clin Biomech* 2016;**39**:1–8. doi:10.1016/j.clinbiomech.2016.09.001  
40  
41 35 Ludewig PM, Cook TM. Alterations in Shoulder Kinematics and Associated  
42  
43 Muscle Activity in People With Symptoms of Shoulder Impingement Research  
44  
45 Report Alterations in Shoulder Kinematics and Associated Muscle Activity in  
46  
47 People With. *Phys Ther* 2000;**80**:276–91.  
48  
49 36 Michener LA, Sharma S, Cools AM, *et al.* Relative scapular muscle activity  
50  
51 ratios are altered in subacromial pain syndrome. *J Shoulder Elb Surg* Published  
52  
53  
54  
55  
56  
57  
58  
59  
60

1  
2  
3 Online First: 2016. doi:10.1016/j.jse.2016.04.010

4  
5 37 Kijima T, Matsuki K, Ochiai N, *et al*. In vivo 3-dimensional analysis of scapular  
6  
7 and glenohumeral kinematics : comparison of symptomatic or asymptomatic  
8  
9 shoulders with rotator cuff tears and healthy shoulders. *J Shoulder Elb Surg*  
10  
11 2015;**24**:1817–26. doi:10.1016/j.jse.2015.06.003

12  
13 38 Hung Y, Darling WG. Scapular Orientation During Planar and Three-  
14  
15 dimensional Upper Limb Movements in Individuals with Anterior Glenohumeral  
16  
17 Joint Instability. Published Online First: 2013. doi:10.1002/pri.1558  
18  
19  
20  
21  
22  
23  
24  
25

## 26 LEGENDS

27  
28 Figure 1: Scapular upward rotation measurement.

29  
30 Figure 2: Pectoral minor length measurement.

31  
32 Figure 3: Levator scapulae length measurement.  
33  
34  
35  
36  
37  
38  
39  
40  
41  
42  
43  
44  
45  
46  
47  
48  
49  
50  
51  
52  
53  
54  
55  
56  
57  
58  
59  
60

1  
2  
3  
4  
5  
6  
7  
8  
9  
10  
11  
12  
13  
14  
15  
16  
17  
18  
19  
20  
21  
22  
23  
24  
25  
26  
27  
28  
29  
30  
31  
32  
33  
34  
35  
36  
37  
38  
39  
40  
41  
42  
43  
44  
45  
46  
47  
48  
49  
50  
51  
52  
53  
54  
55  
56  
57  
58  
59  
60

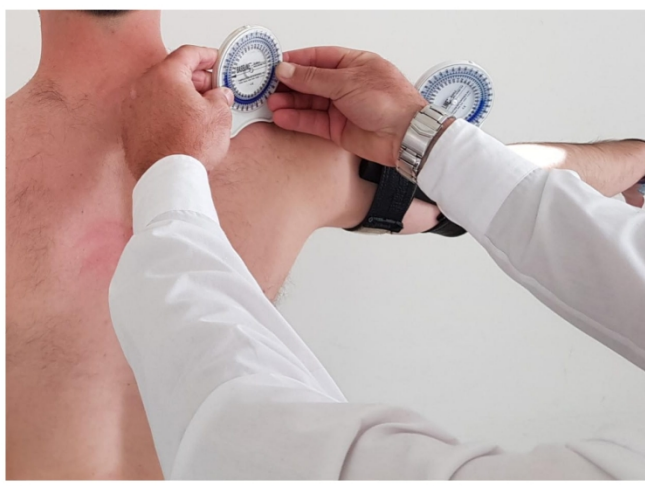

583x825mm (72 x 72 DPI)

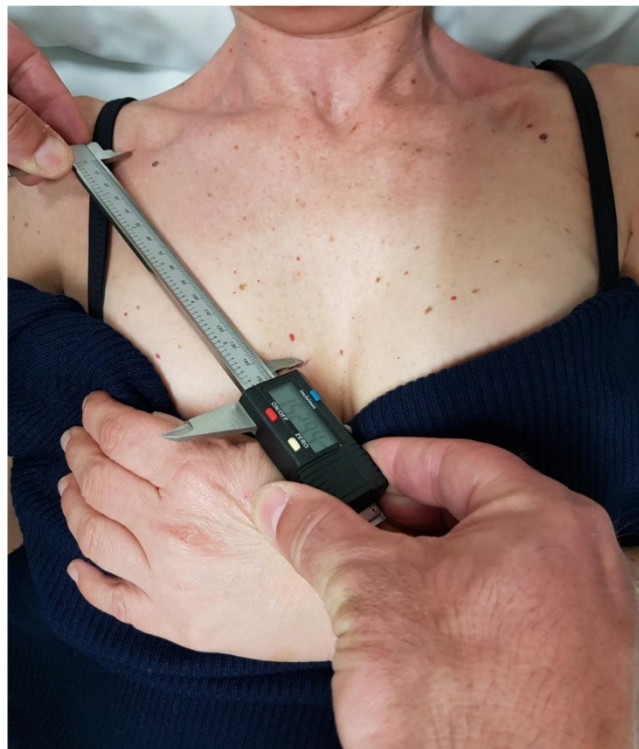

583x825mm (72 x 72 DPI)



1  
2  
3  
4  
5  
6  
7  
8  
9  
10  
11  
12  
13  
14  
15  
16  
17  
18  
19  
20  
21  
22  
23  
24  
25  
26  
27  
28  
29  
30  
31  
32  
33  
34  
35  
36  
37  
38  
39  
40  
41  
42  
43  
44  
45  
46  
47  
48  
49  
50  
51  
52  
53  
54  
55  
56  
57  
58  
59  
60

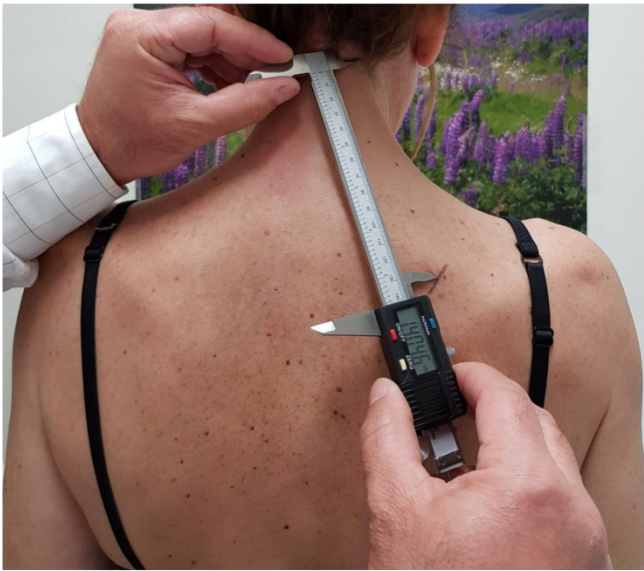

583x825mm (72 x 72 DPI)

## STROBE Statement—checklist of items that should be included in reports of observational studies

|                              | Item No | Recommendation                                                                                                                                                                                                                                                                                                                                                                                                                                                                                                                                                                                                                                                                                                 |
|------------------------------|---------|----------------------------------------------------------------------------------------------------------------------------------------------------------------------------------------------------------------------------------------------------------------------------------------------------------------------------------------------------------------------------------------------------------------------------------------------------------------------------------------------------------------------------------------------------------------------------------------------------------------------------------------------------------------------------------------------------------------|
| <b>Title and abstract</b>    | 1       | (a) Indicate the study's design with a commonly used term in the title or the abstract<br>(b) Provide in the abstract an informative and balanced summary of what was done and what was found <b>PAGE 1</b>                                                                                                                                                                                                                                                                                                                                                                                                                                                                                                    |
| <b>Introduction</b>          |         |                                                                                                                                                                                                                                                                                                                                                                                                                                                                                                                                                                                                                                                                                                                |
| Background/rationale         | 2       | Explain the scientific background and rationale for the investigation being reported <b>PAGE 3</b>                                                                                                                                                                                                                                                                                                                                                                                                                                                                                                                                                                                                             |
| Objectives                   | 3       | State specific objectives, including any prespecified hypotheses <b>PAGE 4</b>                                                                                                                                                                                                                                                                                                                                                                                                                                                                                                                                                                                                                                 |
| <b>Methods</b>               |         |                                                                                                                                                                                                                                                                                                                                                                                                                                                                                                                                                                                                                                                                                                                |
| Study design                 | 4       | Present key elements of study design early in the paper <b>PAGE 4</b>                                                                                                                                                                                                                                                                                                                                                                                                                                                                                                                                                                                                                                          |
| Setting                      | 5       | Describe the setting, locations, and relevant dates, including periods of recruitment, exposure, follow-up, and data collection <b>PAGE 4</b>                                                                                                                                                                                                                                                                                                                                                                                                                                                                                                                                                                  |
| Participants                 | 6       | (a) <i>Cohort study</i> —Give the eligibility criteria, and the sources and methods of selection of participants. Describe methods of follow-up<br><i>Case-control study</i> —Give the eligibility criteria, and the sources and methods of case ascertainment and control selection. Give the rationale for the choice of cases and controls<br><i>Cross-sectional study</i> —Give the eligibility criteria, and the sources and methods of selection of participants<br>(b) <i>Cohort study</i> —For matched studies, give matching criteria and number of exposed and unexposed<br><i>Case-control study</i> —For matched studies, give matching criteria and the number of controls per case <b>PAGE 5</b> |
| Variables                    | 7       | Clearly define all outcomes, exposures, predictors, potential confounders, and effect modifiers. Give diagnostic criteria, if applicable <b>PAGE 6-7-8</b>                                                                                                                                                                                                                                                                                                                                                                                                                                                                                                                                                     |
| Data sources/<br>measurement | 8*      | For each variable of interest, give sources of data and details of methods of assessment (measurement). Describe comparability of assessment methods if there is more than one group <b>PAGE 6-7-8</b>                                                                                                                                                                                                                                                                                                                                                                                                                                                                                                         |
| Bias                         | 9       | Describe any efforts to address potential sources of bias <b>PAGE 8</b>                                                                                                                                                                                                                                                                                                                                                                                                                                                                                                                                                                                                                                        |
| Study size                   | 10      | Explain how the study size was arrived at <b>PAGE 9</b>                                                                                                                                                                                                                                                                                                                                                                                                                                                                                                                                                                                                                                                        |
| Quantitative variables       | 11      | Explain how quantitative variables were handled in the analyses. If applicable, describe which groupings were chosen and why <b>PAGE 9</b>                                                                                                                                                                                                                                                                                                                                                                                                                                                                                                                                                                     |
| Statistical methods          | 12      | (a) Describe all statistical methods, including those used to control for confounding<br>(b) Describe any methods used to examine subgroups and interactions <b>PAGE 9</b><br>(c) Explain how missing data were addressed<br>(d) <i>Cohort study</i> —If applicable, explain how loss to follow-up was addressed<br><i>Case-control study</i> —If applicable, explain how matching of cases and controls was addressed<br><i>Cross-sectional study</i> —If applicable, describe analytical methods taking account of sampling strategy<br>(e) Describe any sensitivity analyses                                                                                                                                |

Continued on next page

**Results**

|                  |     |                                                                                                                                                                                                                                                                                                                                                                                                                                 |
|------------------|-----|---------------------------------------------------------------------------------------------------------------------------------------------------------------------------------------------------------------------------------------------------------------------------------------------------------------------------------------------------------------------------------------------------------------------------------|
| Participants     | 13* | (a) Report numbers of individuals at each stage of study—eg numbers potentially eligible, examined for eligibility, confirmed eligible, included in the study, completing follow-up, and analysed <b>PAGE 9-12</b><br>(b) Give reasons for non-participation at each stage<br>(c) Consider use of a flow diagram                                                                                                                |
| Descriptive data | 14* | (a) Give characteristics of study participants (eg demographic, clinical, social) and information on exposures and potential confounders <b>PAGE 10</b><br>(b) Indicate number of participants with missing data for each variable of interest<br>(c) <i>Cohort study</i> —Summarise follow-up time (eg, average and total amount)                                                                                              |
| Outcome data     | 15* | <i>Cohort study</i> —Report numbers of outcome events or summary measures over time<br><i>Case-control study</i> —Report numbers in each exposure category, or summary measures of exposure <b>PAGE 9-12</b><br><i>Cross-sectional study</i> —Report numbers of outcome events or summary measures                                                                                                                              |
| Main results     | 16  | (a) Give unadjusted estimates and, if applicable, confounder-adjusted estimates and their precision (eg, 95% confidence interval). Make clear which confounders were adjusted for and why they were included <b>PAGE 11-12</b><br>(b) Report category boundaries when continuous variables were categorized<br>(c) If relevant, consider translating estimates of relative risk into absolute risk for a meaningful time period |
| Other analyses   | 17  | Report other analyses done—eg analyses of subgroups and interactions, and sensitivity analyses                                                                                                                                                                                                                                                                                                                                  |

**Discussion**

|                  |    |                                                                                                                                                                                              |
|------------------|----|----------------------------------------------------------------------------------------------------------------------------------------------------------------------------------------------|
| Key results      | 18 | Summarise key results with reference to study objectives <b>PAGE 12</b>                                                                                                                      |
| Limitations      | 19 | Discuss limitations of the study, taking into account sources of potential bias or imprecision. Discuss both direction and magnitude of any potential bias <b>PAGE 15</b>                    |
| Interpretation   | 20 | Give a cautious overall interpretation of results considering objectives, limitations, multiplicity of analyses, results from similar studies, and other relevant evidence <b>PAGE 12-14</b> |
| Generalisability | 21 | Discuss the generalisability (external validity) of the study results <b>PAGE 15-16</b>                                                                                                      |

**Other information**

|         |    |                                                                                                                                                                                     |
|---------|----|-------------------------------------------------------------------------------------------------------------------------------------------------------------------------------------|
| Funding | 22 | Give the source of funding and the role of the funders for the present study and, if applicable, for the original study on which the present article is based <b>NON APPLICABLE</b> |
|---------|----|-------------------------------------------------------------------------------------------------------------------------------------------------------------------------------------|

\*Give information separately for cases and controls in case-control studies and, if applicable, for exposed and unexposed groups in cohort and cross-sectional studies.

**Note:** An Explanation and Elaboration article discusses each checklist item and gives methodological background and published examples of transparent reporting. The STROBE checklist is best used in conjunction with this article (freely available on the Web sites of PLoS Medicine at <http://www.plosmedicine.org/>, Annals of Internal Medicine at <http://www.annals.org/>, and Epidemiology at <http://www.epidem.com/>). Information on the STROBE Initiative is available at [www.strobe-statement.org](http://www.strobe-statement.org).

# BMJ Open

**Differences in scapular upward rotation, pectoralis minor and levator scapulae muscle length between the symptomatic, the contralateral asymptomatic shoulder and control subjects: A cross-sectional study in a Spanish primary care setting.**

|                                 |                                                                                                                                                                                                                                                                                                                                                                                                                   |
|---------------------------------|-------------------------------------------------------------------------------------------------------------------------------------------------------------------------------------------------------------------------------------------------------------------------------------------------------------------------------------------------------------------------------------------------------------------|
| Journal:                        | <i>BMJ Open</i>                                                                                                                                                                                                                                                                                                                                                                                                   |
| Manuscript ID                   | bmjopen-2018-023020.R2                                                                                                                                                                                                                                                                                                                                                                                            |
| Article Type:                   | Research                                                                                                                                                                                                                                                                                                                                                                                                          |
| Date Submitted by the Author:   | 02-Jan-2019                                                                                                                                                                                                                                                                                                                                                                                                       |
| Complete List of Authors:       | Navarro-Ledesma, Santiago; University of Granada, Physiotherapy<br>Fernandez-Sanchez, Manuel; Universidad De Almeria Facultad de Ciencias de la Educacion Enfermeria y Fisioterapia<br>STRUYF, FILIP; Universiteit Antwerpen Campus Drie Eiken, REHABILITATION SCIENCES<br>Martinez-Calderon, Javier<br>Miguel Morales-Asencio, Jose; Univ Malaga<br>LUQUE-SUAREZ, ALEJANDRO; UNIVERSITY OF MALAGA, PHYSIOTHERAPY |
| <b>Primary Subject Heading</b>: | Rehabilitation medicine                                                                                                                                                                                                                                                                                                                                                                                           |
| Secondary Subject Heading:      | Sports and exercise medicine                                                                                                                                                                                                                                                                                                                                                                                      |
| Keywords:                       | scapular kinematic, shoulder pain, chronic pain                                                                                                                                                                                                                                                                                                                                                                   |
|                                 |                                                                                                                                                                                                                                                                                                                                                                                                                   |

SCHOLARONE™  
Manuscripts

1  
2  
3 **Differences in scapular upward rotation, pectoralis minor and levator scapulae**  
4 **muscle length between the symptomatic, the contralateral asymptomatic shoulder**  
5 **and control subjects: A cross-sectional study in a Spanish primary care setting.**  
6  
7  
8

9  
10  
11 Navarro-Ledesma S\*; Fernandez-Sanchez M; Struyf F; Martinez-Calderon J; Morales-  
12 Asencio JM; Luque-Suarez A  
13  
14

15  
16 Corresponding author:  
17

18 Santiago Navarro-Ledesma (snl@ugr.es)  
19

20 Querol street, 5, 52004, Melilla, Spain  
21

22  
23  
24 00 34 951 952 853  
25

26  
27  
28 Santiago Navarro-Ledesma  
29

30 Department of Physiotherapy, University of Granada, Melilla, Spain  
31

32  
33  
34  
35 Manuel Fernandez-Sanchez  
36

37 Department of Nursing, Physiotherapy and Medicine, University of Almeria, Spain  
38

39  
40  
41  
42 Filip Struyf  
43

44 Department of Rehabilitation Sciences and Physiotherapy, University of Antwerp,  
45  
46 Antwerpen, Belgium  
47  
48

49  
50  
51 Javier Martinez-Calderon  
52

53 Department of Physiotherapy, University of Malaga, Spain  
54  
55

56  
57  
58 Jose M Morales Asencio  
59  
60

1  
2  
3 Department of Nursing, University of Malaga, Spain  
4

5 Instituto de la Investigacion Biomedica de Malaga-IBIMA  
6  
7  
8

9  
10 Alejandro Luque-Suarez  
11

12 Department of Physiotherapy, University of Malaga, Spain  
13

14 Instituto de la Investigacion Biomedica de Malaga-IBIMA  
15  
16  
17

18  
19 Keywords: scapular kinematic; shoulder pain; chronic pain  
20  
21

22 Word count: 3163  
23  
24  
25  
26  
27  
28  
29  
30  
31  
32  
33  
34  
35  
36  
37  
38  
39  
40  
41  
42  
43  
44  
45  
46  
47  
48  
49  
50  
51  
52  
53  
54  
55  
56  
57  
58  
59  
60

## ABSTRACT

Objective: To determine the potential differences in both scapular positioning and scapular movement between the symptomatic and asymptomatic contralateral shoulder, in patients with unilateral subacromial pain syndrome (SAPS), and when compared to participants free of shoulder pain.

Setting: Three different primary care centres.

Participants: A sample of seventy-three patients with SAPS in their dominant arm was recruited, with a final sample size of fifty-four participants.

Primary outcome measures: the scapular upward rotation (SUR), the pectoralis minor and the levator scapulae muscles length tests were carried out.

Results: When symptomatic shoulders and controls were compared, an increased SUR at all positions (45, 90 and 135 degrees) was obtained in symptomatic shoulders (2/3,98/ 8,96 degrees respectively). These differences in SUR surpassed the minimal detectable change (MDC95) (0,91/1,55/2,83 degrees at 45/90/135 degrees of shoulder elevation). No differences were found in SUR between symptomatic and contralateral shoulders. No differences were found in either pectoralis minor or levator scapulae muscle length in all groups.

Conclusions: scapular upward rotation was greater in patients with chronic SAPS compared to controls at different angles of shoulder elevation.

Keywords: scapular kinematic; shoulder pain; chronic pain

### **Strengths and limitations of this study**

An exhaustive ultrasound and clinical assessment was carried out to avoid the inclusion of patients with rotator cuff tears.

The examiner who assessed all the measurements was an experience clinical professional.

The inter-rater reliability was not calculated, so this could introduce bias.

The minimal clinically important difference for SUR is unknown, thus we cannot make a conclusion as to whether the differences found in this study reached clinical importance or not.



## INTRODUCTION

Shoulder pain is the most common musculoskeletal condition after neck pain and low back pain[1]. Shoulder pain point prevalence figures range from 6.9 to 26%, from 18.6 to 31% for 1-month prevalence, from 4.7 to 46.7% for 1-year prevalence, and from 6.7 to 66.7% for lifetime prevalence[2]. Furthermore, shoulder pain prevalence is even higher in women[3], in the working population[4], and increases with age[5].

Subacromial pain syndrome (SAPS) is the most common cause of shoulder pain[6,7]. It is defined as a non-traumatic, usually unilateral, shoulder disorder that causes localized pain around the acromion, often worsening during or subsequent lifting the arm[8]. The best therapeutic approach in SAPS is still under debate. Half of the patients with shoulder pain being attended in primary care do not completely recover after 6 months from their initial episode[9]. Thus, there is a need to explore different non-invasive strategies in these patients. One of the approaches that can be beneficial for the patient is to focus on the scapulothoracic joint. To date, there is inconsistent evidence to support a relationship between SAPS symptoms and scapular orientation[10][6]. The most common causative mechanism of an altered scapular positioning involves the soft tissue, such as inflexibility (tightness) and alterations in the periscapular muscles[11]. Specifically, both a decreased activation and strength of the serratus anterior, as well as alterations in upper/lower trapezius couple forces, can alter scapular upward rotation and posterior tilt [11]. Likewise, pectoralis minor, levator scapulae muscles[12,13] and biceps short head[11] have been traditionally assessed as their shortening may potentially influence scapular positioning.

Previous studies have reported normative values on pectoralis minor length in the dominant and non-dominant side in both symptomatic and control populations, by using the pectoralis minor index (PMI)[14] and the acromion-table distance test[15]. Recently,

1  
2  
3 pectoralis minor length and its shortening have received remarkable empirical attention,  
4  
5 in terms of studies of its reliability [16], its association with shoulder external  
6  
7 rotation[17], and as an outcome measure after a stretching program in participants with  
8  
9 shoulder pain[18]. However, differences between symptomatic groups and healthy  
10  
11 controls were not calculated. To the best of our knowledge, differences in the levator  
12  
13 scapulae index (LSI) between symptomatic and control populations have not been  
14  
15 determined yet. With regard to patterns of movement, there is conflicting evidence.  
16  
17 While some studies have shown association between a reduced scapular upward rotation  
18  
19 (SUR) and scapular posterior tilt in SAPS [19,20], others attained inconclusive  
20  
21 findings[6,10].  
22  
23  
24

25  
26 Advanced equipment exists to assess scapular positioning and kinematics. However,  
27  
28 most of them are very technical and highly expensive, which makes them almost  
29  
30 unattainable in the clinical practice[21]. In this regard, research states that the SUR  
31  
32 seems suitably evidence-based for clinical use, while pectoralis minor length  
33  
34 measurements should be used as supplementary clinical assessment methods in addition  
35  
36 to others[22,23]. Additionally, the levator scapulae muscle length measurement has been  
37  
38 shown to be a reliable tool, and it has been proposed as part of the scapula assessment  
39  
40 because the levator scapulae directly attaches in the superior angle of the scapula[13]  
41  
42 and thus it is another possible cause of scapular dysfunction[24].  
43  
44  
45

46  
47 Specifically, there is a lack of evidence on the potential differences in PMI, LSI and  
48  
49 SUR, between painful and contralateral non-painful shoulders, and control subjects. The  
50  
51 existence of differences in scapular positioning and pattern of movement could  
52  
53 contribute to steer physiotherapy treatments towards a scapular focused treatment  
54  
55 approach.  
56  
57  
58  
59  
60

Hence, the aim of this study was to analyse the differences in scapular positioning and pattern of movement, between the symptomatic and asymptomatic shoulder, in patients with unilateral chronic SAPS, and in controls, using three different tests: i) scapular upward rotation, ii) pectoralis minor muscle length and, iii) levator scapulae muscle length. The null hypothesis ( $H_0$ ) was that there are no differences in the groups in these three different tests. The alternative hypothesis ( $H_a$ ) was that there is an increased SUR in painful shoulder when comparing with contralateral and control shoulder, as well as a decreased both pectoralis minor and levator scapulae length in painful shoulder.

## METHOD

### Study design

This was a cross-sectional, observational study, carried out in accordance with the Declaration of Helsinki. Ethical approval was obtained from the Ethics Committee of the Health Care District where the primary care centres were located (PI9/012014). The study has been reported following the recommendations of the STROBE statement for observational studies. All the participants signed an informed consent.

### Participants

A sample of seventy-three patients with chronic SAPS in their dominant arm was recruited from three different primary care centres, with a final sample size of fifty-four participants obtained after applying the inclusion criteria. General practitioners (GPs) recruited the participants who were screened for eligibility by a research assistant. Participants had to meet the following inclusion criteria: (i) men or women aged between 18 to 55 years; (ii) unilateral pain located in the anterior and/or lateral shoulder region[8]; (iii) 2 out of 3 positive clinical tests (Hawkins-Kennedy; Jobe; Neer)[25]; (iv) pain with normal activity  $\geq 4/10$  on a visual analogue scale; (v) shoulder

1  
2  
3 pain lasting more than three months; (vi) a history of nontraumatic onset of shoulder  
4  
5 pain. Participants were ineligible to participate in this study if any of these conditions  
6  
7 were present: (i) history of significant shoulder trauma, such as fracture or  
8  
9 ultrasonography-clinically suspected full thickness cuff tear, following the classification  
10  
11 of Wiener and Seitz, 1993[26]; (ii) recent shoulder dislocation in the past two years; (iii)  
12  
13 systemic illnesses such as rheumatoid arthritis; (iv) adhesive capsulitis; (v) shoulder  
14  
15 pain originating from the neck or if there was a neurological impairment, osteoporosis,  
16  
17 haemophilia and/or malignancies.  
18  
19

20  
21 A sample of 40 participants with both shoulders free of pain for the last year was  
22  
23 selected. They were recruited from the same three primary care centres as the  
24  
25 participants with shoulder pain. Furthermore, to participate in the study, they had to  
26  
27 present: (i) a SPADI score  $\leq 15$  points, based on the minimal clinically detectable  
28  
29 change for this tool[27]; (ii) negative results for Neer test, Hawkins-Kennedy test and  
30  
31 Jobe test; (iii) no painful arc present during flexion or abduction; (iv) no pain during  
32  
33 resisted lateral rotation and/or abduction. Asymptomatic participants were specifically  
34  
35 age and gender matched to the symptomatic group.  
36  
37  
38  
39

#### 40 41 Outcome measurements

42  
43 All measurements were taken by a physiotherapist with more than 25 years of  
44  
45 experience, including height which was necessary to calculate PMI and LSI values. This  
46  
47 physiotherapist was blinded to the fact of participants having shoulder pain or not.  
48  
49

#### 50 51 *Scapular upward rotation (SUR)*

52  
53 The measurement of SUR was performed using two Plurimeter-V gravity reference  
54  
55 inclinometers[28]. One inclinometer was Velcro taped perpendicular to the humeral  
56  
57 shaft, just above the humeral epicondyle. At resting position, the humeral inclinometer  
58  
59 was calibrated as 0 degrees. Next, the patients were instructed to perform shoulder  
60

1  
2  
3 abduction in the coronal plane with full elbow extension and 45° of external humeral  
4  
5 rotation, with the thumb abducted. The patients were asked to stop at 45°, 90° and 135°  
6  
7 degrees of humeral abduction, where the SUR was measured with a second  
8  
9 inclinometer, manually aligned along the scapular spine (Figure 1). Three measurements  
10  
11 were collected at each position and then the mean was obtained. The arm was  
12  
13 repositioned between measurements.  
14  
15

#### 16 #FIGURE 1

##### 17 *Pectoralis minor length*

18  
19 The measurement of the pectoralis minor length was carried out with the participant in  
20  
21 the supine position. A small pillow was placed under the participant's head for comfort.  
22  
23 The participant's arm was passively placed along the side of the body in the neutral  
24  
25 position resting on the table[29]. Because of the variability among subjects this  
26  
27 measurement was best normalized creating a pectoralis minor index (PMI), which was  
28  
29 calculated by dividing the resting muscle length measurement by the subject height and  
30  
31 multiplying by 100, as previously described by Borstad et al[12]. Height was measured  
32  
33 with the patient in a standing position, by using a calliper placed at the top of the head  
34  
35 and marking a point on a scale placed on the wall. The resting muscle length was  
36  
37 measured from the caudal edge of the 4<sup>th</sup> rib to the inferomedial aspect of the coracoid  
38  
39 process with a sliding calliper (Figure 2). Pectoralis minor index values less than 7.65  
40  
41 have been identified as a shortened pectoralis minor, measured in standing position[12].  
42  
43 The measurement was taken during inspiration[14].  
44  
45  
46  
47  
48  
49  
50

#### 51 #FIGURE 2

##### 52 *Levator scapulae length*

53  
54 Participants were standing with their arms relaxed at their sides. The subjects were  
55  
56 asked to look directly ahead without any craniocervical movement[13]. The instruction  
57  
58  
59  
60

1  
2  
3 was to palpate two anatomical reference points in line that represent levator scapulae  
4 length: (1) the dorsal tubercles of the transverse processes of the second cervical  
5 vertebrae and (2) the superior angle of the medial borders of the scapula. The assessor  
6 used a skin-marker pencil to mark the reference points. The marks were cleaned  
7 immediately after each test session. The distance between these two bony reference  
8 points was measured with a sliding calliper (Figure 3). By creating a LSI (levator  
9 scapulae length [cm]/subjects' height [cm]\*100), the subjects' variability in body height  
10 was normalized[13]. The LSI was expressed as a percentage of the subjects' height.  
11  
12  
13  
14  
15  
16  
17  
18  
19  
20

### 21 # FIGURE 3

22  
23 The Shoulder Pain and Disability Index (SPADI) was assessed in all participants. The  
24 SPADI is composed of 13 questions and contains two domains: pain and disability. The  
25 score of the questionnaire ranges from 0 to 100, with very high scores indicating worse  
26 function. The numeric pain scale runs from 0 to 10, with 0 indicating no pain and 10  
27 representing the worst pain[30]. The SPADI has shown a good internal consistency with  
28 a Cronbach's alpha of 0.95 for the total score, 0.92 for the pain subscale and 0.93 for the  
29 disability subscale as well as the ability to detect change over time[31]. A Spanish  
30 version of the SPADI was used since English was not the native language for all the  
31 participants[32].  
32  
33  
34  
35  
36  
37  
38  
39  
40  
41  
42  
43

### 44 Data analysis

45  
46 The Statistical Package for the Social Sciences (version 23.0 for Mac; SPSS Inc.  
47 Chicago, IL) was used to analyse the collected data. Normality for all variables was  
48 explored using the Kolmogorov Smirnov test for the group of participants with shoulder  
49 pain (affected and non-affected), and for the control subjects. Two different analysis  
50 strategies were carried out: first, to determine differences in SUR at different degrees of  
51 abduction, a repeated measures ANOVA was developed in every group. For this  
52  
53  
54  
55  
56  
57  
58  
59  
60

1  
2  
3 analysis, F statistic was adjusted in case of non-sphericity (tested by Mauchly's test),  
4  
5 with the Greenhouse-Geissner correction. Second, to determine between-groups  
6  
7 differences for all the outcome measurements, one-way ANOVA test was calculated  
8  
9 with Bonferroni and Tukey post-hoc estimations. A p-value less than 0.05 was  
10  
11 considered statistically significant.  
12  
13

14 Although it was not a purpose of this study, we calculated the intra-rater reliability for  
15  
16 all the outcome measurements by using the intraclass correlation coefficient (ICC), in  
17  
18 order to determine the minimal detectable change at 95% (MDC95), which were  
19  
20 measured by the same assessor as previously described. For the calculation of intrarater  
21  
22 reliability of SUR, PMI and LSI, the 3,1 model or a 2-way mixed consistency ICC  
23  
24 model was used. A reliability coefficient less than 0.50 was an indication of "poor"  
25  
26 reliability; "moderate" being between 0.50 and 0.75, "good" between 0.76 and 0.90; and  
27  
28 "excellent" over 0.90[33]. The Standard Error of Measurement (SEM), which was  
29  
30 computed as  $SEM = SD \times (\text{square root of } (1 - ICC))$ , and the MDC95 was calculated  
31  
32 using the formula  $MDC95 = 1.96 * \sqrt{2} * SEM$ .  
33  
34  
35  
36

### 37 Patient and Public Involvement

38  
39 The participation of all subjects was voluntary, and no incentives were given to  
40  
41 encourage enrollment. Patients with shoulder pain from each primary care center were  
42  
43 not involved neither in the design of the study nor in the recruitment of the  
44  
45 participants. The results of the present study were sent by e-mail to those participants  
46  
47 who wanted to be informed.  
48  
49

## 50 **RESULTS**

### 51 *Sample characteristics*

52  
53 Demographic characteristics are shown in Table 1. There were not significant  
54  
55 differences between groups in terms of gender and age.  
56  
57  
58  
59  
60

|                        | Patients (mean and SD)                                    | Healthy subjects (mean and SD) |
|------------------------|-----------------------------------------------------------|--------------------------------|
| Age (yrs; CI)          | 46.39 (9.96)                                              | 46.42 (7.02)                   |
| Women                  | 33 (61.1%)                                                | 23 (57.5 %)                    |
| Men                    | 21 (38.9%)                                                | 17 (42.5 %)                    |
| SPADI (CI)             | 56.37 (20.01)                                             | 2.66 (2.88)                    |
| Chronicity of symptoms | 3-6months: 18<br>6-12 months: 5<br>More than one year: 31 | N/A                            |

Table 1: Demographic characteristics; Mean (95% CI); N/A: non-applicable;

CI= confidence interval; SPADI: shoulder pain and disability index

*Mean values for the outcome measures and intra-rater reliability data*

Mean values of scapular upward rotation (expressed in degrees), levator scapulae index (LSI) and pectoralis minor index (PMI) for all the groups are presented in Table 2. There were statistically significant differences in SUR when comparing the three groups, while no differences were found for the rest of the outcome measurements (LSI and PMI) (see Table 2). Furthermore, there was an increase in SUR from 45 to 90 and 135 degrees of shoulder abduction for all the groups, analysed by repeated measures ANOVA, with the following results:



Symptomatic shoulder:  $F(1.51, 80.05) = 1009.22$ ;  $p < 0.001$

Asymptomatic shoulder:  $F(1.46, 77.37) = 1356.57$ ;  $p < 0.001$

Healthy controls:  $F(1.46, 56.89) = 1196.18$ ;  $p < 0.001$

|                         | <b>Symptomatic<br/>shoulder</b> | <b>Asymptomatic<br/>shoulder</b> | <b>Healthy controls</b>   | <b>F</b>         | <b>p</b>   |
|-------------------------|---------------------------------|----------------------------------|---------------------------|------------------|------------|
| <b>SUR</b>              |                                 |                                  |                           |                  |            |
| 45° of GH<br>abduction  | 4.55<br>(3.79 to 5.32)          | 5.71<br>(4.82 to 6.60)           | 2.55<br>(1.81 to 3.29)    | $F(2,145)=14.14$ | $<0.001^*$ |
| 90° of GH<br>abduction  | 20.75<br>(18.81 to 22.69)       | 21.42<br>(19.88 to 22.96)        | 16.77<br>(15.49 to 18.04) | $F(2,145)=8.08$  | $<0.001^*$ |
| 135° of GH<br>abduction | 45.18<br>(42.76 to 47.59)       | 44.16<br>(42.20 to 46.12)        | 36.22<br>(34.34 to 38.09) | $F(2,145)=18.64$ | $<0.001^*$ |
| <b>LSI</b>              |                                 |                                  |                           |                  |            |
|                         | 7.81<br>(7.42 to 8.20)          | 7.81<br>(7.53 to 8.30)           | 7.76<br>(7.42 to 8.11)    | $F(2,145)=0.02$  | 0.978      |
| <b>PMI</b>              |                                 |                                  |                           |                  |            |
|                         | 10.52<br>(10.27 to 10.76)       | 10.86<br>(10.26 to 11.46)        | 10.07<br>(9.73 to 10.42)  | $F(2,145)=2.97$  | 0.054      |

Table 2: Mean values (95%CI: confidence interval) of pectoralis minor index (PMI), levator scapulae index (LSI), and scapular upward rotation expressed in degrees (SUR) in different groups; F: One-factor ANOVA for differences in symptomatic, asymptomatic and healthy controls.

\*: statistically significant.

The ICC was greater than 0.90 for all the tests, which means an excellent reliability, except for LSI (0.87). The MDC95 was as follows: SUR45°= 0.91; SUR90°= 1.55; SUR135°= 2.83; PMI= 0.80; LSI= 1.08.

### *Differences in SUR, PMI and LSI between groups*

Comparisons between groups are described in detail in Table 3. There were statistical significant differences in SUR between symptomatic and control groups at 45, 90 and 135 degrees of shoulder elevation, while no differences between symptomatic and asymptomatic group were found. There were not statistically significant differences between groups for both PMI and LSI (see Table 3).

|                         | Symptomatic vs<br>Asymptomatic<br>shoulder<br>differences<br>(95%CI) | p    | Symptomatic vs<br>Control shoulder<br>differences<br>(95%CI) | p       |
|-------------------------|----------------------------------------------------------------------|------|--------------------------------------------------------------|---------|
| SUR                     |                                                                      |      |                                                              |         |
| At 45° GH<br>abduction  | -1,15<br>(-2,46 to -0,15)                                            | 0.09 | 2,01<br>(0,59 to 3,42)                                       | 0.003*  |
| At 90° GH<br>abduction  | -0,67<br>(-3,35 to 2)                                                | 0.82 | 3,98<br>(1,08 to 6,88)                                       | 0.004*  |
| At 135° GH<br>abduction | 1,02<br>(-2,41 to 4,45)                                              | 0.76 | 8,96<br>(5,24 to 12,6)                                       | <0.001* |
| PMI                     | -0,34<br>(-1,04 to 0,36)                                             | 0.49 | 0,45<br>(-0,32 to 1,21)                                      | 0.351   |
| LSI                     | 0,00<br>(-0,55 to 0,55)                                              | 1    | 0.05<br>(-0,55 to 0,64)                                      | 0.98    |

1  
2  
3 Table 3: Between-group differences (Bonferroni and Tukey multiple comparisons)

4  
5 CI: confidence interval; SUR: scapular upward rotation; GH: glenohumeral; PMI:  
6  
7 pectoralis minor index; LSI: levator scapulae index

8  
9  
10 \*: statistically significant ( $p < 0.05$ )

## 11 12 **DISCUSSION**

13  
14 This study aimed to explore potential differences in scapular positioning and scapular  
15 pattern of movement between the symptomatic shoulder in patients with chronic SAPS,  
16 compared to the contralateral asymptomatic, and control shoulders. We found statistical  
17 significant differences in the three groups in SUR at 45, 90 and 135 degrees of shoulder  
18 elevation. Specifically, an increased SUR at all positions (45, 90 and 135 degrees) was  
19 found in favour of the symptomatic shoulders when symptomatic and control  
20 participants were compared. No differences were found between symptomatic and  
21 asymptomatic groups. Hence, our hypothesis was only partially confirmed. Regarding  
22 PMI and LSI, there were no significant differences in the groups, thus, our hypothesis  
23 was not confirmed.  
24  
25  
26  
27  
28  
29  
30  
31  
32  
33  
34  
35  
36

37 This is the first study that compares SUR, PMI and LSI between both symptomatic and  
38 asymptomatic shoulders in patients with SAPS, and between symptomatic shoulder with  
39 control subjects, using accessible and low-cost tools. Previous studies have reported  
40 differences in SUR during arm elevation between the symptomatic and the  
41 asymptomatic shoulder[19,20,34], showing a decreased SUR in the symptomatic  
42 shoulders, mainly within the first degrees of elevation in the scapular plane. We found a  
43 significantly increased SUR in the symptomatic shoulder of patients when compared  
44 with control subjects. These differences surpassed the MDC95 in all the positions (45,  
45 90 and 135 degrees of shoulder elevation). This is not supported by current literature,  
46 which suggests the presence of a decreased SUR in shoulders with subacromial  
47  
48  
49  
50  
51  
52  
53  
54  
55  
56  
57  
58  
59  
60

1  
2  
3 symptoms compared to healthy controls[19,34,35]. This can be explained by the fact  
4 that patients that were included in our study experienced shoulder pain of a long  
5 duration, meaning chronicity of symptoms. In this context, the firing pattern of scapular  
6 muscle units can change, generating an early SUR in an attempt to avoid pain. This  
7 altered pattern has been found in a recent study[36] . It can be hypothesized that early  
8 stages of SAPS could present a deficit in SUR while more advanced stages can develop  
9 a compensatory increased SUR. As this was not measured in this study, further  
10 investigation is needed to confirm that. In other shoulder conditions, current research  
11 analysing SUR in both symptomatic and pain-free shoulders does not sustain strong  
12 conclusions. Kijima et al.[37] showed an absence of differences in SUR, measured by a  
13 3-dimensional scapular kinematic analysis, in symptomatic rotator cuff tears,  
14 contralateral shoulder and healthy shoulders. Furthermore, Hung et al.[38]reported no  
15 differences in SUR, measured by 3-dimensional analysis, in patients with glenohumeral  
16 instability and healthy controls.

17  
18  
19  
20  
21  
22  
23  
24  
25  
26  
27  
28  
29  
30  
31  
32  
33  
34  
35  
36  
37 With regard to the pectoralis minor length, there was an absence of statistical significant  
38 difference between the symptomatic and the asymptomatic shoulders, as well as in  
39 symptomatic shoulder patients when compared with controls. This finding was contrary  
40 to what was expected, since a more anterior tilted positioning of the scapula is thought  
41 to be correlated with a potential risk of SAPS. Our results are in line with those obtained  
42 by Struyf et al.[14] The aforementioned study showed PMI values of 9.17 (SD 0.54) in  
43 the dominant side in the control group,9.66 (SD 0.68) in the symptomatic side and 9.64  
44 (SD 0.72) in the asymptomatic side in the patient group, but they did not study the  
45 statistical differences between groups. On the other hand, Lewis et al. [15]also reported  
46 values that analysed pectoralis minor length. Nevertheless, comparisons with the  
47  
48  
49  
50  
51  
52  
53  
54  
55  
56  
57  
58  
59  
60

1  
2  
3 present study are not possible as the used test was different (acromion-table distance  
4 test). To our knowledge there are no studies investigating these potential differences.  
5  
6 Previous studies[12]have found a similar scapular behaviour to those suffering from  
7  
8 SIS, in healthy subjects with a shortened pectoralis minor. Likewise, pectoralis minor  
9  
10 length presents a weak positive correlation with the acromiohumeral distance in healthy  
11  
12 male athletes[29], which means that the pectoralis minor could have a slight influence in  
13  
14 the scapular positioning in the case of shortening. However, based on the results  
15  
16 obtained in the present study, and also on previous inconsistent evidence on this topic  
17  
18 [6][10],a shortened pectoralis minor does not seem to play a key role in patients with  
19  
20 chronic SAPS, when compared to contralateral non-affected shoulders and control  
21  
22 subjects.  
23  
24  
25  
26  
27  
28  
29

30  
31 In relation to levator scapulae length, there was an absence of differences between  
32  
33 symptomatic and asymptomatic shoulder in patients, and between symptomatic  
34  
35 shoulder and controls in this study. As far as we know, this is the first study that  
36  
37 analyses such differences between subjects with shoulder symptoms and controls, so  
38  
39 comparisons with others are difficult. It is thought that a shortened levator scapulae can  
40  
41 produce a scapula more downwardly rotated[13] and, hence, a greater compromise of  
42  
43 the subacromial space during overhead movements. As we did not determine the  
44  
45 scapular position in this study, a conclusion on the absence of differences in levator  
46  
47 scapulae length in different groups cannot be made, thus further studies are needed in  
48  
49 this field.  
50  
51  
52  
53  
54  
55

56 Some strong points from this study need to be mentioned. First, an exhaustive  
57  
58 ultrasound and clinical assessment to avoid the inclusion of patients with rotator cuff  
59  
60

1  
2  
3 tears, was carried out. Second, the examiner who assessed all the measurements had  
4  
5 extensive clinical experience.  
6

7  
8 On the other hand, some limitations need to be recognized. As only one examiner  
9  
10 assessed all the outcome measures, inter-rater reliability was not calculated, so this  
11  
12 could introduce bias. Moreover, as the minimal clinically important difference of SUR  
13  
14 is unknown, we cannot make a conclusion as to whether the differences found in this  
15  
16 study have clinical importance or not. Our results should be taken with caution when  
17  
18 interpreted, as a sample with chronic SAPS was studied, so we do not know if these  
19  
20 results can be extrapolated to other populations, e.g. acute shoulder pain. Lastly,  
21  
22 including healthy controls by using a SPADI score below 15 points could mean bias.  
23  
24  
25

26  
27  
28 The present results could have clinical implications, and could contribute to increase the  
29  
30 body of knowledge in the field of scapular biomechanic tests. First, it seems that  
31  
32 pectoralis minor and/or levator scapulae are not distinguishing factors when comparing  
33  
34 the symptomatic and the contralateral asymptomatic shoulder in subjects suffering from  
35  
36 SAPS. Second, the use of the SUR test at 45°, 90° and 135° of shoulder elevation may  
37  
38 be useful in the assessment of shoulder conditions when compared to values from  
39  
40 control subjects.  
41  
42  
43  
44  
45

46  
47 Further research that analyses levator scapulae length and scapular positioning, and the  
48  
49 minimal clinical important difference in SUR, would contribute to enhance knowledge  
50  
51 in this field. Moreover, studies analysing changes in SUR and pectoralis minor length  
52  
53 after application of physical therapies are necessary to corroborate their contribution, as  
54  
55 indicators of improvement, when patients with chronic SAPS are treated.  
56  
57  
58  
59  
60

1  
2  
3 In conclusion, SUR is greater in patients with chronic SAPS when compared with  
4 controls at different angles of shoulder elevation, and is also greater in PMI values at  
5 rest position. The usefulness of the present findings is theorized, but further studies to  
6 confirm this in clinical practice are needed.  
7  
8  
9  
10  
11  
12  
13  
14  
15  
16  
17  
18  
19

#### 20 Contributor ship statement

21  
22  
23 The presented work follows the ICMJE recommends for authorship, based on the  
24 following 4 criteria:  
25

26 All authors have made substantial contributions to the conception or design of the work  
27 (SNL and ALS); or the acquisition (SNL, MFS and ALS), analysis (JMMA and ALS),  
28 or interpretation of data for the work (SNL, and ALS); AND  
29

30 Drafting the work or revising it critically for important intellectual content (SNL, MFS,  
31 FS, JMC, JMMA and ALS); AND  
32

33 Final approval of the version to be published (SNL, MFS, FS, JMC, JMMA and ALS);  
34 AND  
35

36 Agreement to be accountable for all aspects of the work in ensuring that questions  
37 related to the accuracy or integrity of any part of the work are appropriately investigated  
38 and resolved.  
39

40 In addition, authors have confidence in the integrity of the contributions of their co-  
41 authors.  
42  
43  
44  
45  
46  
47  
48  
49

#### 50 Competing interests

51  
52 All authors state that the funders had no role in the study and they have no conflicts of  
53 interest to declare. All authors have made a substantial scientific contribution to the  
54 study and they are thoroughly familiar with the primary data. All authors have read the  
55 complete manuscript and take responsibility for the content and completeness of it and  
56  
57  
58  
59  
60

1  
2  
3 understand that if the paper, or any part of it, is found to be faulty or fraudulent, all  
4 authors share responsibility.  
5  
6  
7

## 8 Funding

9  
10  
11 This research did not receive any specific grant from funding agencies in the public,  
12 commercial, or not-for-profit sectors.  
13  
14  
15  
16

## 17 Data sharing statement

18  
19  
20 The data sharing statement is currently not available due to a secondary analysis is  
21 being made. However, the available data can be obtained by contacting the  
22 corresponding author when the whole work is finished.  
23  
24  
25  
26  
27  
28  
29  
30

## 31 REFERENCES

- 32  
33  
34 1 Herin F, Vézina M, Thaon I, *et al.* Predictors of chronic shoulder pain after 5  
35 years in a working population. *Pain* 2012;**153**:2253–9.  
36 doi:10.1016/j.pain.2012.07.024  
37  
38  
39  
40 2 Luime J, Koes B, Hendriksen I, *et al.* Prevalence and incidence of shoulder pain  
41 in the general population; a systematic review. *Scand J Rheumatol* 2004;**33**:73–  
42 81. doi:16167509  
43  
44  
45  
46  
47 3 Bergman GJ, Winters JC, Groenier KH, *et al.* Manipulative Therapy in Addition  
48 to Usual Care for Patients With Shoulder Complaints: Results of Physical  
49 Examination Outcomes in a Randomized Controlled Trial. *J Manipulative*  
50 *Physiol Ther* 2010;**33**:96–101. doi:10.1016/j.jmpt.2009.12.004  
51  
52  
53  
54  
55  
56 4 Roquelaure Y, Ha C, Leclerc A, *et al.* Epidemiologic surveillance of upper-  
57 extremity musculoskeletal disorders in the working population. *Arthritis Care*  
58  
59  
60



- 1  
2  
3 *Res* 2006;**55**:765–78. doi:10.1002/art.22222  
4  
5  
6 5 Linsell L, Dawson J, Zondervan K, *et al.* Prevalence and incidence of adults  
7 consulting for shoulder conditions in UK primary care; patterns of diagnosis and  
8 referral. *Rheumatology* 2006;**45**:215–21. doi:10.1093/rheumatology/kei139  
9  
10  
11  
12 6 Ratcliffe E, Pickering S, Mclean S, *et al.* Is there a relationship between  
13 subacromial impingement syndrome and scapular orientation? A systematic  
14 review. *Br J Sport Med* 2014;**48**:1251–6. doi:10.1136/bjsports-2013-092389  
15  
16  
17  
18  
19 7 McCreesh KM, Crotty JM, Lewis JS. Acromiohumeral distance measurement in  
20 rotator cuff tendinopathy: is there a reliable, clinically applicable method? A  
21 systematic review. *Br J Sports Med* 2013;**47**:298–305. doi:10.1136/bjsports-2012-  
22 092063  
23  
24  
25  
26  
27  
28 8 Diercks R, Bron C, Dorrestijn O, *et al.* Guideline for diagnosis and treatment of  
29 subacromial pain syndrome. *Acta Orthop* 2014;**85**:314–22.  
30  
31  
32  
33  
34  
35  
36 9 van der Windt DA, Koes BW, Boeke AJ, *et al.* Shoulder disorders in general  
37 practice: prognostic indicators of outcome. *Br J Gen Pract* 1996;**46**:519–23.  
38  
39  
40  
41  
42 10 Timmons MK, Thigpen CA, Seitz AL, *et al.* Scapular Kinematics and  
43 Subacromial-Impingement Syndrome : A Meta-Analysis. 2012;**47**:354–70.  
44  
45  
46  
47 11 Kibler WB, Ludewig PM, McClure PW, *et al.* Clinical implications of scapular  
48 dyskinesis in shoulder injury: the 2013 consensus statement from the ‘scapular  
49 summit’. *Br J Sports Med* 2013;**47**:877–85. doi:10.1136/bjsports-2013-092425  
50  
51  
52  
53  
54 12 Borstad JD, Ludewig PM. The effect of long versus short pectoralis minor resting  
55 length on scapular kinematics in healthy individuals. *J Orthop Sports Phys Ther*  
56 2005;**35**:227–38. doi:10.2519/jospt.2005.35.4.227  
57  
58  
59 13 Lee JH, Cynn HS, Choi WJ, *et al.* Reliability of levator scapulae index in  
60

- 1  
2  
3 subjects with and without scapular downward rotation syndrome. *Phys Ther*  
4  
5 *Sport* 2016;**19**:1–6. doi:10.1016/j.pts.2015.07.002  
6  
7  
8 14 Struyf F, Meeus M, Fransen E, *et al.* Interrater and intrarater reliability of the  
9  
10 pectoralis minor muscle length measurement in subjects with and without  
11  
12 shoulder impingement symptoms. *Man Ther* 2014;:1–5.  
13  
14 doi:10.1016/j.math.2014.04.005  
15  
16  
17 15 Lewis JS, Valentine RE. The pectoralis minor length test : a study of the intra-  
18  
19 rater reliability symptoms. *BMC Musculoskelet Disord* 2007;**10**:1–10.  
20  
21 doi:10.1186/1471-2474-8-64  
22  
23  
24 16 Rosa DP, Borstad JD, Pires ED, *et al.* Reliability of measuring pectoralis minor  
25  
26 muscle resting length in subjects with and without signs of shoulder  
27  
28 impingement. *Brazilian J Phys Ther* 2016;**20**:176–83. doi:10.1590/bjpt-  
29  
30 rbf.2014.0146  
31  
32  
33 17 Rosa DP, Santos R V., Gava V, *et al.* Shoulder external rotation range of motion  
34  
35 and pectoralis minor length in individuals with and without shoulder pain.  
36  
37 *Physiother Theory Pract* 2018;**16**:1–9. doi:10.1080/09593985.2018.1459985  
38  
39  
40 18 Rosa DP, Borstad JD, Pogetti LS, *et al.* Effects of a stretching protocol for the  
41  
42 pectoralis minor on muscle length , function , and scapular kinematics in  
43  
44 individuals with and without shoulder pain. *J Hand Ther* 2016;:1–9.  
45  
46  
47 19 Struyf F, Nijs J, Baeyens JP, *et al.* Scapular positioning and movement in  
48  
49 unimpaired shoulders, shoulder impingement syndrome, and glenohumeral  
50  
51 instability. *Scand J Med Sci Sport* 2011;**21**:352–8. doi:10.1111/j.1600-  
52  
53 0838.2010.01274.x  
54  
55  
56 20 Ellenbecker TS, Cools A. Rehabilitation of shoulder impingement syndrome and  
57  
58 rotator cuff injuries: an evidence-based review. *Br J Sports Med* 2010;**44**:319–27.  
59  
60

- 1  
2  
3 doi:10.1136/bjism.2009.058875  
4  
5  
6 21 Struyf F, Nijs J, Mottram S, *et al.* Clinical assessment of the scapula: a review of  
7  
8 the literature. *Br J Sports Med* 2014;**48**:883–90. doi:10.1136/bjsports-2012-  
9  
10 091059  
11  
12 22 Larsen CM, Juul-kristensen B, Lund H, *et al.* Measurement properties of existing  
13  
14 clinical assessment methods evaluating scapular positioning and function . A  
15  
16 systematic review. 2014;**3985**:453–82. doi:10.3109/09593985.2014.899414  
17  
18  
19 23 Groef A De, Kampen M Van, Vervloesem N, *et al.* Ac ce pt us t. *Physiotherapy*  
20  
21 Published Online First: 2016. doi:10.1016/j.physio.2016.07.002  
22  
23  
24 24 Kibler W Ben, Sciascia A. Current concepts : scapular dyskinesis Current  
25  
26 concepts : scapular dyskinesis. *Sport Med* 2010;:300–5.  
27  
28 doi:10.1136/bjism.2009.058834  
29  
30  
31 25 Cools a M, Cambier D, Witvrouw EE. Screening the athlete’s shoulder for  
32  
33 impingement symptoms: a clinical reasoning algorithm for early detection of  
34  
35 shoulder pathology. *Br J Sports Med* 2008;**42**:628–35.  
36  
37  
38 26 Wiener SN, Seitz WH. Sonography of the shoulder in patients with tears of the  
39  
40 rotator cuff: Accuracy and value for selecting surgical options. *Am J Roentgenol*  
41  
42 1993;**160**:103–7. doi:10.1177/875647939300900224  
43  
44  
45 27 Engebretsen K, Grotle M, Bautz-Holter E, Ekeberg OM BJ. Predictors of  
46  
47 shoulder pain and disability index (SPADI) and work status after 1 year in  
48  
49 patients with subacromial shoulder pain. *BMC Musculoskelet Disord*  
50  
51 2010;**11**:218.  
52  
53  
54 28 Watson L, Balster S, Finch C, *et al.* Measurement of scapula upward rotation: a  
55  
56 reliable clinical procedure. *Br J Sports Med* 2005;**39**:599–603.  
57  
58 doi:10.1136/bjism.2004.013243  
59  
60

- 1  
2  
3 29 Tanya Mackenzie, Lee Herrington, Lenard Funk AC. Relationship between  
4 extrinsic factors and acromio-humeral distance. *Man Ther* Published Online  
5 First: 2016. doi:10.1016/j.math.2016.02.005  
6  
7  
8  
9  
10 30 Roach KE, Budiman-Mak E, Songsiridej N, *et al.* Development of a shoulder  
11 pain and disability index. *Arthritis Care Res* 1991;**4**:143–9.  
12  
13 doi:10.1002/art.1790040403  
14  
15  
16  
17 31 MacDermid JC, Solomon P, Prkachin K. The Shoulder Pain and Disability Index  
18 demonstrates factor, construct and longitudinal validity. *BMC Musculoskelet*  
19 *Disord* 2006;**7**:12. doi:10.1186/1471-2474-7-12  
20  
21  
22  
23  
24 32 Membrilla-Mesa MD, Cuesta-Vargas AI, Pozuelo-Calvo R, *et al.* Shoulder pain  
25 and disability index: Cross cultural validation and evaluation of psychometric  
26 properties of the Spanish version. *Health Qual Life Outcomes* 2015;**13**:1–6.  
27  
28  
29  
30  
31  
32  
33 33 Portney LG, Watkins MP. Statistical measures of reliability. In: *Foundations of*  
34 *clinical research : applications to practice*. 2000. 557–86.  
35  
36  
37  
38 34 Turgut E, Duzgun I, Baltaci G. Scapular asymmetry in participants with and  
39 without shoulder impingement syndrome; a three-dimensional motion analysis.  
40  
41  
42  
43  
44  
45 35 Ludewig PM, Cook TM. Alterations in Shoulder Kinematics and Associated  
46 Muscle Activity in People With Symptoms of Shoulder Impingement Research  
47 Report Alterations in Shoulder Kinematics and Associated Muscle Activity in  
48 People With. *Phys Ther* 2000;**80**:276–91.  
49  
50  
51  
52  
53  
54 36 Michener LA, Sharma S, Cools AM, *et al.* Relative scapular muscle activity  
55 ratios are altered in subacromial pain syndrome. *J Shoulder Elb Surg* Published  
56  
57  
58  
59  
60  
Online First: 2016. doi:10.1016/j.jse.2016.04.010

- 1  
2  
3 37 Kijima T, Matsuki K, Ochiai N, *et al.* In vivo 3-dimensional analysis of scapular  
4 and glenohumeral kinematics : comparison of symptomatic or asymptomatic  
5 shoulders with rotator cuff tears and healthy shoulders. *J Shoulder Elb Surg*  
6 2015;**24**:1817–26. doi:10.1016/j.jse.2015.06.003  
7  
8  
9  
10  
11  
12 38 Hung Y, Darling WG. Scapular Orientation During Planar and Three-  
13 dimensional Upper Limb Movements in Individuals with Anterior Glenohumeral  
14 Joint Instability. Published Online First: 2013. doi:10.1002/pri.1558  
15  
16  
17  
18  
19  
20  
21  
22  
23  
24  
25

## 26 LEGENDS

27  
28 Figure 1: Scapular upward rotation measurement.

29  
30 Figure 2: Pectoralis minor length measurement.

31  
32 Figure 3: Levator scapulae length measurement.  
33  
34  
35  
36  
37  
38  
39  
40  
41  
42  
43  
44  
45  
46  
47  
48  
49  
50  
51  
52  
53  
54  
55  
56  
57  
58  
59  
60

1  
2  
3  
4  
5  
6  
7  
8  
9  
10  
11  
12  
13  
14  
15  
16  
17  
18  
19  
20  
21  
22  
23  
24  
25  
26  
27  
28  
29  
30  
31  
32  
33  
34  
35  
36  
37  
38  
39  
40  
41  
42  
43  
44  
45  
46  
47  
48  
49  
50  
51  
52  
53  
54  
55  
56  
57  
58  
59  
60

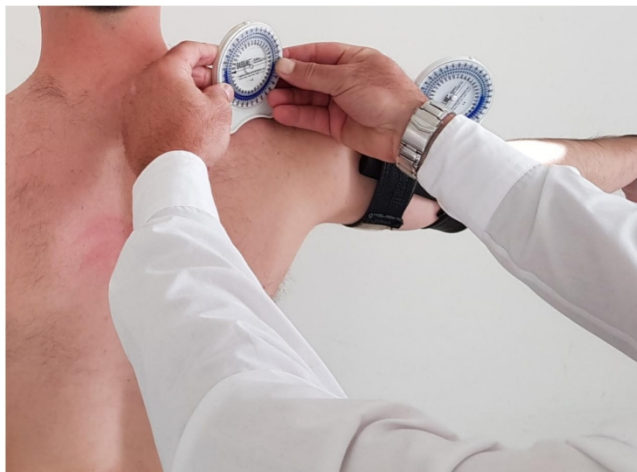

583x825mm (72 x 72 DPI)

1  
2  
3  
4  
5  
6  
7  
8  
9  
10  
11  
12  
13  
14  
15  
16  
17  
18  
19  
20  
21  
22  
23  
24  
25  
26  
27  
28  
29  
30  
31  
32  
33  
34  
35  
36  
37  
38  
39  
40  
41  
42  
43  
44  
45  
46  
47  
48  
49  
50  
51  
52  
53  
54  
55  
56  
57  
58  
59  
60

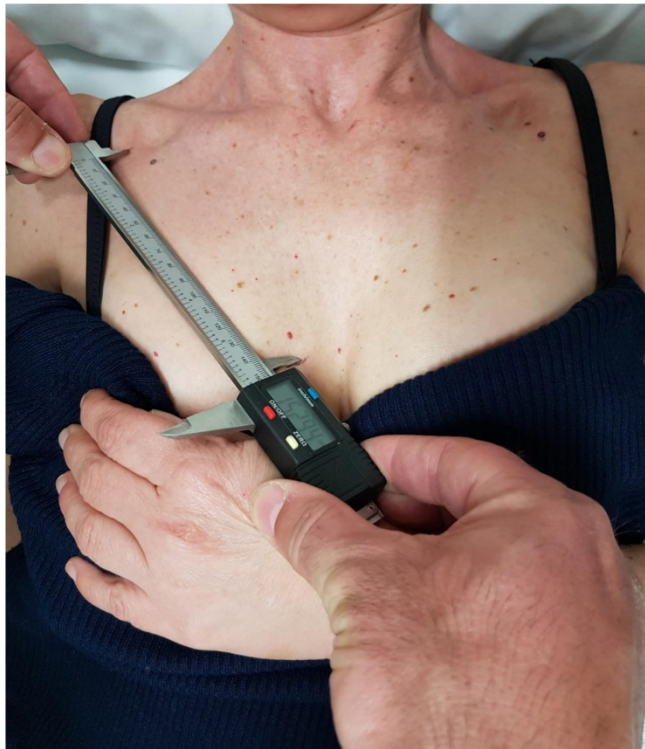

583x825mm (72 x 72 DPI)

1  
2  
3  
4  
5  
6  
7  
8  
9  
10  
11  
12  
13  
14  
15  
16  
17  
18  
19  
20  
21  
22  
23  
24  
25  
26  
27  
28  
29  
30  
31  
32  
33  
34  
35  
36  
37  
38  
39  
40  
41  
42  
43  
44  
45  
46  
47  
48  
49  
50  
51  
52  
53  
54  
55  
56  
57  
58  
59  
60

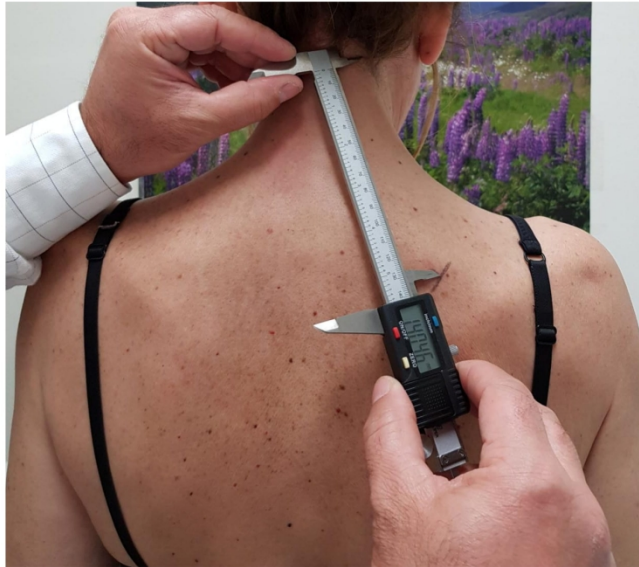

583x825mm (72 x 72 DPI)



## STROBE Statement—checklist of items that should be included in reports of observational studies

|                              | Item No | Recommendation                                                                                                                                                                                                                                                                                                                                                                                                                                                                                                                                                                                                                                                                                                 |
|------------------------------|---------|----------------------------------------------------------------------------------------------------------------------------------------------------------------------------------------------------------------------------------------------------------------------------------------------------------------------------------------------------------------------------------------------------------------------------------------------------------------------------------------------------------------------------------------------------------------------------------------------------------------------------------------------------------------------------------------------------------------|
| <b>Title and abstract</b>    | 1       | (a) Indicate the study's design with a commonly used term in the title or the abstract<br>(b) Provide in the abstract an informative and balanced summary of what was done and what was found <b>PAGE 1</b>                                                                                                                                                                                                                                                                                                                                                                                                                                                                                                    |
| <b>Introduction</b>          |         |                                                                                                                                                                                                                                                                                                                                                                                                                                                                                                                                                                                                                                                                                                                |
| Background/rationale         | 2       | Explain the scientific background and rationale for the investigation being reported <b>PAGE 3</b>                                                                                                                                                                                                                                                                                                                                                                                                                                                                                                                                                                                                             |
| Objectives                   | 3       | State specific objectives, including any prespecified hypotheses <b>PAGE 4</b>                                                                                                                                                                                                                                                                                                                                                                                                                                                                                                                                                                                                                                 |
| <b>Methods</b>               |         |                                                                                                                                                                                                                                                                                                                                                                                                                                                                                                                                                                                                                                                                                                                |
| Study design                 | 4       | Present key elements of study design early in the paper <b>PAGE 4</b>                                                                                                                                                                                                                                                                                                                                                                                                                                                                                                                                                                                                                                          |
| Setting                      | 5       | Describe the setting, locations, and relevant dates, including periods of recruitment, exposure, follow-up, and data collection <b>PAGE 4</b>                                                                                                                                                                                                                                                                                                                                                                                                                                                                                                                                                                  |
| Participants                 | 6       | (a) <i>Cohort study</i> —Give the eligibility criteria, and the sources and methods of selection of participants. Describe methods of follow-up<br><i>Case-control study</i> —Give the eligibility criteria, and the sources and methods of case ascertainment and control selection. Give the rationale for the choice of cases and controls<br><i>Cross-sectional study</i> —Give the eligibility criteria, and the sources and methods of selection of participants<br>(b) <i>Cohort study</i> —For matched studies, give matching criteria and number of exposed and unexposed<br><i>Case-control study</i> —For matched studies, give matching criteria and the number of controls per case <b>PAGE 5</b> |
| Variables                    | 7       | Clearly define all outcomes, exposures, predictors, potential confounders, and effect modifiers. Give diagnostic criteria, if applicable <b>PAGE 6-7-8</b>                                                                                                                                                                                                                                                                                                                                                                                                                                                                                                                                                     |
| Data sources/<br>measurement | 8*      | For each variable of interest, give sources of data and details of methods of assessment (measurement). Describe comparability of assessment methods if there is more than one group <b>PAGE 6-7-8</b>                                                                                                                                                                                                                                                                                                                                                                                                                                                                                                         |
| Bias                         | 9       | Describe any efforts to address potential sources of bias <b>PAGE 8</b>                                                                                                                                                                                                                                                                                                                                                                                                                                                                                                                                                                                                                                        |
| Study size                   | 10      | Explain how the study size was arrived at <b>PAGE 9</b>                                                                                                                                                                                                                                                                                                                                                                                                                                                                                                                                                                                                                                                        |
| Quantitative variables       | 11      | Explain how quantitative variables were handled in the analyses. If applicable, describe which groupings were chosen and why <b>PAGE 9</b>                                                                                                                                                                                                                                                                                                                                                                                                                                                                                                                                                                     |
| Statistical methods          | 12      | (a) Describe all statistical methods, including those used to control for confounding<br>(b) Describe any methods used to examine subgroups and interactions <b>PAGE 9</b><br>(c) Explain how missing data were addressed<br>(d) <i>Cohort study</i> —If applicable, explain how loss to follow-up was addressed<br><i>Case-control study</i> —If applicable, explain how matching of cases and controls was addressed<br><i>Cross-sectional study</i> —If applicable, describe analytical methods taking account of sampling strategy<br>(e) Describe any sensitivity analyses                                                                                                                                |

Continued on next page

**Results**

|                  |     |                                                                                                                                                                                                                                                                                                                                                                                                                                 |
|------------------|-----|---------------------------------------------------------------------------------------------------------------------------------------------------------------------------------------------------------------------------------------------------------------------------------------------------------------------------------------------------------------------------------------------------------------------------------|
| Participants     | 13* | (a) Report numbers of individuals at each stage of study—eg numbers potentially eligible, examined for eligibility, confirmed eligible, included in the study, completing follow-up, and analysed <b>PAGE 9-12</b><br>(b) Give reasons for non-participation at each stage<br>(c) Consider use of a flow diagram                                                                                                                |
| Descriptive data | 14* | (a) Give characteristics of study participants (eg demographic, clinical, social) and information on exposures and potential confounders <b>PAGE 10</b><br>(b) Indicate number of participants with missing data for each variable of interest<br>(c) <i>Cohort study</i> —Summarise follow-up time (eg, average and total amount)                                                                                              |
| Outcome data     | 15* | <i>Cohort study</i> —Report numbers of outcome events or summary measures over time<br><i>Case-control study</i> —Report numbers in each exposure category, or summary measures of exposure <b>PAGE 9-12</b><br><i>Cross-sectional study</i> —Report numbers of outcome events or summary measures                                                                                                                              |
| Main results     | 16  | (a) Give unadjusted estimates and, if applicable, confounder-adjusted estimates and their precision (eg, 95% confidence interval). Make clear which confounders were adjusted for and why they were included <b>PAGE 11-12</b><br>(b) Report category boundaries when continuous variables were categorized<br>(c) If relevant, consider translating estimates of relative risk into absolute risk for a meaningful time period |
| Other analyses   | 17  | Report other analyses done—eg analyses of subgroups and interactions, and sensitivity analyses                                                                                                                                                                                                                                                                                                                                  |

**Discussion**

|                  |    |                                                                                                                                                                                              |
|------------------|----|----------------------------------------------------------------------------------------------------------------------------------------------------------------------------------------------|
| Key results      | 18 | Summarise key results with reference to study objectives <b>PAGE 12</b>                                                                                                                      |
| Limitations      | 19 | Discuss limitations of the study, taking into account sources of potential bias or imprecision. Discuss both direction and magnitude of any potential bias <b>PAGE 15</b>                    |
| Interpretation   | 20 | Give a cautious overall interpretation of results considering objectives, limitations, multiplicity of analyses, results from similar studies, and other relevant evidence <b>PAGE 12-14</b> |
| Generalisability | 21 | Discuss the generalisability (external validity) of the study results <b>PAGE 15-16</b>                                                                                                      |

**Other information**

|         |    |                                                                                                                                                                                     |
|---------|----|-------------------------------------------------------------------------------------------------------------------------------------------------------------------------------------|
| Funding | 22 | Give the source of funding and the role of the funders for the present study and, if applicable, for the original study on which the present article is based <b>NON APPLICABLE</b> |
|---------|----|-------------------------------------------------------------------------------------------------------------------------------------------------------------------------------------|

\*Give information separately for cases and controls in case-control studies and, if applicable, for exposed and unexposed groups in cohort and cross-sectional studies.

**Note:** An Explanation and Elaboration article discusses each checklist item and gives methodological background and published examples of transparent reporting. The STROBE checklist is best used in conjunction with this article (freely available on the Web sites of PLoS Medicine at <http://www.plosmedicine.org/>, Annals of Internal Medicine at <http://www.annals.org/>, and Epidemiology at <http://www.epidem.com/>). Information on the STROBE Initiative is available at [www.strobe-statement.org](http://www.strobe-statement.org).

# BMJ Open

**Differences in scapular upward rotation, pectoralis minor and levator scapulae muscle length between the symptomatic, the contralateral asymptomatic shoulder and control subjects: A cross-sectional study in a Spanish primary care setting.**

|                                 |                                                                                                                                                                                                                                                                                                                                                                                                                   |
|---------------------------------|-------------------------------------------------------------------------------------------------------------------------------------------------------------------------------------------------------------------------------------------------------------------------------------------------------------------------------------------------------------------------------------------------------------------|
| Journal:                        | <i>BMJ Open</i>                                                                                                                                                                                                                                                                                                                                                                                                   |
| Manuscript ID                   | bmjopen-2018-023020.R3                                                                                                                                                                                                                                                                                                                                                                                            |
| Article Type:                   | Research                                                                                                                                                                                                                                                                                                                                                                                                          |
| Date Submitted by the Author:   | 22-Feb-2019                                                                                                                                                                                                                                                                                                                                                                                                       |
| Complete List of Authors:       | Navarro-Ledesma, Santiago; University of Granada, Physiotherapy<br>Fernandez-Sanchez, Manuel; Universidad De Almeria Facultad de Ciencias de la Educacion Enfermeria y Fisioterapia<br>STRUYF, FILIP; Universiteit Antwerpen Campus Drie Eiken, REHABILITATION SCIENCES<br>Martinez-Calderon, Javier<br>Miguel Morales-Asencio, Jose; Univ Malaga<br>LUQUE-SUAREZ, ALEJANDRO; UNIVERSITY OF MALAGA, PHYSIOTHERAPY |
| <b>Primary Subject Heading</b>: | Rehabilitation medicine                                                                                                                                                                                                                                                                                                                                                                                           |
| Secondary Subject Heading:      | Sports and exercise medicine                                                                                                                                                                                                                                                                                                                                                                                      |
| Keywords:                       | scapular kinematic, shoulder pain, chronic pain                                                                                                                                                                                                                                                                                                                                                                   |
|                                 |                                                                                                                                                                                                                                                                                                                                                                                                                   |

SCHOLARONE™  
Manuscripts

1  
2  
3 **Differences in scapular upward rotation, pectoralis minor and levator scapulae**  
4 **muscle length between the symptomatic, the contralateral asymptomatic shoulder**  
5 **and control subjects: A cross-sectional study in a Spanish primary care setting.**  
6  
7  
8

9  
10 Navarro-Ledesma S\*; Fernandez-Sanchez M; Struyf F; Martinez-Calderon J; Morales-  
11 Asencio JM; Luque-Suarez A  
12  
13  
14

15  
16 Corresponding author:

17  
18 Santiago Navarro-Ledesma (snl@ugr.es)

19  
20 Av. de la Ilustración, 60, 18016 Urb. los Vergeles, Granada, Spain

21  
22 00 34 951 952 853  
23  
24  
25

26  
27  
28 Santiago Navarro-Ledesma

29  
30 Department of Physiotherapy, University of Granada, Spain  
31  
32

33  
34 Manuel Fernandez-Sanchez

35  
36 Department of Nursing, Physiotherapy and Medicine, University of Almeria, Spain  
37  
38  
39

40  
41 Filip Struyf

42  
43 Department of Rehabilitation Sciences and Physiotherapy, University of Antwerp,  
44 Antwerpen, Belgium  
45  
46  
47  
48

49  
50 Javier Martinez-Calderon

51  
52 Department of Physiotherapy, University of Malaga, Spain  
53  
54  
55

56  
57 Jose M Morales Asencio

58  
59 Department of Nursing, University of Malaga, Spain  
60

1  
2  
3 Instituto de la Investigacion Biomedica de Malaga-IBIMA  
4  
5  
6

7 Alejandro Luque-Suarez  
8

9  
10 Department of Physiotherapy, University of Malaga, Spain  
11

12 Instituto de la Investigacion Biomedica de Malaga-IBIMA  
13  
14  
15

16  
17 Keywords: scapular kinematic; shoulder pain; chronic pain  
18  
19

20 Word count: 3468  
21  
22  
23  
24  
25  
26  
27  
28  
29  
30  
31  
32  
33  
34  
35  
36  
37  
38  
39  
40  
41  
42  
43  
44  
45  
46  
47  
48  
49  
50  
51  
52  
53  
54  
55  
56  
57  
58  
59  
60

## ABSTRACT

Objective: To determine the potential differences in both scapular positioning and scapular movement between the symptomatic and asymptomatic contralateral shoulder, in patients with unilateral subacromial pain syndrome (SAPS), and when compared to participants free of shoulder pain.

Setting: Three different primary care centres.

Participants: A sample of seventy-three patients with SAPS in their dominant arm was recruited, with a final sample size of fifty-four participants.

Primary outcome measures: The scapular upward rotation (SUR), the pectoralis minor and the levator scapulae muscles length tests were carried out.

Results: When symptomatic shoulders and controls were compared, an increased SUR at all positions (45, 90 and 135 degrees) was obtained in symptomatic shoulders (2/3,98/ 8,96 degrees respectively). These differences in SUR surpassed the minimal detectable change (MDC95) (0,91/1,55/2,83 degrees at 45/90/135 degrees of shoulder elevation). No differences were found in SUR between symptomatic and contralateral shoulders. No differences were found in either pectoralis minor or levator scapulae muscle length in all groups.

Conclusions: Scapular upward rotation was greater in patients with chronic SAPS compared to controls at different angles of shoulder elevation.

Keywords: scapular kinematic; shoulder pain; chronic pain

### **Strengths and limitations of this study**

An exhaustive ultrasound and clinical assessment was carried out to avoid the inclusion of patients with rotator cuff tears.

The examiner who assessed all the measurements was an experience clinical professional.

The inter-rater reliability was not calculated, so this could introduce bias.

The minimal clinically important difference for SUR is unknown, thus we cannot make a conclusion as to whether the differences found in this study reached clinical importance or not.

## INTRODUCTION

Shoulder pain is the most common musculoskeletal condition after neck pain and low back pain[1]. Shoulder pain point prevalence figures range from 6.9 to 26%, from 18.6 to 31% for 1-month prevalence, from 4.7 to 46.7% for 1-year prevalence, and from 6.7 to 66.7% for lifetime prevalence[2]. Furthermore, shoulder pain prevalence is even higher in women[3], in the working population[4], and increases with age[5].

Subacromial pain syndrome (SAPS) is the most common cause of shoulder pain[6,7]. It is defined as a non-traumatic, usually unilateral, shoulder disorder that causes localized pain around the acromion, often worsening during or subsequent lifting the arm[8]. The best therapeutic approach in SAPS is still under debate. Half of the patients with shoulder pain being attended in primary care do not completely recover after 6 months from their initial episode[9]. Thus, there is a need to explore different non-invasive strategies in these patients. One of the approaches that can be beneficial for the patient is to focus on the scapulothoracic joint. To date, there is inconsistent evidence to support a relationship between SAPS symptoms and scapular orientation[6,10]. The most common causative mechanism of an altered scapular positioning involves the soft tissue, such as inflexibility (tightness) and alterations in the periscapular muscles[11]. Specifically, both a decreased activation and strength of the serratus anterior, as well as alterations in upper/lower trapezius couple forces, can alter scapular upward rotation and posterior tilt [11]. Likewise, pectoralis minor, levator scapulae muscles[12,13] and biceps short head [11] have been traditionally assessed as their shortening may potentially influence scapular positioning.

Previous studies have reported normative values on pectoralis minor length in the dominant and non-dominant side in both symptomatic and control populations, by using the pectoralis minor index (PMI)[14] and the acromion-table distance test[15]. Recently,



1  
2  
3 pectoralis minor length and its shortening have received remarkable empirical attention,  
4  
5 in terms of studies of its reliability [16], its association with shoulder external  
6  
7 rotation[17], and as an outcome measure after a stretching program in participants with  
8  
9 shoulder pain[18]. However, differences between symptomatic groups and healthy  
10  
11 controls were not calculated. To the best of our knowledge, differences in the levator  
12  
13 scapulae index (LSI) between symptomatic and control populations have not been  
14  
15 determined yet. With regard to patterns of movement, there is conflicting evidence.  
16  
17 While some studies have shown association between a reduced scapular upward rotation  
18  
19 (SUR) and scapular posterior tilt in SAPS [19,20], others attained inconclusive  
20  
21 findings[6,10].  
22  
23  
24

25  
26 Advanced equipment exists to assess scapular positioning and kinematics. However,  
27  
28 most of them are very technical and highly expensive, which makes them almost  
29  
30 unattainable in the clinical practice[21]. In this regard, research states that the SUR  
31  
32 seems suitably evidence-based for clinical use, while pectoralis minor length  
33  
34 measurements should be used as supplementary clinical assessment methods in addition  
35  
36 to others[22,23]. Additionally, the levator scapulae muscle length measurement has  
37  
38 been shown to be a reliable tool, and it has been proposed as part of the scapula  
39  
40 assessment because the levator scapulae directly attaches in the superior angle of the  
41  
42 scapula[13] and thus it is another possible cause of scapular dysfunction[24].  
43  
44  
45

46  
47 Specifically, there is a lack of evidence on the potential differences in PMI, LSI and  
48  
49 SUR, between painful and contralateral non-painful shoulders, and control subjects. The  
50  
51 existence of differences in scapular positioning and pattern of movement could  
52  
53 contribute to steer physiotherapy treatments towards a scapular focused treatment  
54  
55 approach.  
56  
57  
58  
59  
60

Hence, the aim of this study was to analyse the differences in scapular positioning and pattern of movement, between the symptomatic and asymptomatic shoulder, in patients with unilateral chronic SAPS, and in controls, using three different tests: i) scapular upward rotation, ii) pectoralis minor muscle length and, iii) levator scapulae muscle length. The null hypothesis ( $H_0$ ) was that there are no differences in the groups in these three different tests. The alternative hypothesis ( $H_a$ ) was that there is an increased SUR in painful shoulder when comparing with contralateral and control shoulder, as well as a decreased both pectoralis minor and levator scapulae length in painful shoulder.

## METHOD

### Study design

This was a cross-sectional, observational study, carried out in accordance with the Declaration of Helsinki. Ethical approval was obtained from the Ethics Committee of the Health Care District where the primary care centres were located (PI9/012014). The study has been reported following the recommendations of the STROBE statement for observational studies. All the participants signed an informed consent.

### Participants

A sample of seventy-three patients with chronic SAPS in their dominant arm was recruited from three different primary care centres, with a final sample size of fifty-four participants obtained after applying the inclusion criteria. General practitioners (GPs) recruited the participants who were screened for eligibility by a research assistant. Participants had to meet the following inclusion criteria: (i) men or women aged between 18 to 55 years; (ii) unilateral pain located in the anterior and/or lateral shoulder region[8]; (iii) 2 out of 3 positive clinical tests (Hawkins-Kennedy; Jobe; Neer)[25]; (iv) pain with normal activity  $\geq 4/10$  on a visual analogue scale; (v) shoulder pain lasting

1  
2  
3 more than three months; (vi) a history of nontraumatic onset of shoulder pain.  
4  
5 Participants were ineligible to participate in this study if any of these conditions were  
6  
7 present: (i) history of significant shoulder trauma, such as fracture or ultrasonography-  
8  
9 clinically suspected full thickness cuff tear, following the classification of Wiener and  
10  
11 Seitz, 1993[26]; (ii) recent shoulder dislocation in the past two years; (iii) systemic  
12  
13 illnesses such as rheumatoid arthritis; (iv) adhesive capsulitis; (v) shoulder pain  
14  
15 originating from the neck or if there was a neurological impairment, osteoporosis,  
16  
17 haemophilia and/or malignancies.  
18  
19

20  
21 A sample of 40 participants with both shoulders free of pain for the last year was  
22  
23 selected. They were recruited from the same three primary care centres as the  
24  
25 participants with shoulder pain. Furthermore, to participate in the study, they had to  
26  
27 present: (i) a SPADI score  $\leq 15$  points, based on the minimal clinically detectable  
28  
29 change for this tool[27]; (ii) negative results for Neer test, Hawkins-Kennedy test and  
30  
31 Jobe test; (iii) no painful arc present during flexion or abduction; (iv) no pain during  
32  
33 resisted lateral rotation and/or abduction. Asymptomatic participants were specifically  
34  
35 age and gender matched to the symptomatic group.  
36  
37  
38  
39

#### 40 Outcome measurements

41  
42 All measurements were taken by a physiotherapist with more than 25 years of  
43  
44 experience, including height which was necessary to calculate PMI and LSI values. This  
45  
46 physiotherapist was blinded to the fact of participants having shoulder pain or not.  
47  
48

#### 49 *Scapular upward rotation (SUR)*

50  
51 The measurement of SUR was performed using two Plurimeter-V gravity reference  
52  
53 inclinometers[28]. One inclinometer was Velcro taped perpendicular to the humeral  
54  
55 shaft, just above the humeral epicondyle. At resting position, the humeral inclinometer  
56  
57 was calibrated as 0 degrees. Next, the patients were instructed to perform shoulder  
58  
59  
60

1  
2  
3 abduction in the coronal plane with full elbow extension and 45° of external humeral  
4  
5 rotation, with the thumb abducted. The patients were asked to stop at 45°, 90° and 135°  
6  
7 degrees of humeral abduction, where the SUR was measured with a second  
8  
9 inclinometer, manually aligned along the scapular spine (Figure 1). Three measurements  
10  
11 were collected at each position and then the mean was obtained. The arm was  
12  
13 repositioned between measurements.  
14  
15

#### 16 #FIGURE 1

##### 17 *Pectoralis minor length*

18  
19 The measurement of the pectoralis minor length was carried out with the participant in  
20  
21 the supine position. A small pillow was placed under the participant's head for comfort.  
22  
23 The participant's arm was passively placed along the side of the body in the neutral  
24  
25 position resting on the table[29]. Because of the variability among subjects this  
26  
27 measurement was best normalized creating a pectoralis minor index (PMI), which was  
28  
29 calculated by dividing the resting muscle length measurement by the subject height and  
30  
31 multiplying by 100, as previously described by Borstad et al[12]. Height was measured  
32  
33 with the patient in a standing position, by using a calliper placed at the top of the head  
34  
35 and marking a point on a scale placed on the wall. The resting muscle length was  
36  
37 measured from the caudal edge of the 4<sup>th</sup> rib to the inferomedial aspect of the coracoid  
38  
39 process with a sliding calliper (Figure 2). Pectoralis minor index values less than 7.65  
40  
41 have been identified as a shortened pectoralis minor, measured in standing position[12].  
42  
43 The measurement was taken during inspiration[14].  
44  
45  
46  
47  
48  
49  
50

#### 51 #FIGURE 2

##### 52 *Levator scapulae length*

53  
54 Participants were standing with their arms relaxed at their sides. The subjects were  
55  
56 asked to look directly ahead without any craniocervical movement[13]. The instruction  
57  
58  
59  
60

1  
2  
3 was to palpate two anatomical reference points in line that represent levator scapulae  
4 length: (1) the dorsal tubercles of the transverse processes of the second cervical  
5 vertebrae and (2) the superior angle of the medial borders of the scapula. The assessor  
6 used a skin-marker pencil to mark the reference points. The marks were cleaned  
7 immediately after each test session. The distance between these two bony reference  
8 points was measured with a sliding calliper (Figure 3). By creating a LSI (levator  
9 scapulae length [cm]/subjects' height [cm]\*100), the subjects' variability in body height  
10 was normalized[13]. The LSI was expressed as a percentage of the subjects' height.  
11  
12  
13  
14  
15  
16  
17  
18  
19  
20

### 21 # FIGURE 3

22  
23 The Shoulder Pain and Disability Index (SPADI) was assessed in all participants. The  
24 SPADI is composed of 13 questions and contains two domains: pain and disability. The  
25 score of the questionnaire ranges from 0 to 100, with very high scores indicating worse  
26 function. The numeric pain scale runs from 0 to 10, with 0 indicating no pain and 10  
27 representing the worst pain[30]. The SPADI has shown a good internal consistency with  
28 a Cronbach's alpha of 0.95 for the total score, 0.92 for the pain subscale and 0.93 for the  
29 disability subscale as well as the ability to detect change over time[31]. A Spanish  
30 version of the SPADI was used since English was not the native language for all the  
31 participants[32].  
32  
33  
34  
35  
36  
37  
38  
39  
40  
41  
42  
43

### 44 Data analysis

45  
46 The Statistical Package for the Social Sciences (version 23.0 for Mac; SPSS Inc.  
47 Chicago, IL) was used to analyse the collected data. Normality for all variables was  
48 explored using the Kolmogorov Smirnov test for the group of participants with shoulder  
49 pain (affected and non-affected), and for the control subjects. Two different analysis  
50 strategies were carried out: first, to determine differences in SUR at different degrees of  
51 abduction, a repeated measures ANOVA was developed in every group. For this  
52  
53  
54  
55  
56  
57  
58  
59  
60

analysis, F statistic was adjusted in case of non-sphericity (tested by Mauchly's test), with the Greenhouse-Geisser correction. Second, to determine between-groups differences for all the outcome measurements, one-way ANOVA test was calculated with Bonferroni and Tukey post-hoc estimations. A p-value less than 0.05 was considered statistically significant.

The intraclass correlation coefficient was greater than 0.90 for all the tests, which means an excellent reliability[33], except for LSI (0.87). The MDC95 was as follows: SUR45°= 0.91; SUR90°= 1.55; SUR135°= 2.83; PMI= 0.80; LSI= 1.08.

#### Patient and Public Involvement

The participation of all subjects was voluntary, and no incentives were given to encourage enrollment. Patients with shoulder pain from each primary care center were not involved neither in the design of the study nor in the recruitment of the participants. The results of the present study were sent by e-mail to those participants who wanted to be informed.

## RESULTS

### *Sample characteristics*

Demographic characteristics are shown in Table 1. There were not significant differences between groups in terms of gender and age.

|               | Patients (mean and SD)<br>(dominant and non<br>dominant shoulder) | Healthy subjects (mean and SD)<br>(dominant shoulder) |
|---------------|-------------------------------------------------------------------|-------------------------------------------------------|
| Age (yrs; CI) | 46.39 (9.96)                                                      | 46.42 (7.02)                                          |
| Women         | 33 (61.1%)                                                        | 23 (57.5 %)                                           |

|                        |                                                           |             |
|------------------------|-----------------------------------------------------------|-------------|
| Men                    | 21 (38.9%)                                                | 17 (42.5 %) |
| SPADI (CI)             | 56.37 (20.01)                                             | 2.66 (2.88) |
| Chronicity of symptoms | 3-6months: 18<br>6-12 months: 5<br>More than one year: 31 | N/A         |

Table 1: Demographic characteristics; Mean (95% CI); N/A: non-applicable; CI= confidence interval; SPADI: shoulder pain and disability index

*Mean values for the outcome measures and intra-rater reliability data*

Mean values of scapular upward rotation (expressed in degrees), levator scapulae index (LSI) and pectoralis minor index (PMI) for all the groups are presented in Table 2. There were statistically significant differences in SUR when comparing the three groups, while no differences were found for the rest of the outcome measurements (LSI and PMI) (see Table 2). Furthermore, there was an increase in SUR from 45 to 90 and 135 degrees of shoulder abduction for all the groups, analysed by repeated measures ANOVA, with the following results: (i) symptomatic shoulder:  $F(1,51; 80.05) = 1009.22$ ;  $p < 0.001$ ; (ii) asymptomatic shoulder:  $F(1,46; 77.37) = 1356.57$ ;  $p < 0.001$ ; (iii) healthy controls:  $F(1,46; 56.89) = 1196.18$ ;  $p < 0.001$

|                      | Symptomatic shoulder      | Asymptomatic shoulder     | Healthy controls          | F              | p       |
|----------------------|---------------------------|---------------------------|---------------------------|----------------|---------|
| SUR                  |                           |                           |                           |                |         |
| 45° of GH abduction  | 4.55<br>(3.79 to 5.32)    | 5.71<br>(4.82 to 6.60)    | 2.55<br>(1.81 to 3.29)    | F(2,145)=14.14 | <0.001* |
| 90° of GH abduction  | 20.75<br>(18.81 to 22.69) | 21.42<br>(19.88 to 22.96) | 16.77<br>(15.49 to 18.04) | F(2,145)=8.08  | <0.001* |
| 135° of GH abduction | 45.18<br>(42.76 to 47.59) | 44.16<br>(42.20 to 46.12) | 36.22<br>(34.34 to 38.09) | F(2,145)=18.64 | <0.001* |
| LSI                  | 7.81<br>(7.42 to 8.20)    | 7.81<br>(7.53 to 8.30)    | 7.76<br>(7.42 to 8.11)    | F(2,145)=0.02  | 0.978   |
| PMI                  | 10.52<br>(10.27 to 10.76) | 10.86<br>(10.26 to 11.46) | 10.07<br>(9.73 to 10.42)  | F(2,145)=2.97  | 0.054   |

Table 2: Mean values (95%CI: confidence interval) of pectoralis minor index (PMI), levator scapulae index (LSI), and scapular upward rotation expressed in degrees (SUR) in different groups; F: One-factor ANOVA for differences in symptomatic, asymptomatic and healthy controls. Bonferroni post-hoc analysis were carried out.

\*: statistically significant ( $p < .01$ ).

#### *Differences in SUR, PMI and LSI between groups*

Comparisons between groups are described in detail in Table 3. There were statistical significant differences in SUR between symptomatic and control groups at 45, 90 and 135 degrees of shoulder elevation, while no differences between symptomatic and asymptomatic group were found. There were not statistically significant differences between groups for both PMI and LSI (see Table 3).



|                         | Symptomatic vs<br>Asymptomatic<br>shoulder<br>differences<br>(95%CI) | p    | Symptomatic vs<br>Control shoulder<br>differences<br>(95%CI) | p       |
|-------------------------|----------------------------------------------------------------------|------|--------------------------------------------------------------|---------|
| SUR                     |                                                                      |      |                                                              |         |
| At 45°GH<br>abduction   | -1,15<br>(-2,46 to -0,15)                                            | 0.09 | 2,01<br>(0,59 to 3,42)                                       | 0.003*  |
| At 90° GH<br>abduction  | -0,67<br>(-3,35 to 2)                                                | 0.82 | 3,98<br>(1,08 to 6,88)                                       | 0.004*  |
| At 135° GH<br>abduction | 1,02<br>(-2,41 to 4,45)                                              | 0.76 | 8,96<br>(5,24 to 12,6)                                       | <0.001* |
| PMI                     | -0,34<br>(-1,04 to 0,36)                                             | 0.49 | 0,45<br>(-0,32 to 1,21)                                      | 0.351   |
| LSI                     | 0,00<br>(-0,55 to 0,55)                                              | 1    | 0.05<br>(-0,55 to 0,64)                                      | 0.98    |

Table 3: Between-group differences (Tukey post-hoc analysis)

CI: confidence interval; SUR: scapular upward rotation; GH: glenohumeral; PMI: pectoralis minor index; LSI: levator scapulae index

\*: statistically significant ( $p < 0.05$ )

## DISCUSSION

This study aimed to explore potential differences in scapular positioning and scapular pattern of movement between the symptomatic shoulder in patients with chronic SAPS,

1  
2  
3 compared to the contralateral asymptomatic, and control shoulders. We found statistical  
4 significant differences in the three groups in SUR at 45, 90 and 135 degrees of shoulder  
5 elevation. Specifically, an increased SUR at all positions (45, 90 and 135 degrees) was  
6 found in favour of the symptomatic shoulders when symptomatic and control  
7 participants were compared. No differences were found between symptomatic and  
8 asymptomatic groups. Hence, our hypothesis was only partially confirmed. Regarding  
9 PMI and LSI, there were no significant differences in the groups, thus, our hypothesis  
10 was not confirmed.  
11  
12

13 This is the first study that compares SUR, PMI and LSI between both symptomatic and  
14 asymptomatic shoulders in patients with SAPS, and between symptomatic shoulder with  
15 control subjects, using accessible and low-cost tools. Previous studies have reported  
16 differences in SUR during arm elevation between the symptomatic and the  
17 asymptomatic shoulder[19,20,34], showing a decreased SUR in the symptomatic  
18 shoulders, mainly within the first degrees of elevation in the scapular plane. We found a  
19 significantly increased SUR in the symptomatic shoulder of patients when compared  
20 with control subjects. These differences surpassed the MDC95 in all the positions (45,  
21 90 and 135 degrees of shoulder elevation). This is not supported by current literature,  
22 which suggests the presence of a decreased SUR in shoulders with subacromial  
23 symptoms compared to healthy controls[19,34,35] This can be explained by the fact that  
24 patients that were included in our study experienced shoulder pain of a long duration,  
25 meaning chronicity of symptoms. In this context, the firing pattern of scapular muscle  
26 units can change, generating an early SUR in an attempt to avoid pain. This altered  
27 pattern has been found in a recent study[36] . It can be hypothesized that early stages of  
28 SAPS could present a deficit in SUR while more advanced stages can develop a  
29 compensatory increased SUR. As this was not measured in this study, further  
30  
31  
32  
33  
34  
35  
36  
37  
38  
39  
40  
41  
42  
43  
44  
45  
46  
47  
48  
49  
50  
51  
52  
53  
54  
55  
56  
57  
58  
59  
60

1  
2  
3 investigation is needed to confirm that. In other shoulder conditions, current research  
4 analysing SUR in both symptomatic and pain-free shoulders does not sustain strong  
5 conclusions. Kijima et al.[37] showed an absence of differences in SUR, measured by a  
6 3-dimensional scapular kinematic analysis, in symptomatic rotator cuff tears,  
7 contralateral shoulder and healthy shoulders. Furthermore, Hung et al.[38]reported no  
8 differences in SUR, measured by 3-dimensional analysis, in patients with glenohumeral  
9 instability and healthy controls.  
10  
11  
12  
13  
14  
15  
16  
17  
18  
19  
20

21 With regard to the pectoralis minor length, there was an absence of statistical significant  
22 difference between the symptomatic and the asymptomatic shoulders, as well as in  
23 symptomatic shoulder patients when compared with controls. This finding was contrary  
24 to what was expected, since a more anterior tilted positioning of the scapula is thought  
25 to be correlated with a potential risk of SAPS. Our results are in line with those obtained  
26 by Struyf et al.[14] The aforementioned study showed PMI values of 9.17 (SD 0.54) in  
27 the dominant side in the control group, 9.66 (SD 0.68) in the symptomatic side and 9.64  
28 (SD 0.72) in the asymptomatic side in the patient group, but they did not study the  
29 statistical differences between groups. On the other hand, Lewis et al. [15]also reported  
30 values that analysed pectoralis minor length. Nevertheless, comparisons with the  
31 present study are not possible as the used test was different (acromion-table distance  
32 test). To our knowledge there are no studies investigating these potential differences.  
33 Previous studies[12]have found a similar scapular behaviour to those suffering from  
34 SIS, in healthy subjects with a shortened pectoralis minor. Likewise, pectoralis minor  
35 length presents a weak positive correlation with the acromiohumeral distance in healthy  
36 male athletes[29], which means that the pectoralis minor could have a slight influence in  
37 the scapular positioning in the case of shortening. However, based on the results  
38  
39  
40  
41  
42  
43  
44  
45  
46  
47  
48  
49  
50  
51  
52  
53  
54  
55  
56  
57  
58  
59  
60

1  
2  
3 obtained in the present study, and also on previous inconsistent evidence on this topic  
4  
5 [6,10], a shortened pectoralis minor does not seem to play a key role in patients with  
6  
7 chronic SAPS, when compared to contralateral non-affected shoulders and control  
8  
9 subjects.  
10

11  
12  
13  
14 In relation to levator scapulae length, there was an absence of differences between  
15  
16 symptomatic and asymptomatic shoulder in patients, and between symptomatic  
17  
18 shoulder and controls in this study. As far as we know, this is the first study that  
19  
20 analyses such differences between subjects with shoulder symptoms and controls, so  
21  
22 comparisons with others are difficult. It is thought that a shortened levator scapulae can  
23  
24 produce a scapula more downwardly rotated[13] and, hence, a greater compromise of  
25  
26 the subacromial space during overhead movements. As we did not determine the  
27  
28 scapular position in this study, a conclusion on the absence of differences in levator  
29  
30 scapulae length in different groups cannot be made, thus further studies are needed in  
31  
32 this field.  
33  
34  
35  
36  
37  
38  
39

40 Some strong points from this study need to be mentioned. First, an exhaustive  
41  
42 ultrasound and clinical assessment to avoid the inclusion of patients with rotator cuff  
43  
44 tears, was carried out. Second, the examiner who assessed all the measurements had  
45  
46 extensive clinical experience.  
47

48  
49 On the other hand, some limitations need to be recognized. As only one examiner  
50  
51 assessed all the outcome measures, inter-rater reliability was not calculated, so this  
52  
53 could introduce bias. Moreover, as the minimal clinically important difference of SUR  
54  
55 is unknown, we cannot make a conclusion as to whether the differences found in this  
56  
57 study have clinical importance or not. Our results should be taken with caution when  
58  
59  
60

1  
2  
3 interpreted, as a sample with chronic SAPS was studied, so we do not know if these  
4 results can be extrapolated to other populations, e.g. acute shoulder pain. Lastly,  
5 including healthy controls by using a SPADI score below 15 points could mean bias.  
6  
7  
8  
9

10  
11  
12 The present results could have clinical implications, and could contribute to increase the  
13 body of knowledge in the field of scapular biomechanic tests. First, it seems that  
14 pectoralis minor and/or levator scapulae are not distinguishing factors when comparing  
15 the symptomatic and the contralateral asymptomatic shoulder in subjects suffering from  
16 SAPS. Second, the use of the SUR test at 45°, 90° and 135° of shoulder elevation may  
17 be useful in the assessment of shoulder conditions when compared to values from  
18 control subjects.  
19  
20  
21  
22  
23  
24  
25  
26  
27  
28  
29

30  
31 Further research that analyses levator scapulae length and scapular positioning, and the  
32 minimal clinical important difference in SUR, would contribute to enhance knowledge  
33 in this field. Moreover, studies analysing changes in SUR and pectoralis minor length  
34 after application of physical therapies are necessary to corroborate their contribution, as  
35 indicators of improvement, when patients with chronic SAPS are treated.  
36  
37  
38  
39  
40  
41  
42  
43

44  
45 In conclusion, SUR is greater in patients with chronic SAPS when compared with  
46 controls at different angles of shoulder elevation, and is also greater in PMI values at  
47 rest position. The usefulness of the present findings is theorized, but further studies to  
48 confirm this in clinical practice are needed.  
49  
50  
51  
52  
53  
54  
55  
56  
57  
58  
59  
60

### Contributor ship statement

The presented work follows the ICMJE recommends for authorship, based on the following 4 criteria:

All authors have made substantial contributions to the conception or design of the work (SNL and ALS); or the acquisition (SNL, MFS and ALS), analysis (JMMA and ALS), or interpretation of data for the work (SNL, and ALS); AND

Drafting the work or revising it critically for important intellectual content (SNL, MFS, FS, JMC, JMMA and ALS); AND

Final approval of the version to be published (SNL, MFS, FS, JMC, JMMA and ALS); AND

Agreement to be accountable for all aspects of the work in ensuring that questions related to the accuracy or integrity of any part of the work are appropriately investigated and resolved.

In addition, authors have confidence in the integrity of the contributions of their co-authors.

### Competing interests

All authors state that the funders had no role in the study and they have no conflicts of interest to declare. All authors have made a substantial scientific contribution to the study and they are thoroughly familiar with the primary data. All authors have read the complete manuscript and take responsibility for the content and completeness of it and understand that if the paper, or any part of it, is found to be faulty or fraudulent, all authors share responsibility.

### Funding

This research did not receive any specific grant from funding agencies in the public, commercial, or not-for-profit sectors.

### Data sharing statement

1  
2  
3 The data sharing statement is currently not available due to a secondary analysis is  
4 being made. However, the available data can be obtained by contacting the  
5  
6 corresponding author when the whole work is finished.  
7  
8  
9  
10  
11  
12  
13

## 14 REFERENCES

- 15  
16 1 Herin F, Vézina M, Thaon I, *et al.* Predictors of chronic shoulder pain after 5  
17 years in a working population. *Pain* 2012;**153**:2253–9.  
18  
19 doi:10.1016/j.pain.2012.07.024  
20  
21  
22  
23 2 Luime J, Koes B, Hendriksen I, *et al.* Prevalence and incidence of shoulder pain  
24 in the general population; a systematic review. *Scand J Rheumatol* 2004;**33**:73–  
25  
26 81. doi:16167509  
27  
28  
29  
30 3 Bergman GJ, Winters JC, Groenier KH, *et al.* Manipulative Therapy in Addition  
31 to Usual Care for Patients With Shoulder Complaints: Results of Physical  
32 Examination Outcomes in a Randomized Controlled Trial. *J Manipulative*  
33  
34 *Physiol Ther* 2010;**33**:96–101. doi:10.1016/j.jmpt.2009.12.004  
35  
36  
37  
38  
39 4 Roquelaure Y, Ha C, Leclerc A, *et al.* Epidemiologic surveillance of upper-  
40 extremity musculoskeletal disorders in the working population. *Arthritis Care*  
41  
42 *Res* 2006;**55**:765–78. doi:10.1002/art.22222  
43  
44  
45  
46 5 Linsell L, Dawson J, Zondervan K, *et al.* Prevalence and incidence of adults  
47 consulting for shoulder conditions in UK primary care; patterns of diagnosis and  
48  
49 referral. *Rheumatology* 2006;**45**:215–21. doi:10.1093/rheumatology/kei139  
50  
51  
52  
53 6 Ratcliffe E, Pickering S, Mclean S, *et al.* Is there a relationship between  
54 subacromial impingement syndrome and scapular orientation? A systematic  
55  
56 review. *Br J Sport Med* 2014;**48**:1251–6. doi:10.1136/bjsports-2013-092389  
57  
58  
59  
60 7 McCreesh KM, Crotty JM, Lewis JS. Acromiohumeral distance measurement in

- 1  
2  
3 rotator cuff tendinopathy: is there a reliable, clinically applicable method? A  
4 systematic review. *Br J Sports Med* 2013;:298–305. doi:10.1136/bjsports-2012-  
5  
6 092063  
7  
8  
9  
10 8 Diercks R, Bron C, Dorrestijn O, *et al.* Guideline for diagnosis and treatment of  
11 subacromial pain syndrome. *Acta Orthop* 2014;**85**:314–22.  
12  
13 doi:10.3109/17453674.2014.920991  
14  
15  
16  
17 9 van der Windt DA, Koes BW, Boeke AJ, *et al.* Shoulder disorders in general  
18 practice: prognostic indicators of outcome. *Br J Gen Pract* 1996;**46**:519–23.  
19  
20  
21 10 Timmons MK, Thigpen CA, Seitz AL, *et al.* Scapular Kinematics and  
22 Subacromial-Impingement Syndrome : A Meta-Analysis. 2012;:354–70.  
23  
24  
25  
26 11 Kibler WB, Ludewig PM, McClure PW, *et al.* Clinical implications of scapular  
27 dyskinesia in shoulder injury: the 2013 consensus statement from the ‘scapular  
28 summit’. *Br J Sports Med* 2013;**47**:877–85. doi:10.1136/bjsports-2013-092425  
29  
30  
31  
32  
33 12 Borstad JD, Ludewig PM. The effect of long versus short pectoralis minor resting  
34 length on scapular kinematics in healthy individuals. *J Orthop Sports Phys Ther*  
35 2005;**35**:227–38. doi:10.2519/jospt.2005.35.4.227  
36  
37  
38  
39  
40 13 Lee JH, Cynn HS, Choi WJ, *et al.* Reliability of levator scapulae index in  
41 subjects with and without scapular downward rotation syndrome. *Phys Ther*  
42 *Sport* 2016;**19**:1–6. doi:10.1016/j.ptsp.2015.07.002  
43  
44  
45  
46  
47 14 Struyf F, Meeus M, Fransen E, *et al.* Interrater and intrarater reliability of the  
48 pectoralis minor muscle length measurement in subjects with and without  
49 shoulder impingement symptoms. *Man Ther* 2014;:1–5.  
50  
51  
52  
53  
54  
55  
56 15 Lewis JS, Valentine RE. The pectoralis minor length test : a study of the intra-  
57 rater reliability symptoms. *BMC Musculoskelet Disord* 2007;**10**:1–10.  
58  
59  
60



- 1  
2  
3 doi:10.1186/1471-2474-8-64  
4  
5  
6 16 Rosa DP, Borstad JD, Pires ED, *et al.* Reliability of measuring pectoralis minor  
7 muscle resting length in subjects with and without signs of shoulder  
8 impingement. *Brazilian J Phys Ther* 2016;**20**:176–83. doi:10.1590/bjpt-  
9 rbf.2014.0146  
10  
11  
12  
13  
14 17 Rosa DP, Santos R V., Gava V, *et al.* Shoulder external rotation range of motion  
15 and pectoralis minor length in individuals with and without shoulder pain.  
16  
17  
18 *Physiother Theory Pract* 2018;**16**:1–9. doi:10.1080/09593985.2018.1459985  
19  
20  
21 18 Rosa DP, Borstad JD, Pogetti LS, *et al.* Effects of a stretching protocol for the  
22 pectoralis minor on muscle length , function , and scapular kinematics in  
23 individuals with and without shoulder pain. *J Hand Ther* 2016;:1–9.  
24  
25  
26  
27  
28 19 Struyf F, Nijs J, Baeyens JP, *et al.* Scapular positioning and movement in  
29 unimpaired shoulders, shoulder impingement syndrome, and glenohumeral  
30 instability. *Scand J Med Sci Sport* 2011;**21**:352–8. doi:10.1111/j.1600-  
31 0838.2010.01274.x  
32  
33  
34  
35  
36  
37 20 Ellenbecker TS, Cools A. Rehabilitation of shoulder impingement syndrome and  
38 rotator cuff injuries: an evidence-based review. *Br J Sports Med* 2010;**44**:319–27.  
39  
40  
41  
42  
43  
44  
45 21 Struyf F, Nijs J, Mottram S, *et al.* Clinical assessment of the scapula: a review of  
46 the literature. *Br J Sports Med* 2014;**48**:883–90. doi:10.1136/bjsports-2012-  
47 091059  
48  
49  
50  
51 22 Larsen CM, Juul-kristensen B, Lund H, *et al.* Measurement properties of existing  
52 clinical assessment methods evaluating scapular positioning and function . A  
53  
54  
55  
56  
57  
58 23 Groef A De, Kampen M Van, Vervloesem N, *et al.* Ac ce pt us t. *Physiotherapy*  
59  
60

- 1  
2  
3 Published Online First: 2016. doi:10.1016/j.physio.2016.07.002  
4  
5  
6 24 Kibler W Ben, Sciascia A. Current concepts : scapular dyskinesis Current  
7 concepts : scapular dyskinesis. *Sport Med* 2010;:300–5.  
8  
9 doi:10.1136/bjism.2009.058834  
10  
11  
12 25 Cools a M, Cambier D, Witvrouw EE. Screening the athlete’s shoulder for  
13 impingement symptoms: a clinical reasoning algorithm for early detection of  
14 shoulder pathology. *Br J Sports Med* 2008;**42**:628–35.  
15  
16  
17 26 Wiener SN, Seitz WH. Sonography of the shoulder in patients with tears of the  
18 rotator cuff: Accuracy and value for selecting surgical options. *Am J Roentgenol*  
19 1993;**160**:103–7. doi:10.1177/875647939300900224  
20  
21  
22  
23  
24  
25  
26 27 Engebretsen K, Grotle M, Bautz-Holter E, Ekeberg OM BJ. Predictors of  
27 shoulder pain and disability index (SPADI) and work status after 1 year in  
28 patients with subacromial shoulder pain. *BMC Musculoskelet Disord*  
29 2010;**11**:218.  
30  
31  
32  
33  
34  
35 28 Watson L, Balster S, Finch C, *et al.* Measurement of scapula upward rotation: a  
36 reliable clinical procedure. *Br J Sports Med* 2005;**39**:599–603.  
37  
38  
39  
40  
41  
42  
43 29 Tanya Mackenzie, Lee Herrington, Lenard Funk AC. Relationship between  
44 extrinsic factors and acromio-humeral distance. *Man Ther* Published Online  
45 First: 2016. doi:10.1016/j.math.2016.02.005  
46  
47  
48  
49 30 Roach KE, Budiman-Mak E, Songsiridej N, *et al.* Development of a shoulder  
50 pain and disability index. *Arthritis Care Res* 1991;**4**:143–9.  
51  
52  
53  
54  
55  
56 31 MacDermid JC, Solomon P, Prkachin K. The Shoulder Pain and Disability Index  
57 demonstrates factor, construct and longitudinal validity. *BMC Musculoskelet*  
58  
59  
60

- 1  
2  
3 *Disord* 2006;**7**:12. doi:10.1186/1471-2474-7-12  
4  
5  
6 32 Membrilla-Mesa MD, Cuesta-Vargas AI, Pozuelo-Calvo R, *et al.* Shoulder pain  
7 and disability index: Cross cultural validation and evaluation of psychometric  
8 properties of the Spanish version. *Health Qual Life Outcomes* 2015;**13**:1–6.  
9  
10 doi:10.1186/s12955-015-0397-z  
11  
12  
13  
14 33 Portney LG, Watkins MP. Statistical measures of reliability. In: *Foundations of*  
15  
16 *clinical research : applications to practice.* 2000. 557–86.  
17  
18  
19 34 Turgut E, Duzgun I, Baltaci G. Scapular asymmetry in participants with and  
20 without shoulder impingement syndrome; a three-dimensional motion analysis.  
21  
22 *Clin Biomech* 2016;**39**:1–8. doi:10.1016/j.clinbiomech.2016.09.001  
23  
24  
25  
26 35 Ludewig PM, Cook TM. Alterations in Shoulder Kinematics and Associated  
27 Muscle Activity in People With Symptoms of Shoulder Impingement Research  
28 Report Alterations in Shoulder Kinematics and Associated Muscle Activity in  
29 People With. *Phys Ther* 2000;**80**:276–91.  
30  
31  
32  
33  
34  
35 36 Michener LA, Sharma S, Cools AM, *et al.* Relative scapular muscle activity  
36 ratios are altered in subacromial pain syndrome. *J Shoulder Elb Surg* Published  
37 Online First: 2016. doi:10.1016/j.jse.2016.04.010  
38  
39  
40  
41  
42 37 Kijima T, Matsuki K, Ochiai N, *et al.* In vivo 3-dimensional analysis of scapular  
43 and glenohumeral kinematics : comparison of symptomatic or asymptomatic  
44 shoulders with rotator cuff tears and healthy shoulders. *J Shoulder Elb Surg*  
45 2015;**24**:1817–26. doi:10.1016/j.jse.2015.06.003  
46  
47  
48  
49  
50  
51 38 Hung Y, Darling WG. Scapular Orientation During Planar and Three-  
52 dimensional Upper Limb Movements in Individuals with Anterior Glenohumeral  
53 Joint Instability. Published Online First: 2013. doi:10.1002/pri.1558  
54  
55  
56  
57  
58  
59  
60

1  
2  
3  
4  
5  
6  
7  
8 LEGENDS  
9

10 Figure 1: Scapular upward rotation measurement.  
11

12 Figure 2: Pectoralis minor length measurement.  
13

14 Figure 3: Levator scapulae length measurement.  
15  
16  
17  
18  
19  
20  
21  
22  
23  
24  
25  
26  
27  
28  
29  
30  
31  
32  
33  
34  
35  
36  
37  
38  
39  
40  
41  
42  
43  
44  
45  
46  
47  
48  
49  
50  
51  
52  
53  
54  
55  
56  
57  
58  
59  
60

For peer review only

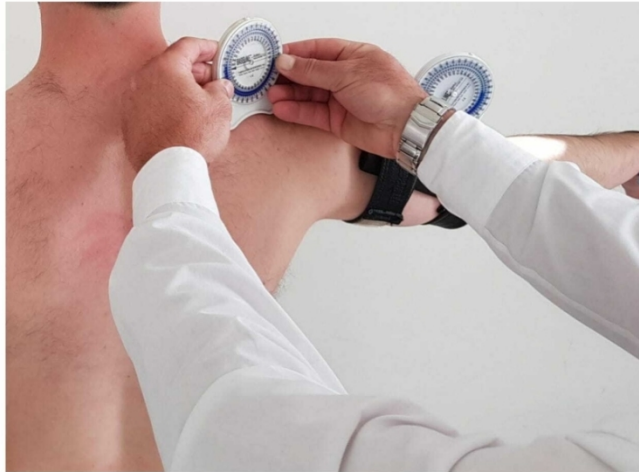

Scapular upward rotation measurement.

90x127mm (300 x 300 DPI)

1  
2  
3  
4  
5  
6  
7  
8  
9  
10  
11  
12  
13  
14  
15  
16  
17  
18  
19  
20  
21  
22  
23  
24  
25  
26  
27  
28  
29  
30  
31  
32  
33  
34  
35  
36  
37  
38  
39  
40  
41  
42  
43  
44  
45  
46  
47  
48  
49  
50  
51  
52  
53  
54  
55  
56  
57  
58  
59  
60

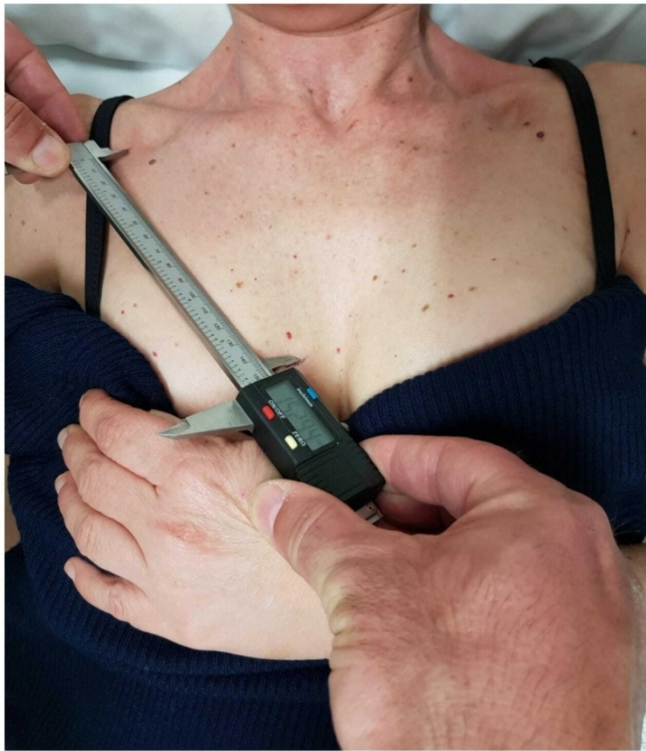

Pectoralis minor length measurement.

90x127mm (300 x 300 DPI)

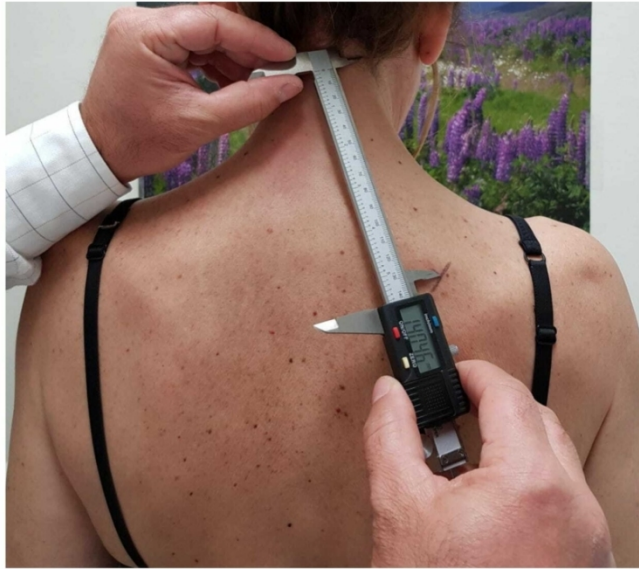

Levator scapulae length measurement

90x127mm (300 x 300 DPI)

## STROBE Statement—checklist of items that should be included in reports of observational studies

|                              | Item No | Recommendation                                                                                                                                                                                                                                                                                                                                                                                                                                                                                                                                                                                                                                                                                                 |
|------------------------------|---------|----------------------------------------------------------------------------------------------------------------------------------------------------------------------------------------------------------------------------------------------------------------------------------------------------------------------------------------------------------------------------------------------------------------------------------------------------------------------------------------------------------------------------------------------------------------------------------------------------------------------------------------------------------------------------------------------------------------|
| <b>Title and abstract</b>    | 1       | (a) Indicate the study's design with a commonly used term in the title or the abstract<br>(b) Provide in the abstract an informative and balanced summary of what was done and what was found <b>PAGE 1</b>                                                                                                                                                                                                                                                                                                                                                                                                                                                                                                    |
| <b>Introduction</b>          |         |                                                                                                                                                                                                                                                                                                                                                                                                                                                                                                                                                                                                                                                                                                                |
| Background/rationale         | 2       | Explain the scientific background and rationale for the investigation being reported <b>PAGE 3</b>                                                                                                                                                                                                                                                                                                                                                                                                                                                                                                                                                                                                             |
| Objectives                   | 3       | State specific objectives, including any prespecified hypotheses <b>PAGE 4</b>                                                                                                                                                                                                                                                                                                                                                                                                                                                                                                                                                                                                                                 |
| <b>Methods</b>               |         |                                                                                                                                                                                                                                                                                                                                                                                                                                                                                                                                                                                                                                                                                                                |
| Study design                 | 4       | Present key elements of study design early in the paper <b>PAGE 4</b>                                                                                                                                                                                                                                                                                                                                                                                                                                                                                                                                                                                                                                          |
| Setting                      | 5       | Describe the setting, locations, and relevant dates, including periods of recruitment, exposure, follow-up, and data collection <b>PAGE 4</b>                                                                                                                                                                                                                                                                                                                                                                                                                                                                                                                                                                  |
| Participants                 | 6       | (a) <i>Cohort study</i> —Give the eligibility criteria, and the sources and methods of selection of participants. Describe methods of follow-up<br><i>Case-control study</i> —Give the eligibility criteria, and the sources and methods of case ascertainment and control selection. Give the rationale for the choice of cases and controls<br><i>Cross-sectional study</i> —Give the eligibility criteria, and the sources and methods of selection of participants<br>(b) <i>Cohort study</i> —For matched studies, give matching criteria and number of exposed and unexposed<br><i>Case-control study</i> —For matched studies, give matching criteria and the number of controls per case <b>PAGE 5</b> |
| Variables                    | 7       | Clearly define all outcomes, exposures, predictors, potential confounders, and effect modifiers. Give diagnostic criteria, if applicable <b>PAGE 6-7-8</b>                                                                                                                                                                                                                                                                                                                                                                                                                                                                                                                                                     |
| Data sources/<br>measurement | 8*      | For each variable of interest, give sources of data and details of methods of assessment (measurement). Describe comparability of assessment methods if there is more than one group <b>PAGE 6-7-8</b>                                                                                                                                                                                                                                                                                                                                                                                                                                                                                                         |
| Bias                         | 9       | Describe any efforts to address potential sources of bias <b>PAGE 8</b>                                                                                                                                                                                                                                                                                                                                                                                                                                                                                                                                                                                                                                        |
| Study size                   | 10      | Explain how the study size was arrived at <b>PAGE 9</b>                                                                                                                                                                                                                                                                                                                                                                                                                                                                                                                                                                                                                                                        |
| Quantitative variables       | 11      | Explain how quantitative variables were handled in the analyses. If applicable, describe which groupings were chosen and why <b>PAGE 9</b>                                                                                                                                                                                                                                                                                                                                                                                                                                                                                                                                                                     |
| Statistical methods          | 12      | (a) Describe all statistical methods, including those used to control for confounding<br>(b) Describe any methods used to examine subgroups and interactions <b>PAGE 9</b><br>(c) Explain how missing data were addressed<br>(d) <i>Cohort study</i> —If applicable, explain how loss to follow-up was addressed<br><i>Case-control study</i> —If applicable, explain how matching of cases and controls was addressed<br><i>Cross-sectional study</i> —If applicable, describe analytical methods taking account of sampling strategy<br>(e) Describe any sensitivity analyses                                                                                                                                |

Continued on next page



**Results**

|                  |     |                                                                                                                                                                                                                                                                                                                                                                                                                                 |
|------------------|-----|---------------------------------------------------------------------------------------------------------------------------------------------------------------------------------------------------------------------------------------------------------------------------------------------------------------------------------------------------------------------------------------------------------------------------------|
| Participants     | 13* | (a) Report numbers of individuals at each stage of study—eg numbers potentially eligible, examined for eligibility, confirmed eligible, included in the study, completing follow-up, and analysed <b>PAGE 9-12</b><br>(b) Give reasons for non-participation at each stage<br>(c) Consider use of a flow diagram                                                                                                                |
| Descriptive data | 14* | (a) Give characteristics of study participants (eg demographic, clinical, social) and information on exposures and potential confounders <b>PAGE 10</b><br>(b) Indicate number of participants with missing data for each variable of interest<br>(c) <i>Cohort study</i> —Summarise follow-up time (eg, average and total amount)                                                                                              |
| Outcome data     | 15* | <i>Cohort study</i> —Report numbers of outcome events or summary measures over time<br><i>Case-control study</i> —Report numbers in each exposure category, or summary measures of exposure <b>PAGE 9-12</b><br><i>Cross-sectional study</i> —Report numbers of outcome events or summary measures                                                                                                                              |
| Main results     | 16  | (a) Give unadjusted estimates and, if applicable, confounder-adjusted estimates and their precision (eg, 95% confidence interval). Make clear which confounders were adjusted for and why they were included <b>PAGE 11-12</b><br>(b) Report category boundaries when continuous variables were categorized<br>(c) If relevant, consider translating estimates of relative risk into absolute risk for a meaningful time period |
| Other analyses   | 17  | Report other analyses done—eg analyses of subgroups and interactions, and sensitivity analyses                                                                                                                                                                                                                                                                                                                                  |

**Discussion**

|                  |    |                                                                                                                                                                                              |
|------------------|----|----------------------------------------------------------------------------------------------------------------------------------------------------------------------------------------------|
| Key results      | 18 | Summarise key results with reference to study objectives <b>PAGE 12</b>                                                                                                                      |
| Limitations      | 19 | Discuss limitations of the study, taking into account sources of potential bias or imprecision. Discuss both direction and magnitude of any potential bias <b>PAGE 15</b>                    |
| Interpretation   | 20 | Give a cautious overall interpretation of results considering objectives, limitations, multiplicity of analyses, results from similar studies, and other relevant evidence <b>PAGE 12-14</b> |
| Generalisability | 21 | Discuss the generalisability (external validity) of the study results <b>PAGE 15-16</b>                                                                                                      |

**Other information**

|         |    |                                                                                                                                                                                     |
|---------|----|-------------------------------------------------------------------------------------------------------------------------------------------------------------------------------------|
| Funding | 22 | Give the source of funding and the role of the funders for the present study and, if applicable, for the original study on which the present article is based <b>NON APPLICABLE</b> |
|---------|----|-------------------------------------------------------------------------------------------------------------------------------------------------------------------------------------|

\*Give information separately for cases and controls in case-control studies and, if applicable, for exposed and unexposed groups in cohort and cross-sectional studies.

**Note:** An Explanation and Elaboration article discusses each checklist item and gives methodological background and published examples of transparent reporting. The STROBE checklist is best used in conjunction with this article (freely available on the Web sites of PLoS Medicine at <http://www.plosmedicine.org/>, Annals of Internal Medicine at <http://www.annals.org/>, and Epidemiology at <http://www.epidem.com/>). Information on the STROBE Initiative is available at [www.strobe-statement.org](http://www.strobe-statement.org).
